# Supplementary material for: Facile synthesis of selenocarbamyl fluorides, selenoureas and their derivatives with [Me4N][SeCF3]
Source: Royal Society of Chemistry journal article supplement (doi:10.1039/d1qo00736j), 2021-01-01

## Supporting Information

### Facile Synthesis of Selenocarbamyl Fluorides, Selenoureas and Their Derivatives with [Me<sub>4</sub>N][SeCF<sub>3</sub>]

Lei Liu<sup>a</sup>, Long-Yu Ran<sup>a</sup>, Yucheng Gu<sup>b</sup>, and Cheng-Pan Zhang<sup>a,c,\*</sup>

<sup>a</sup> School of Materials Science and Engineering & School of Chemistry, Chemical Engineering and Life Science, Wuhan University of Technology, 122 Luoshi Road, Wuhan, 430070, China.

E-mail: cpzhang@whut.edu.cn; zhangchengpan1982@hotmail.com.

<sup>b</sup> Syngenta, Jealott's Hill International Research Centre, Bracknell, Berkshire RG426EY, UK.

<sup>c</sup> Key Laboratory of Organofluorine Chemistry, Shanghai Institute of Organic Chemistry, Chinese Academy of Sciences, 345 Lingling Road, Shanghai 200032, China.

#### Table of contents

|                                                                                                                                                 |     |
|-------------------------------------------------------------------------------------------------------------------------------------------------|-----|
| 1. General information.....                                                                                                                     | S2  |
| 2. Screening of the optimal conditions for the reactions of dibenzylamine ( <b>1a</b> ) with [Me <sub>4</sub> N][SeCF <sub>3</sub> ].....       | S2  |
| 3. Screening of the optimal conditions for the reactions of phenethylamine ( <b>4a</b> ) with [Me <sub>4</sub> N][SeCF <sub>3</sub> ].....      | S4  |
| 4. General procedure for the synthesis of selenocarbamoyl fluorides ( <b>3</b> ).....                                                           | S5  |
| 5. General procedures for the synthesis of selenoureas ( <b>5</b> ) from amines and [Me <sub>4</sub> N][SeCF <sub>3</sub> ].....                | S16 |
| 6. General procedure for the synthesis of cycloselenoureas and their derivatives ( <b>7</b> ) from [Me <sub>4</sub> N][SeCF <sub>3</sub> ]..... | S20 |
| 7. NMR spectra of the products.....                                                                                                             | S26 |

## 1. General information.

All reactions were carried out under a nitrogen atmosphere. Unless otherwise specified, NMR spectra were recorded in CDCl<sub>3</sub> on a 500 MHz (for <sup>1</sup>H), 471 MHz (for <sup>19</sup>F), and 126 MHz (for <sup>13</sup>C) spectrometer. All chemical shifts were reported in ppm relative to TMS (0 ppm for <sup>1</sup>H NMR) or PhCF<sub>3</sub> (-63.5 ppm for <sup>19</sup>F NMR) as an internal or external standard. The HPLC experiments were carried out on a Wufeng LC-100 II instrument (column: Shodex, C18, 5 μm, 4.6 × 250 mm), and the yields of product were determined by using the corresponding pure compound as an external standard. The coupling constants were reported in Hertz (Hz). The following abbreviations were used to explain the multiplicities: s = singlet, d = doublet, t = triplet, q = quartet, m = multiplet, brs = broad singlet. Melting points were measured and uncorrected. MS experiments were performed on a TOF-Q ESI instrument. [Me<sub>4</sub>N][SeCF<sub>3</sub>] was synthesized according to the literature.<sup>1</sup> Dibenzylamine derivatives (**1b-f**) were prepared according to the literatures.<sup>2</sup> Solvents were purified according to the literature.<sup>3</sup> Other reagents used in the reactions were all purchased from the commercial sources and used without further purification.

## 2. Screening of the optimal conditions for the reactions of dibenzylamine (**1a**) with [Me<sub>4</sub>N][SeCF<sub>3</sub>].

**Table S1.** Additive-free reactions of **1a** with [Me<sub>4</sub>N][SeCF<sub>3</sub>] in different solvents.

Reaction scheme: **1a** (dibenzylamine) + **2a** ([Me<sub>4</sub>N][SeCF<sub>3</sub>])  $\xrightarrow[\text{r.t., 12 h}]{\text{solvent}}$  **3a** (N-(dibenzyl)seleconium fluoride)

| Entry <sup>a</sup> | Solvent            | Yield ( <b>3a</b> , %) <sup>b</sup> |
|--------------------|--------------------|-------------------------------------|
| 1                  | CH <sub>3</sub> CN | 96 (93)                             |
| 2                  | THF                | 80                                  |
| 3                  | DCM                | 90                                  |
| 4                  | 1,4-dioxane        | 68                                  |
| 5                  | NMP                | 66                                  |
| 6                  | DMF                | 60                                  |
| 7                  | DMAc               | 56                                  |
| 8                  | DCE                | 48                                  |

|    |                  |    |
|----|------------------|----|
| 9  | DME              | 42 |
| 10 | <i>m</i> -xylene | 42 |
| 11 | chlorobenzene    | 37 |
| 12 | toluene          | 32 |

<sup>a</sup> Reaction conditions: **1a** (0.20 mmol), **2a** (0.24 mmol), solvent (2 mL), N<sub>2</sub>, room temperature. <sup>b</sup> Yields were determined by HPLC using **3a** as an external standard (*t<sub>R</sub>* = 9.53 min, λ<sub>max</sub> = 284 nm, water / methanol = 20 / 80 (v / v)). Isolated yield is depicted in the parenthesis.

**Table S2.** Reactions of **1a** and [Me<sub>4</sub>N][SeCF<sub>3</sub>] with different times.

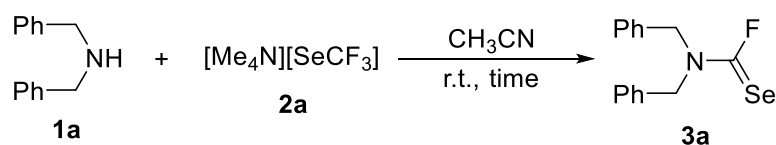

| Entry <sup>a</sup> | Time   | Yield ( <b>3a</b> , %) <sup>b</sup> |
|--------------------|--------|-------------------------------------|
| 1                  | 2 min  | 82                                  |
| 2                  | 5 min  | 87                                  |
| 3                  | 10 min | 93                                  |
| 4                  | 30 min | 96                                  |
| 5                  | 1 h    | 96                                  |
| 6                  | 2 h    | 98                                  |
| 7                  | 4 h    | 96                                  |
| 8                  | 12 h   | 96                                  |

<sup>a</sup> Reaction conditions: **1a** (0.20 mmol), **2a** (0.24 mmol), CH<sub>3</sub>CN (2 mL), N<sub>2</sub>, room temperature. <sup>b</sup> Yields were determined by HPLC using **3a** as an external standard (*t<sub>R</sub>* = 9.53 min, λ<sub>max</sub> = 284 nm, water / methanol = 20 / 80 (v / v)).

**Table S3.** Reactions of **1a** and [Me<sub>4</sub>N][SeCF<sub>3</sub>] with different molar ratios.

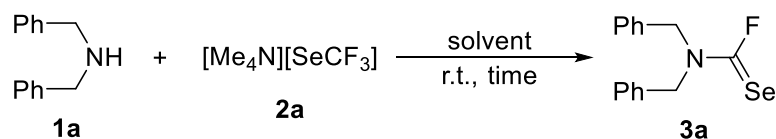

| Entry <sup>a</sup> | Time | <b>1a:2a</b> | Yield ( <b>3a</b> , %) <sup>b</sup> |
|--------------------|------|--------------|-------------------------------------|
|--------------------|------|--------------|-------------------------------------|

|    |        |       |                   |
|----|--------|-------|-------------------|
| 1  | 10 min | 1:1.2 | 93                |
| 2  | 1 h    | 1:1.2 | 96                |
| 3  | 12 h   | 1:1.2 | 96                |
| 4  | 10 min | 1:1   | 82                |
| 5  | 1 h    | 1:1   | 84                |
| 6  | 12 h   | 1:1   | 90                |
| 7  | 10 min | 1:1.1 | 82                |
| 8  | 1 h    | 1:1.1 | 82                |
| 9  | 12 h   | 1:1.1 | 92                |
| 10 | 12 h   | 1.5:1 | 99 <sup>c</sup>   |
| 11 | 12 h   | 2:1   | > 99 <sup>c</sup> |

<sup>a</sup> Reaction conditions: **1a** (0.20, 0.30, or 0.40 mmol), **2a** (0.20, 0.22, or 0.24 mmol), CH<sub>3</sub>CN (2 mL), N<sub>2</sub>, room temperature. <sup>b</sup> Yields were determined by HPLC using **3a** as an external standard ( $t_R = 9.53$  min,  $\lambda_{max} = 284$  nm, water / methanol = 20 / 80 (v / v)). <sup>c</sup> Isolated yield.

### 3. Screening of the optimal conditions for the reactions of phenethylamine (**4a**) with [Me<sub>4</sub>N][SeCF<sub>3</sub>].

**Table S4.** Additive-free reactions of **4a** with [Me<sub>4</sub>N][SeCF<sub>3</sub>] in different solvents.

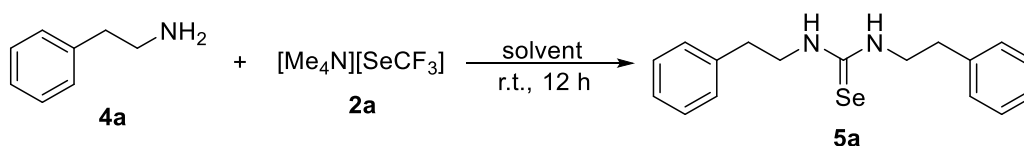

| Entry <sup>a</sup> | Solvent            | Yield ( <b>5a</b> , %) <sup>b</sup> |
|--------------------|--------------------|-------------------------------------|
| 1                  | CH <sub>3</sub> CN | 96                                  |
| 2                  | THF                | 89                                  |
| 3                  | DME                | 89                                  |
| 4                  | 1,4-dioxane        | 73                                  |
| 5                  | DCM                | 58                                  |
| 6                  | DMF                | 49                                  |
| 7                  | DMSO               | 40                                  |

<sup>a</sup> Reaction conditions: **4a** (0.40 mmol), **2a** (0.20 mmol), solvent (2 mL), N<sub>2</sub>, room

temperature. <sup>b</sup> Yields were determined by HPLC using **5a** as an external standard ( $t_R = 6.30$  min,  $\lambda_{max} = 218$  nm, water / methanol = 20 / 80 (v / v)).

**Table S5.** Reactions of **4a** and  $[\text{Me}_4\text{N}][\text{SeCF}_3]$  with different times.

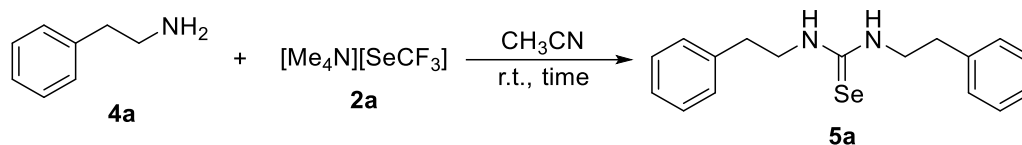

| Entry <sup>a</sup> | Time | Yield ( <b>5a</b> , %) <sup>b</sup> |
|--------------------|------|-------------------------------------|
| 1                  | 4 h  | 77                                  |
| 2                  | 6 h  | 81                                  |
| 3                  | 8 h  | 98 (93)                             |
| 4                  | 12 h | 96                                  |
| 5                  | 24 h | 98                                  |

<sup>a</sup> Reaction conditions: **4a** (0.40 mmol), **2a** (0.20 mmol),  $\text{CH}_3\text{CN}$  (2 mL),  $\text{N}_2$ , room temperature. <sup>b</sup> Yields were determined by HPLC using **5a** as an external standard ( $t_R = 6.30$  min,  $\lambda_{max} = 218$  nm, water / methanol = 20 / 80 (v / v)). Isolated yield is depicted in the parenthesis.

**Table S6.** Reactions of **4a** and  $[\text{Me}_4\text{N}][\text{SeCF}_3]$  with different molar ratios.

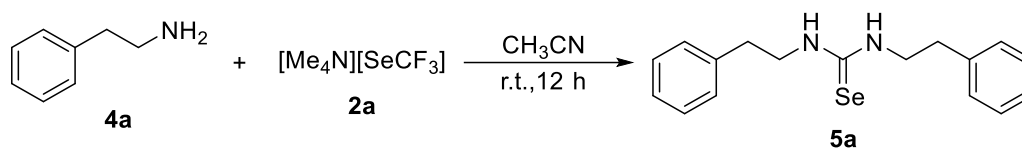

| Entry <sup>a</sup> | <b>1a:2a</b> | Yield ( <b>5a</b> , %) <sup>b</sup> |
|--------------------|--------------|-------------------------------------|
| 1                  | 1:1          | 66%, 70%                            |
| 2                  | 1:1.5        | 66%, 72%                            |
| 3                  | 1:2          | 66%, 71%                            |
| 4                  | 1.5:1        | 79%, 82%                            |
| 5                  | 2:1          | 93%                                 |

<sup>a</sup> Reaction conditions: **4a** (0.20, 0.30 or 0.40 mmol), **2a** (0.20, 0.30 or 0.40 mmol),  $\text{CH}_3\text{CN}$  (2 mL),  $\text{N}_2$ , room temperature. <sup>b</sup> Isolated yield.

#### 4. General procedure for the synthesis of selenocarbamoyl fluorides (**3**).

In a nitrogen-filled glovebox, a tube was charged with secondary aliphatic amines (**1**, 0.20 mmol), [Me<sub>4</sub>N][SeCF<sub>3</sub>] (**2a**, 53.2 mg, 0.24 mmol), and MeCN (2 mL) with stirring. The mixture was reacted at room temperature for 30 min and concentrated to dryness under reduced pressure. The residue was purified by column chromatography on silica gel using dichloromethane or a mixture of petroleum ether and ethyl acetate as eluents to give the title compound (**3**).

#### Dibenzylcarbamoseleoic fluoride (**3a**)

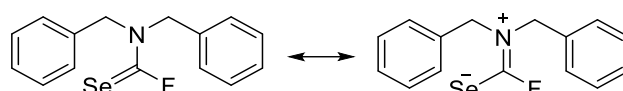

Light yellow oil (57.1 mg, 93%), a mixture of petroleum ether/ethyl acetate = 10/1 (v/v) as eluents for column chromatography. <sup>1</sup>H NMR (500 MHz, CDCl<sub>3</sub>) δ 7.41-7.35 (m, 7.85H), 7.18 (d, *J* = 6.7 Hz, 2.00H), 5.07 (s, 2H), 4.58 (s, 2H). <sup>19</sup>F NMR (471 MHz, CDCl<sub>3</sub>) δ 27.2 (m). <sup>13</sup>C NMR (126 MHz, CDCl<sub>3</sub>) δ 188.6 (d, *J* = 350 Hz), 133.4, 133.2, 129.2, 129.1, 128.7, 128.7, 128.3, 127.9, 57.5 (d, *J* = 7.0 Hz), 51.3 (d, *J* = 7.4 Hz). IR (KBr): 3063, 3030, 2926, 2852, 1605, 1586, 1517, 1496, 1453, 1358, 1262, 1232, 1202, 1170, 1082, 1072, 1029, 1001, 939, 887, 824, 752, 735, 700, 629 cm<sup>-1</sup>. HRMS-ESI (m/z) calcd. for [C<sub>15</sub>H<sub>15</sub>FNSe]<sup>+</sup> ([M + H]<sup>+</sup>): 308.0348; found: 308.0356.

#### Benzyl(4-fluorobenzyl)carbamoseleoic fluoride (**3b**)

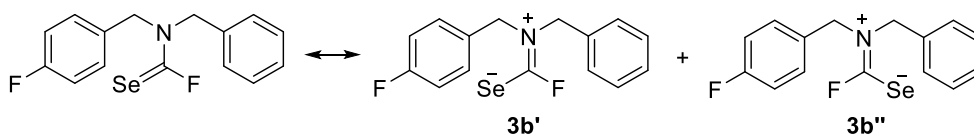

Light yellow oil (50.7 mg, 78%), a mixture of petroleum ether/ethyl acetate = 10/1 (v/v) as eluents for column chromatography. <sup>1</sup>H NMR (500 MHz, CDCl<sub>3</sub>, **3b'** + **3b''**) δ 7.39-7.37 (m, 4.94H), 7.18-7.13 (m, 2.00H), 7.09-7.05 (m, 2.01H), 5.06 (s) + 5.03 (s) (2H), 4.57 (s) + 4.55 (s) (2H). <sup>19</sup>F NMR (471 MHz, CDCl<sub>3</sub>, **3b'** + **3b''**) δ 27.4 (m), 27.3 (m), -112.6 (m), -112.7 (m). <sup>13</sup>C NMR (126 MHz, CDCl<sub>3</sub>, **3b'** + **3b''**) δ 187.1 (d, *J* = 350.8 Hz), 187.1 (d, *J* = 350.2 Hz), 162.9 (d, *J* = 248.1 Hz), 162.8 (d, *J* = 248.5 Hz), 133.2, 133.0, 130.3 (d, *J* = 8.3 Hz), 129.9 (d, *J* = 8.4 Hz), 129.3, 129.3 (d, *J* = 3.1 Hz), 129.1, 129.0 (d, *J* = 3.3 Hz), 128.8, 128.8, 128.3, 127.9, 116.2 (d, *J* = 21.5 Hz), 116.1 (d, *J* = 21.5 Hz), 57.6 (d, *J* = 7.0 Hz), 56.8 (d, *J* = 6.8 Hz), 51.3 (d, *J* = 7.4 Hz), 50.6 (d, *J* = 7.5 Hz). IR (KBr): 3064, 3032, 2928, 2854, 1606, 1510, 1446, 1416, 1357, 1261, 1225, 1203, 1170, 1158, 1100, 1081, 1015, 995, 932, 851, 823, 748, 701, 667

cm<sup>-1</sup>. HRMS-ESI (m/z) calcd. for [C<sub>15</sub>H<sub>14</sub>F<sub>2</sub>NSe]<sup>+</sup> ([M + H]<sup>+</sup>): 327.0288; found: 327.0285.

### Benzyl(4-chlorobenzyl)carbamoselenoic fluoride (**3c**)

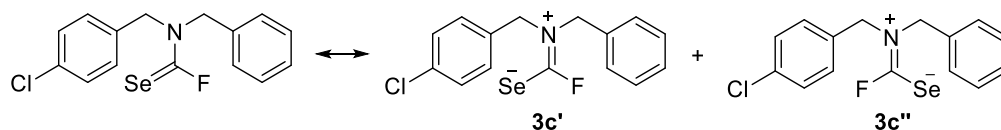

Light yellow oil (55.9 mg, 82%), a mixture of petroleum ether/ethyl acetate = 10/1 (v/v) as eluents for column chromatography. <sup>1</sup>H NMR (500 MHz, CDCl<sub>3</sub>, **3c'** + **3c''**) δ 7.40-7.31 (m, 6.88H), 7.17 (d, *J* = 7.2 Hz, 1.13H), 7.10 (d, *J* = 8.3 Hz, 0.94H), 5.05 (s) + 5.02 (s) (2H), 4.57 (s) + 4.54 (s) (2H). <sup>19</sup>F NMR (471 MHz, CDCl<sub>3</sub>, **3c'** + **3c''**) δ 27.7 (m), 27.3 (m). <sup>13</sup>C NMR (126 MHz, CDCl<sub>3</sub>, **3c'** + **3c''**) δ 187.3 (d, *J* = 350.8 Hz), 187.1 (d, *J* = 350.8 Hz), 134.7, 134.7, 133.2, 132.9, 131.9, 131.7, 129.7, 129.4, 129.3, 129.3, 129.2, 128.8, 128.8, 128.3, 127.9, 57.7 (d, *J* = 7.0 Hz), 56.8 (d, *J* = 6.8 Hz), 51.5 (d, *J* = 7.4 Hz), 50.6 (d, *J* = 7.5 Hz). IR (KBr): 3063, 3030, 2928, 2853, 1598, 1586, 1514, 1493, 1444, 1408, 1356, 1282, 1229, 1168, 1087, 1015, 995, 934, 891, 842, 800, 727, 700, 669 cm<sup>-1</sup>. HRMS-ESI (m/z) calcd. for [C<sub>15</sub>H<sub>14</sub>FCINSe]<sup>+</sup> ([M + H]<sup>+</sup>): 341.9959; found: 341.9952.

### Benzyl(4-bromobenzyl)carbamoselenoic fluoride (**3d**)

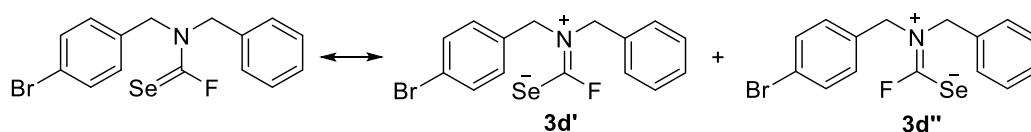

Light yellow oil (55.3 mg, 77%), a mixture of petroleum ether/ethyl acetate = 10/1 (v/v) as eluents for column chromatography. <sup>1</sup>H NMR (500 MHz, CDCl<sub>3</sub>, **3d'** + **3d''**) δ 7.51 (dd, *J* = 8.4, 2.7 Hz, 1.89H), 7.39-7.37 (m, 3.86H), 7.26 (d, *J* = 8.3 Hz, 1.19H), 7.17 (d, *J* = 6.5 Hz, 1.09H), 7.04 (d, *J* = 8.3 Hz, 0.94H), 5.05 (s) + 5.00 (s) (2H), 4.57 (s) + 4.52 (s) (2H). <sup>19</sup>F NMR (471 MHz, CDCl<sub>3</sub>, **3d'** + **3d''**) δ 27.7 (m), 27.3 (m). <sup>13</sup>C NMR (126 MHz, CDCl<sub>3</sub>, **3d'** + **3d''**) δ 187.3 (d, *J* = 350.6 Hz), 187.2 (d, *J* = 350.3 Hz), 133.2, 132.9, 132.4, 132.4, 132.2, 132.2, 130.0, 129.6, 129.3, 129.2, 128.8, 128.8, 128.3, 127.9, 122.8, 122.8, 57.7 (d, *J* = 7.0 Hz), 56.9 (d, *J* = 6.8 Hz), 51.5 (d, *J* = 7.4 Hz), 50.7 (d, *J* = 7.5 Hz). IR (KBr): 3062, 3030, 2928, 2853, 1604, 1514, 1441, 1405, 1355, 1280, 1229, 1169, 1107, 1072, 1012, 934, 891, 839, 795, 748, 724, 701, 669, 642 cm<sup>-1</sup>. HRMS-ESI (m/z) calcd. for [C<sub>15</sub>H<sub>14</sub>FBrNSe]<sup>+</sup> ([M + H]<sup>+</sup>): 385.9453; found:

385.9450.

Benzyl(4-methoxybenzyl)carbamoseleoic fluoride (**3e**)

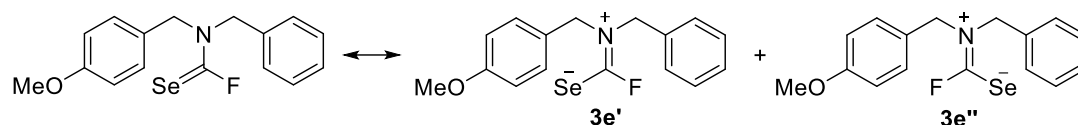

Light yellow oil (62.7 mg, 93%), a mixture of petroleum ether/ethyl acetate = 5/1 (v/v) as eluents for column chromatography.  $^1\text{H}$  NMR (500 MHz,  $\text{CDCl}_3$ , **3e'** + **3e''**)  $\delta$  7.41-7.35 (m, 3.94H), 7.34 (d,  $J = 8.6$  Hz, 1.01H), 7.18 (d,  $J = 6.8$  Hz, 1.00H), 7.11 (d,  $J = 8.5$  Hz, 1.00H), 6.91 (m, 2.00H), 5.04 (s) + 5.00 (s) (2H), 4.56 (s) + 4.51 (s) (2H), 3.82 (s) + 3.82 (s) (3H).  $^{19}\text{F}$  NMR (471 MHz,  $\text{CDCl}_3$ , **3e'** + **3e''**)  $\delta$  27.2 (m), 26.6 (m).  $^{13}\text{C}$  NMR (126 MHz,  $\text{CDCl}_3$ , **3e'** + **3e''**)  $\delta$  186.8 (d,  $J = 350.1$  Hz), 186.7 (d,  $J = 350.6$  Hz), 160.0, 159.9, 133.5, 133.2, 129.9, 129.6, 129.2, 129.1, 128.7, 128.6, 128.3, 127.9, 125.4, 125.0, 114.6, 114.4, 57.2 (d,  $J = 6.9$  Hz), 57.0 (d,  $J = 7.1$  Hz), 55.4, 55.4, 51.0 (d,  $J = 7.3$  Hz), 50.8 (d,  $J = 7.5$  Hz). IR (KBr): 3063, 3031, 3003, 2955, 2933, 2835, 1611, 1585, 1514, 1441, 1421, 1356, 1304, 1250, 1230, 1167, 1113, 1081, 1031, 993, 931, 889, 846, 816, 739, 700, 667  $\text{cm}^{-1}$ . HRMS-ESI (m/z) calcd. for  $[\text{C}_{16}\text{H}_{17}\text{FNOSe}]^+$  ( $[\text{M} + \text{H}]^+$ ): 338.0454; found: 338.0463.

Benzyl(4-cyanobenzyl)carbamoseleoic fluoride (**3f**)

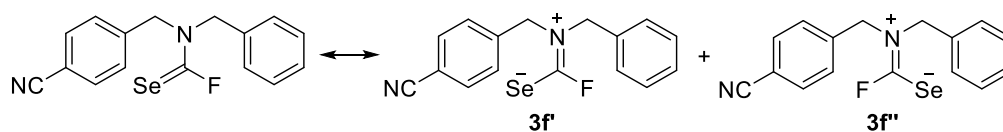

White solid (61.8 mg, 93%), a mixture of petroleum ether/ethyl acetate = 5/1 (v/v) as eluents for column chromatography. M.p.: 69.9-71.5  $^{\circ}\text{C}$ .  $^1\text{H}$  NMR (500 MHz,  $\text{CDCl}_3$ , **3f'** + **3f''**)  $\delta$  7.66 (dd,  $J = 8.2, 1.7$  Hz, 1.95H), 7.46 (d,  $J = 8.2$  Hz, 1.15H), 7.40-7.34 (m, 3.82H), 7.25 (d,  $J = 8.2$  Hz, 0.95H), 7.17 (m, 1.16H), 5.10 (s) + 5.08 (s) (2H), 4.63 (s) + 4.61 (s) (2H).  $^{19}\text{F}$  NMR (471 MHz,  $\text{CDCl}_3$ , **3f'** + **3f''**)  $\delta$  28.8 (m), 27.5 (m).  $^{13}\text{C}$  NMR (126 MHz,  $\text{CDCl}_3$ , **3f'** + **3f''**)  $\delta$  187.7 (d,  $J = 351.5$  Hz), 187.4 (d,  $J = 351.1$  Hz), 138.7, 138.6, 132.9, 132.8, 132.6, 129.4, 129.2, 129.0, 129.0, 128.7, 128.4, 128.3, 128.0, 118.3, 118.1, 112.6, 112.5, 58.4 (d,  $J = 7.0$  Hz), 57.1 (d,  $J = 6.4$  Hz), 52.3 (d,  $J = 7.2$  Hz), 51.0 (d,  $J = 7.3$  Hz). IR (KBr): 3058, 3027, 2958, 2918, 2848, 2226, 1609, 1586, 1522, 1438, 1414, 1355, 1293, 1242, 1170, 1094, 1018, 959, 941, 921, 898, 838, 810, 752, 723, 696, 677  $\text{cm}^{-1}$ . HRMS-ESI (m/z) calcd. for  $[\text{C}_{16}\text{H}_{14}\text{FN}_2\text{Se}]^+$  ( $[\text{M} + \text{H}]^+$ ):



333.0301; found: 338.0302.

Piperidine-1-carboselenoyl fluoride (**3g**)

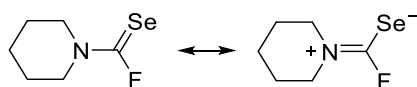

Yellow brown oil (24.9 mg, 64%), a mixture of petroleum ether/ethyl acetate = 40/1 (v/v) as eluents for column chromatography. <sup>1</sup>H NMR (500 MHz, CDCl<sub>3</sub>) δ 4.05 (t, *J* = 5.6 Hz, 2H), 3.69 (t, *J* = 5.7 Hz, 2H), 1.79 (m, 2H), 1.74-1.65 (m, 4H). <sup>19</sup>F NMR (471 MHz, CDCl<sub>3</sub>) δ 24.0 (m). <sup>13</sup>C NMR (126 MHz, CDCl<sub>3</sub>) δ 183.4 (d, *J* = 350.0 Hz), 54.4 (d, *J* = 7.8 Hz), 48.1 (d, *J* = 8.2 Hz), 25.6, 24.8, 23.6. IR (KBr): 2933, 2884, 2851, 1636, 1531, 1484, 1462, 1441, 1402, 1368, 1284, 1254, 1200, 1134, 1108, 1086, 1024, 1003, 949, 906, 871, 853, 794 cm<sup>-1</sup>. HRMS-ESI (*m/z*) calcd. for [C<sub>6</sub>H<sub>11</sub>FNSe]<sup>+</sup> ([M + H]<sup>+</sup>): 196.0035; found: 196.0034.

Morpholine-4-carboselenoyl fluoride (**3h**)

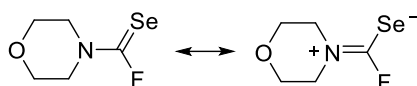

Light yellow solid (25.6 mg, 70%), a mixture of petroleum ether/ethyl acetate = 5/1 (v/v) as eluents for column chromatography. M.p.: 48.5-49.5 °C. <sup>1</sup>H NMR (500 MHz, CDCl<sub>3</sub>) δ 4.11 (t, *J* = 4.8 Hz, 2H), 3.84 (t, *J* = 4.8 Hz, 2H), 3.76-3.71 (m, 4H). <sup>19</sup>F NMR (471 MHz, CDCl<sub>3</sub>) δ 24.0 (m). <sup>13</sup>C NMR (126 MHz, CDCl<sub>3</sub>): δ 184.5 (d, *J* = 350.4 Hz), 65.7, 65.6, 52.7 (d, *J* = 7.1 Hz), 47.4 (d, *J* = 6.7 Hz). IR (KBr): 2973, 2924, 2870, 1526, 1446, 1436, 1389, 1364, 1305, 1273, 1245, 1218, 1204, 1119, 1104, 1067, 1025, 932, 884, 847, 834 cm<sup>-1</sup>. HRMS-ESI (*m/z*) calcd. for [C<sub>5</sub>H<sub>9</sub>FNSe]<sup>+</sup> ([M + H]<sup>+</sup>): 197.9828; found: 197.9832.

Thiomorpholine-4-carboselenoyl fluoride (**3i**)

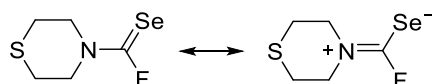

White solid (36.9 mg, 87%), a mixture of petroleum ether/ethyl acetate = 5/1 (v/v) as eluents for column chromatography. M.p.: 45.9-46.6 °C. <sup>1</sup>H NMR (500 MHz, CDCl<sub>3</sub>) δ 4.37 (m, 2H), 4.00 (m, 2H), 2.85 (t, *J* = 4.9 Hz, 2H), 2.72 (m, 2H). <sup>19</sup>F NMR (471 MHz, CDCl<sub>3</sub>) δ 25.9 (m). <sup>13</sup>C NMR (126 MHz, CDCl<sub>3</sub>) δ 184.6 (d, *J* = 350.3 Hz), 55.8 (d, *J* = 6.9 Hz), 49.8 (d, *J* = 7.6 Hz), 27.5, 26.8. IR (KBr): 3009, 2970, 2920,

2904, 1539, 1446, 1419, 1364, 1311, 1291, 1258, 1229, 1209, 1163, 1096, 1032, 948, 853  $\text{cm}^{-1}$ . HRMS-ESI ( $m/z$ ) calcd. for  $[\text{C}_5\text{H}_9\text{FNSSe}]^+$  ( $[\text{M} + \text{H}]^+$ ): 213.9599; found: 213.9607.

#### 4-Benzhydrylpiperazine-1-carboselenoyl fluoride (**3j**)

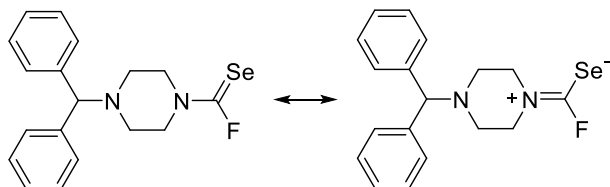

White solid (43.3 mg, 60%), a mixture of petroleum ether/ethyl acetate = 40/1 (v/v) as eluents for column chromatography. M.p.: 128.6-129.3 °C.  $^1\text{H}$  NMR (500 MHz,  $\text{CDCl}_3$ )  $\delta$  7.41 (d,  $J = 7.5$  Hz, 4H), 7.30 (t,  $J = 7.5$ , 4H), 7.22 (t,  $J = 7.4$  Hz, 2H), 4.30 (s, 1H), 4.10 (t,  $J = 5.2$  Hz, 2H), 3.73 (t,  $J = 5.1$  Hz, 2H), 2.57 (t,  $J = 5.1$  Hz, 2H), 2.46 (t,  $J = 5.2$  Hz, 2H).  $^{19}\text{F}$  NMR (471 MHz,  $\text{CDCl}_3$ )  $\delta$  23.8 (m).  $^{13}\text{C}$  NMR (126 MHz,  $\text{CDCl}_3$ )  $\delta$  183.9 (d,  $J = 349.4$  Hz), 141.4, 128.8, 127.8, 127.5, 75.5, 53.0 (d,  $J = 7.2$  Hz), 50.8, 50.5, 47.2 (d,  $J = 7.1$  Hz). IR (KBr): 3059, 3026, 2950, 2914, 2806, 2763, 1541, 1519, 1491, 1446, 1286, 1248, 1144, 1112, 1092, 1076, 1025, 989, 826, 759, 747, 706, 696  $\text{cm}^{-1}$ . HRMS-ESI ( $m/z$ ) calcd. for  $[\text{C}_{18}\text{H}_{20}\text{FN}_2\text{Se}]^+$  ( $[\text{M} + \text{H}]^+$ ): 363.0770; found: 363.0772.

#### 4-(2-Chloro-6-fluorobenzyl)piperazine-1-carboselenoyl fluoride (**3k**)

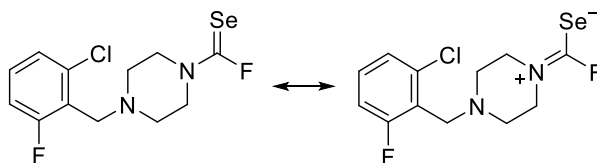

Light yellow solid (34.9 mg, 52%), a mixture of petroleum ether/ethyl acetate = 5/1 (v/v) as eluents for column chromatography. M.p.: 68.3-68.8 °C.  $^1\text{H}$  NMR (500 MHz,  $\text{CDCl}_3$ )  $\delta$  7.25-7.20 (m, 2H), 7.01 (m, 1H), 4.08 (t,  $J = 5.2$  Hz, 2H), 3.77 (d,  $J = 2.2$  Hz, 2H), 3.72 (t,  $J = 5.2$  Hz, 2H), 2.73 (t,  $J = 5.2$  Hz, 2H), 2.61 (t,  $J = 5.2$  Hz, 2H).  $^{19}\text{F}$  NMR (471 MHz,  $\text{CDCl}_3$ )  $\delta$  23.9 (m), -112.1 (s).  $^{13}\text{C}$  NMR (126 MHz,  $\text{CDCl}_3$ )  $\delta$  183.9 (d,  $J = 349.6$  Hz), 162.0 (d,  $J = 249.8$  Hz), 136.6 (d,  $J = 5.6$  Hz), 129.8 (d,  $J = 9.7$  Hz), 125.6 (d,  $J = 3.5$  Hz), 122.8 (d,  $J = 17.8$  Hz), 114.2 (d,  $J = 23.3$  Hz), 52.9 (d,  $J = 7.2$  Hz), 51.8 (d,  $J = 1.2$  Hz), 51.5, 51.2, 47.1 (d,  $J = 7.2$  Hz). IR (KBr): 3023, 2948, 2919, 2821, 2783, 1606, 1577, 1528, 1445, 1402, 1367, 1348, 1296, 1280, 1266, 1244, 1197,

1168, 1139, 1096, 1036, 993, 858, 826, 776, 721  $\text{cm}^{-1}$ . HRMS-ESI ( $m/z$ ) calcd. for  $[\text{C}_{12}\text{H}_{14}\text{ClF}_2\text{N}_2\text{Se}]^+$  ( $[\text{M} + \text{H}]^+$ ): 338.9973; found: 338.9981.

#### 4-(2,3,4-Trimethoxybenzyl)piperazine-1-carboselenoyl fluoride (**3l**)

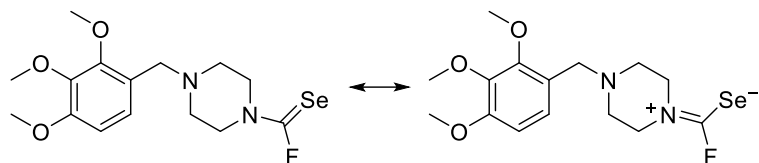

White solid (60.1 mg, 80%), a mixture of petroleum ether/ethyl acetate = 5/1 (v/v) as eluents for column chromatography. M.p.: 84.8-85.9 °C.  $^1\text{H}$  NMR (500 MHz,  $\text{CDCl}_3$ )  $\delta$  6.93 (d,  $J = 8.5$  Hz, 1H), 6.64 (d,  $J = 8.5$  Hz, 1H), 4.09 (t,  $J = 5.1$  Hz, 2H), 3.87 (s, 3H), 3.87 (s, 3H), 3.87 (s, 3H), 3.72 (t,  $J = 5.2$  Hz, 2H), 3.52 (s, 2H), 2.63 (t,  $J = 5.1$  Hz, 2H), 2.52 (t,  $J = 5.2$  Hz, 2H).  $^{19}\text{F}$  NMR (471 MHz,  $\text{CDCl}_3$ )  $\delta$  23.9 (m).  $^{13}\text{C}$  NMR (126 MHz,  $\text{CDCl}_3$ )  $\delta$  183.9 (d,  $J = 349.7$  Hz), 153.4, 152.7, 142.4, 125.2, 125.7, 107.1, 61.2, 60.8, 56.0, 56.0, 53.0 (d,  $J = 7.1$  Hz), 51.6, 51.3, 47.2 (d,  $J = 7.1$  Hz). IR (KBr): 3050, 3003, 2950, 2922, 2848, 1599, 1539, 1506, 1419, 1397, 1320, 1285, 1258, 1231, 1200, 1159, 1132, 1084, 1032, 1015, 983, 954, 899, 858, 798, 771, 739, 690  $\text{cm}^{-1}$ . HRMS-ESI ( $m/z$ ) calcd. for  $[\text{C}_{15}\text{H}_{22}\text{FN}_2\text{O}_3\text{Se}]^+$  ( $[\text{M} + \text{H}]^+$ ): 377.0774; found: 377.0790.

#### 3,4-Dihydroisoquinoline-2(1H)-carboselenoyl fluoride (**3m**)

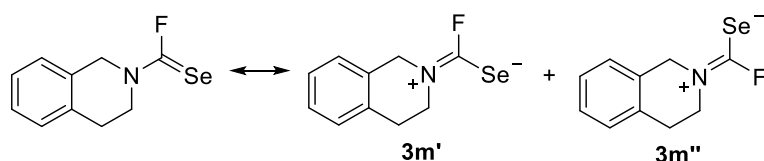

Colorless oil (30.0 mg, 62%), a mixture of petroleum ether/ethyl acetate = 10/1 (v/v) as eluents for column chromatography. M.p.: 68.8-69.3 °C.  $^1\text{H}$  NMR (500 MHz,  $\text{CDCl}_3$ , **3m'** + **3m''**)  $\delta$  7.29-7.11 (m, 4H), 5.07 (s, 1.04H), 4.81 (s, 0.92H), 4.18 (t,  $J = 6.1$  Hz, 0.93H), 3.92 (t,  $J = 6.0$  Hz, 1.07H), 3.06 (t,  $J = 6.0$  Hz, 0.93H), 2.96 (t,  $J = 6.1$  Hz, 1.07H).  $^{19}\text{F}$  NMR (471 MHz,  $\text{CDCl}_3$ , **3m'** + **3m''**)  $\delta$  27.6 (m), 25.3 (m).  $^{13}\text{C}$  NMR (126 MHz,  $\text{CDCl}_3$ , **3m'** + **3m''**)  $\delta$  184.3 (d,  $J = 349.7$  Hz), 134.0, 133.2, 130.7, 130.2, 128.5, 128.2, 127.9, 127.6, 127.3, 127.2, 126.6, 126.2, 54.2 (d,  $J = 7.9$  Hz), 51.0 (d,  $J = 7.6$  Hz), 48.3 (d,  $J = 8.1$  Hz), 45.1 (d,  $J = 6.8$  Hz), 28.4, 27.7. IR (KBr): 3065, 3026, 2926, 2900, 2850, 1588, 1518, 1507, 1493, 1453, 1371, 1345, 1284, 1250, 1235, 1217, 1173, 1090, 1048, 975, 926, 824, 749, 673  $\text{cm}^{-1}$ . HRMS-ESI ( $m/z$ ) calcd. for

$[\text{C}_{10}\text{H}_{11}\text{FNSe}]^+$  ( $[\text{M} + \text{H}]^+$ ): 242.0043; found: 242.0050.

### Isoindoline-2-carboselenoyl fluoride (**3n**)

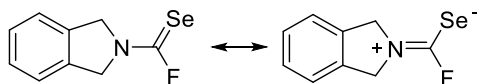

White solid (17.8 mg, 39%), a mixture of petroleum ether/ethyl acetate = 5/1 (v/v) as eluents for column chromatography. M.p.: 131.8-133.6 °C.  $^1\text{H}$  NMR (500 MHz,  $\text{CDCl}_3$ ):  $\delta$  7.39-7.33 (m, 3H), 7.26 (m, 1H), 5.03 (s, 2H), 4.94 (s, 2H).  $^{19}\text{F}$  NMR (471 MHz,  $\text{CDCl}_3$ )  $\delta$  30.3 (m).  $^{13}\text{C}$  NMR (126 MHz,  $\text{CDCl}_3$ )  $\delta$  182.9 (d,  $J = 350.8$  Hz), 134.0, 134.0, 128.6, 128.5, 122.9, 122.7, 60.1 (d,  $J = 6.4$  Hz), 54.7 (d,  $J = 2.2$  Hz). IR (KBr): 3074, 3022, 2925, 2867, 1801, 1791, 1594, 1518, 1488, 1454, 1351, 1327, 1270, 1224, 1187, 1177, 1153, 1093, 1075, 1024, 990, 920, 855, 816, 752, 738  $\text{cm}^{-1}$ . HRMS-ESI ( $m/z$ ) calcd. for  $[\text{C}_9\text{H}_9\text{FNSe}]^+$  ( $[\text{M} + \text{H}]^+$ ): 229.9879; found: 229.9884.

### Indoline-1-carboselenoyl fluoride (**3o**)

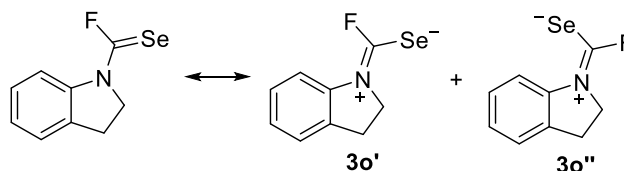

Light yellow solid (35.7 mg, 78%), a mixture of petroleum ether/ethyl acetate = 8/1 (v/v) as eluents for column chromatography. M.p.: 86.1-87.4 °C.  $^1\text{H}$  NMR (500 MHz,  $\text{CDCl}_3$ , **3o'** + **3o''**)  $\delta$  9.18 (d,  $J = 8.1$  Hz, 0.12H), 7.63 (dd,  $J = 8.1, 3.2$  Hz, 0.85H), 7.37-7.28 (m, 1.86H), 7.21 (t,  $J = 7.5$  Hz, 0.88H), 4.38 (t,  $J = 8.0$  Hz, 1.73H), 4.34 (m, 0.26H), 3.26 (t,  $J = 8.1$  Hz, 1.73H), 3.21 (t,  $J = 8.1$  Hz, 0.27H).  $^{19}\text{F}$  NMR (471 MHz,  $\text{CDCl}_3$ , **3o'** + **3o''**)  $\delta$  50.6 (m), 25.8 (m).  $^{13}\text{C}$  NMR (126 MHz,  $\text{CDCl}_3$ , **3o'** + **3o''**)  $\delta$  180.2 (d,  $J = 354.3$  Hz), 139.8, 139.7, 133.5, 128.4 (d,  $J = 3.1$  Hz), 127.3, 127.3, 126.6, 126.2, 125.2, 117.9, 117.7, 117.6 (d,  $J = 2.1$  Hz), 56.3 (d,  $J = 7.8$  Hz), 52.0 (d,  $J = 3.6$  Hz), 26.8, 26.4. IR (KBr): 3068, 2962, 2922, 2848, 1601, 1498, 1456, 1325, 1261, 1226, 1191, 1165, 1132, 1065, 990, 934, 852, 752, 721, 699  $\text{cm}^{-1}$ . HRMS-ESI ( $m/z$ ) calcd. for  $[\text{C}_9\text{H}_9\text{FNSe}]^+$  ( $[\text{M} + \text{H}]^+$ ): 229.9879; found: 229.9888.

### Methyl(naphthalen-1-ylmethyl)carbamosenoic fluoride (**3p**)

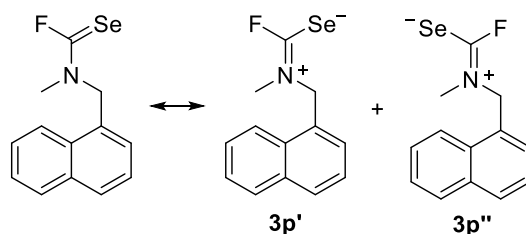

White solid (45.5 mg, 81%), a mixture of petroleum ether/ethyl acetate = 10/1 (v/v) as eluents for column chromatography. M.p.: 81.9-82.8 °C.  $^1\text{H}$  NMR (500 MHz,  $\text{CDCl}_3$ , **3p'** + **3p''**)  $\delta$  8.04 (d,  $J = 8.3$  Hz, 0.58H), 7.93-7.87 (m, 1.98H), 7.82 (d,  $J = 8.2$  Hz, 0.42H), 7.61-7.54 (m, 2.04H), 7.50-7.46 (m, 1.00H), 7.43 (d,  $J = 6.8$  Hz, 0.57H), 7.29 (d,  $J = 7.0$  Hz, 0.41H), 5.53 (s, 1.18H), 5.19 (s, 0.84H), 3.34 (s, 1.24H), 2.92 (d,  $J = 2.8$  Hz, 1.76H).  $^{19}\text{F}$  NMR (471 MHz,  $\text{CDCl}_3$ , **3p'** + **3p''**)  $\delta$  29.6 (m), 25.7 (m).  $^{13}\text{C}$  NMR (126 MHz,  $\text{CDCl}_3$ , **3p'** + **3p''**)  $\delta$  186.4 (d,  $J = 350.5$  Hz), 185.7 (d,  $J = 349.8$  Hz), 134.0, 133.9, 131.6, 130.8, 129.7, 129.6, 129.2, 129.0, 128.8, 128.4, 127.7, 127.3, 127.3, 126.5, 126.5, 126.0, 125.4, 125.3, 123.5, 122.0, 59.1 (d,  $J = 7.6$  Hz), 52.9 (d,  $J = 7.9$  Hz), 42.9 (d,  $J = 7.2$  Hz), 35.1 (d,  $J = 8.4$  Hz). IR (KBr): 3003, 2962, 2928, 2897, 2850, 2829, 1602, 1537, 1496, 1444, 1413, 1369, 1347, 1315, 1296, 1273, 1202, 1143, 1097, 1041, 1029, 994, 946, 931, 901, 815, 795, 754, 687, 671, 660  $\text{cm}^{-1}$ . HRMS-ESI (m/z) calcd. for  $[\text{C}_{13}\text{H}_{13}\text{FNSe}]^+$  ( $[\text{M} + \text{H}]^+$ ): 282.0192; found: 282.0191.

(2-Cyanoethyl)(cyclohexyl)carbamoseleonic fluoride (**3q**)

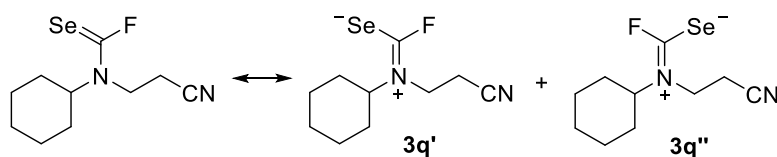

Light yellow oil (42.9 mg, 82%), a mixture of petroleum ether/ethyl acetate = 8/1 (v/v) as eluents for column chromatography.  $^1\text{H}$  NMR (500 MHz,  $\text{CDCl}_3$ , **3p'** + **3p''**)  $\delta$  4.80 (m, 0.28H), 4.10 (tm,  $J = 12.2$  Hz, 0.72H), 4.00 (t,  $J = 7.2$  Hz, 1.43H), 3.65 (td,  $J = 7.6$ , 2.4 Hz, 0.56H), 3.03 (t,  $J = 7.2$  Hz, 1.44H), 2.70 (t,  $J = 7.6$  Hz, 0.56H), 2.02-1.88 (m, 4H), 1.75-1.54 (m, 2H), 1.48-1.34 (m, 2.92H), 1.19-1.11 (m, 1.07H).  $^{19}\text{F}$  NMR (471 MHz,  $\text{CDCl}_3$ , **3p'** + **3p''**)  $\delta$  32.3 (m), 28.2 (m).  $^{13}\text{C}$  NMR (126 MHz,  $\text{CDCl}_3$ , **3p'** + **3p''**)  $\delta$  186.6 (d,  $J = 353.5$  Hz), 186.3 (d,  $J = 351.0$  Hz), 117.1, 116.0, 65.2 (d,  $J = 8.6$  Hz), 62.1 (d,  $J = 5.6$  Hz), 47.5 (d,  $J = 5.4$  Hz), 40.5 (d,  $J = 6.9$  Hz), 30.8, 29.5, 25.5, 25.4, 25.0, 24.8, 18.0 (d,  $J = 2.2$  Hz), 15.8 (d,  $J = 2.8$  Hz). IR (KBr): 2924, 2854, 2250, 1776, 1721, 1668, 1506, 1432, 1375, 1339, 1307, 1253, 1237, 1177, 1141, 1088, 1048, 1004, 942, 897, 759, 699  $\text{cm}^{-1}$ . HRMS-ESI (m/z) calcd. for  $[\text{C}_{10}\text{H}_{16}\text{FN}_2\text{Se}]^+$  ( $[\text{M}$

+ H<sup>+</sup>): 263.0457; found: 263.0457.

Di(octan-3-yl)carbamoseleonic fluoride (**3r**)

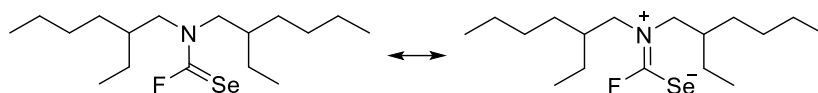

Light yellow oil (68.8 mg, 98%), a mixture of petroleum ether/ethyl acetate = 40/1 (v/v) as eluents for column chromatography. <sup>1</sup>H NMR (500 MHz, CDCl<sub>3</sub>) δ 3.72 (m, 2H), 3.40 (m, 2H), 2.07 (m, 1H), 1.72 (m, 1H), 1.42-1.20 (m, 16H), 0.93-0.87 (m, 12H). <sup>19</sup>F NMR (471 MHz, CDCl<sub>3</sub>) δ 29.7 (m). <sup>13</sup>C NMR (126 MHz, CDCl<sub>3</sub>): δ 185.9 (d, *J* = 349.6 Hz), 58.8 (d, *J* = 7.2 Hz), 54.0 (d, *J* = 5.9 Hz), 37.8, 36.5, 30.4, 30.3 (d, *J* = 1.0 Hz), 28.5, 28.4 (d, *J* = 1.6 Hz), 23.8, 23.7, 23.0, 22.9, 14.0, 14.0, 10.6, 10.5. IR (KBr): 2960, 2930, 2873, 2860, 1686, 1606, 1522, 1457, 1427, 1381, 1266, 1237, 1214, 1184, 1110, 1080, 1011, 961, 768, 728, 686 cm<sup>-1</sup>. HRMS-ESI (*m/z*) calcd. for [C<sub>17</sub>H<sub>35</sub>FNSe]<sup>+</sup> ([M + H]<sup>+</sup>): 352.1913; found: 352.1924.

4-(9-Chloro-5,6-dihydro-11*H*-benzo[5,6]cyclohepta[1,2-*b*]pyridin-11-ylidene)piperidine-1-carboselenoyl fluoride (**3s**)

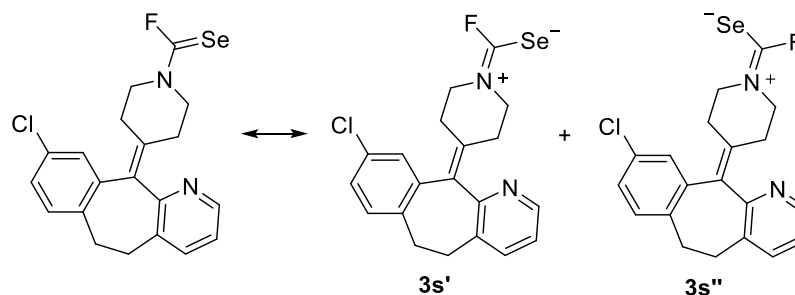

Light yellow oil (47.8 mg, 57%), dichloromethane as eluent for column chromatography. <sup>1</sup>H NMR (500 MHz, CDCl<sub>3</sub>, **3S'** + **3S''**) δ 8.40 (t, *J* = 6.0 Hz, 1H), 7.45 (d, *J* = 7.6 Hz, 1H), 7.19 (s, 1H), 7.16-7.08 (m, 3H), 4.32 (m, 1H), 3.96 (m, 1H), 3.83 (m, 1H), 3.54 (m, 1H), 3.33 (m, 2H), 2.90-2.39 (m, 6H). <sup>19</sup>F NMR (471 MHz, CDCl<sub>3</sub>, **3S'** + **3S''**) δ 24.6 (m), 24.5 (m). <sup>13</sup>C NMR (126 MHz, CDCl<sub>3</sub>, **3S'** + **3S''**) δ 183.9 (d, *J* = 350.0 Hz), 183.9 (d, *J* = 349.5 Hz), 156.1, 156.0, 146.8, 146.8, 139.7, 139.6, 138.0, 137.2, 137.1, 136.4, 136.4, 133.8, 133.7, 133.5, 133.4, 133.4, 133.3, 130.1, 130.1, 129.1, 126.4, 126.4, 122.7, 122.7, 53.6 (d, *J* = 6.8 Hz), 53.6 (d, *J* = 6.7 Hz), 47.1 (d, *J* = 7.3 Hz), 31.6 (d, *J* = 4.3 Hz), 29.9, 29.6, 29.2, 28.9. IR (KBr): 3044, 2921, 2856, 2217, 1784, 1654, 1590, 1520, 1478, 1456, 1439, 1367, 1330, 1273, 1233, 1159, 1090, 1073, 988, 926, 910, 888, 830, 785, 731, 645 cm<sup>-1</sup>. MS-ESI (*m/z*) calcd.

for  $[C_{20}H_{19}ClFN_2Se]^+$  ( $[M + H]^+$ ): 423.0382; found: 423.0382.

4-(2-Chlorodibenzo[*b,f*][1,4]oxazepin-11-yl)piperazine-1-carboselenoyl fluoride (**3t**)

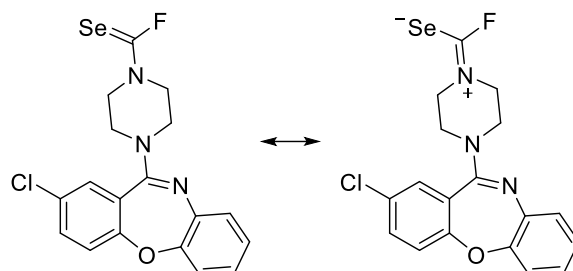

White solid (42.9 mg, 51%), a mixture of petroleum ether/ethyl acetate = 10/1 (v/v) as eluents for column chromatography. M.p.: 182.1-182.8 °C.  $^1H$  NMR (500 MHz,  $CDCl_3$ )  $\delta$  7.43 (dd,  $J = 8.7, 2.4$  Hz, 1H), 7.31 (d,  $J = 2.5$  Hz, 1H), 7.21 (d,  $J = 8.7$  Hz, 1H), 7.16-7.10 (m, 3H), 7.04 (m, 1H), 4.21 (s, 2H), 3.86 (s, 2H), 3.69 (s, 2H), 3.63 (s, 2H).  $^{19}F$  NMR (471 MHz,  $CDCl_3$ )  $\delta$  25.0 (m).  $^{13}C$  NMR (126 MHz,  $CDCl_3$ )  $\delta$  184.6 (d,  $J = 350.1$  Hz), 159.4, 158.1, 151.7, 139.4, 133.2, 130.7, 128.6, 127.2, 126.0, 125.5, 124.4, 123.0, 120.3, 52.2 (d,  $J = 7.0$  Hz), 46.5 (d,  $J = 6.8$  Hz), 46.4. IR (KBr): 3064 2923, 2835, 1606, 1592, 1562, 1538, 1471, 1445, 1402, 1284, 1257, 1235, 1208, 1185, 1167, 1144, 1098, 1012, 961, 936, 907, 871, 830, 799, 776, 752, 675  $cm^{-1}$ . RMS-ESI (m/z) calcd. for  $[C_{18}H_{16}ClFN_3OSe]^+$  ( $[M + H]^+$ ): 424.0126; found: 424.0132.

(3-(10,11-Dihydro-5*H*-dibenzo[*a,d*][7]annulen-5-ylidene)propyl)(methyl) carbamoselenoic fluoride (**3u**)

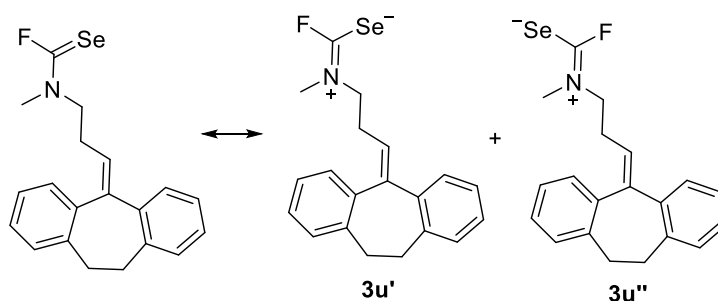

Yellow oil (67.8 mg, 91%), a mixture of petroleum ether/ethyl acetate = 10/1 (v/v) as eluents for column chromatography.  $^1H$  NMR (500 MHz,  $CDCl_3$ , **3u'** + **3u''**)  $\delta$  7.33-7.31 (m, 0.47H), 7.28-7.15 (m, 6H), 7.08 (t,  $J = 7.0$  Hz, 1.54H), 5.90 (t,  $J = 7.6$  Hz, 0.43H), 5.79 (t,  $J = 7.7$  Hz, 0.57H), 3.93 (t,  $J = 7.3$  Hz, 0.88H), 3.60 (m, 1.16H), 3.40-3.32 (m, 1.91H), 3.27 (s, 1.75H), 2.98, (m, 2.33H), 2.81 (m, 0.93H), 2.62 (q,  $J = 7.4$  Hz, 0.94H), 2.50 (m, 1.13H).  $^{19}F$  NMR (471 MHz,  $CDCl_3$ , **3u'** + **3u''**)  $\delta$  29.3 (m),

24.6 (m).  $^{13}\text{C}$  NMR (126 MHz,  $\text{CDCl}_3$ , **3u'** + **3u''**)  $\delta$  185.5 (d,  $J = 350.3$  Hz), 185.3 (d,  $J = 349.0$  Hz), 147.0, 146.2, 140.5, 140.4, 139.4, 139.4, 139.2, 137.1, 137.1, 130.3, 130.2, 128.6, 128.4, 128.4, 128.3, 128.0, 128.0, 127.9, 127.7, 127.6, 127.5, 126.2, 126.2, 126.0, 126.0, 125.5, 124.9, 57.0 (d,  $J = 7.1$  Hz), 51.5 (d,  $J = 5.8$  Hz), 43.3 (d,  $J = 7.0$  Hz), 36.5 (d,  $J = 8.7$  Hz), 33.8, 33.8, 32.1, 32.0, 27.5, 26.0. IR (KBr): 3059, 3016, 2923, 2854, 2831, 1735, 1541, 1485, 1443, 1404, 1360, 1329, 1261, 1198, 1127, 1098, 1038, 948, 890, 865, 777, 768, 757, 719, 634  $\text{cm}^{-1}$ . HRMS-ESI ( $m/z$ ) calcd. for  $[\text{C}_{20}\text{H}_{21}\text{FNSe}]^+$  ( $[\text{M} + \text{H}]^+$ ): 374.0818; found: 374.0820.

## 5. General procedures for the synthesis of selenoureas (**5**) from amines and $[\text{Me}_4\text{N}][\text{SeCF}_3]$ .

**Procedure A:** In a nitrogen-filled glovebox, a tube was charged with primary amine (**4**, 0.4 mmol),  $[\text{Me}_4\text{N}][\text{SeCF}_3]$  (**2a**, 44.3 mg, 0.2 mmol), and MeCN (2 mL) with stirring. The mixture was reacted at room temperature for 8 h and concentrated to dryness under reduced pressure. The residue was purified by column chromatography on silica gel using a mixture of petroleum ether and ethyl acetate as eluents to give the title compound (**5**).

**Procedure B:** In a nitrogen-filled glovebox, a tube was charged with  $[\text{Me}_4\text{N}][\text{SeCF}_3]$  (**2a**, 44.3 mg, 0.2 mmol), MeCN (2 mL) and aniline (**4j**, 0.2 mmol) with stirring. After 0.5 hour, **4f** (0.2 mmol) or **1a** (0.2 mmol) was added. The mixture was reacted at room temperature for another 8 h and concentrated to dryness under reduced pressure. The residue was purified by column chromatography on silica gel using a mixture of petroleum ether and ethyl acetate as eluents to give the title compound (**5**).

### 1,3-Diphenethylselenourea (**5a**)

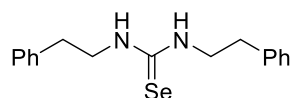

White solid (61.7 mg, 93%), a mixture of petroleum ether/ethyl acetate =5/1 (v/v) as eluents for column chromatography. M.p.: 148.9-149.6 °C.  $^1\text{H}$  NMR (500 MHz,  $\text{CDCl}_3$ )  $\delta$  7.29 (t,  $J = 7.0$  Hz, 4H), 7.23 (t,  $J = 7.3$  Hz, 2H), 7.16 (d,  $J = 7.0$  Hz, 4H), 6.62 (brs), 3.66 (brs, 4H), 2.84 (s, 4H).  $^{13}\text{C}$  NMR (126 MHz,  $\text{CDCl}_3$ )  $\delta$  179.3, 138.0, 128.9, 128.7, 126.9, 47.7 (brs), 35.0. IR (KBr): 3276, 3209, 3061, 3028, 2926, 2870, 2855, 1570, 1496, 1454, 1352, 1276, 1199, 1147, 1083, 1035, 1013, 908, 748, 698,



661  $\text{cm}^{-1}$ . HRMS-ESI ( $m/z$ ) calcd. for  $[\text{C}_{17}\text{H}_{21}\text{N}_2\text{Se}]^+$  ( $[\text{M} + \text{H}]^+$ ): 333.0864; found: 333.0872.

### 1,3-Dihexylselenourea (**5b**)

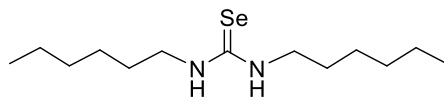

Light yellow oil (49.6 mg, 85%), a mixture of petroleum ether/ethyl acetate = 5/1 (v/v) as eluents for column chromatography.  $^1\text{H}$  NMR (500 MHz,  $\text{CDCl}_3$ )  $\delta$  6.39 (brs, 2H), 3.43 (brs, 4H), 1.59 (m, 4H), 1.33 (m, 4H), 1.30-1.26 (m, 8H), 0.86 (t,  $J = 6.9$  Hz, 6H).  $^{13}\text{C}$  NMR (126 MHz,  $\text{CDCl}_3$ )  $\delta$  178.7, 48.0 (brs), 31.4, 28.9, 26.5, 22.5, 14.0. IR (KBr): 3201, 3094, 2956, 2926, 2857, 1570, 1513, 1471, 1454, 1430, 1372, 1293, 1256, 1228, 1195, 1129, 1087, 1014, 893, 804, 731, 629  $\text{cm}^{-1}$ . HRMS-ESI ( $m/z$ ) calcd. for  $[\text{C}_{13}\text{H}_{29}\text{N}_2\text{Se}]^+$  ( $[\text{M} + \text{H}]^+$ ): 293.1490; found: 293.1491.

### *N*-(3-((2-ethylhexyl)oxy)propyl)methaneselenoamide (**5c**)

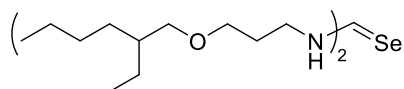

Colorless oil (52.4 mg, 94%), a mixture of petroleum ether/ethyl acetate = 3/1 (v/v) as eluents for column chromatography.  $^1\text{H}$  NMR (500 MHz,  $\text{CDCl}_3$ )  $\delta$  6.79 (brs, 2H), 3.74-3.26 (m, 12H), 1.85 (m, 4H), 1.49 (m, 2H), 1.38-1.26 (m, 16H), 0.89-0.84 (m, 12H).  $^{13}\text{C}$  NMR (126 MHz,  $\text{CDCl}_3$ )  $\delta$  178.3, 74.4, 69.6 (brs), 47.9 (brs), 39.6, 30.5, 29.1, 28.6, 23.8, 23.1, 14.1, 11.0. IR (KBr): 3231, 3058, 2957, 2928, 2859, 1558, 1495, 1464, 1378, 1299, 1271, 1242, 1205, 1107, 1042, 988, 919, 768  $\text{cm}^{-1}$ . HRMS-ESI ( $m/z$ ) calcd. for  $[\text{C}_{23}\text{H}_{49}\text{N}_2\text{O}_2\text{Se}]^+$  ( $[\text{M} + \text{H}]^+$ ): 465.2954; found: 465.5959.

### 1,3-Bis(furan-2-ylmethyl)selenourea (**5d**)

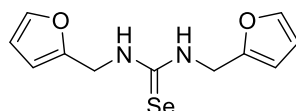

Light yellow solid (39.7 mg, 70%), a mixture of petroleum ether/ethyl acetate = 3/1 (v/v) as eluents for column chromatography. M.p.: 97.9-98.8  $^{\circ}\text{C}$ .  $^1\text{H}$  NMR (500 MHz,  $\text{CDCl}_3$ )  $\delta$  7.33 (s, 2H), 6.90 (brs), 6.31 (m, 2H), 6.28 (m, 2H), 4.65 (brs, 4H).  $^{13}\text{C}$  NMR (126 MHz,  $\text{CDCl}_3$ ):  $\delta$  180.3, 149.6, 142.6, 110.7, 108.6, 43.5 (brs). IR (KBr): 3242, 3191, 3113, 3043, 2920, 2852, 1600, 1570, 1540, 1503, 1420, 1356, 1336, 1296,

1258, 1187, 1147, 1072, 1009, 948, 907, 884, 813, 740, 720, 702, 666  $\text{cm}^{-1}$ . HRMS-ESI (m/z) calcd. for  $[\text{C}_{11}\text{H}_{13}\text{N}_2\text{O}_2\text{Se}]^+$  ( $[\text{M} + \text{H}]^+$ ): 285.0137; found: 285.0144.

1,3-Bis(2-(thiophen-2-yl)ethyl)selenourea (**5e**)

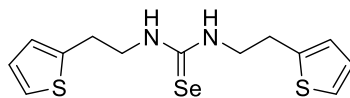

Light yellow solid (59.1 mg, 86%), a mixture of petroleum ether/ethyl acetate = 3/1 (v/v) as eluents for column chromatography. M.p.: 115.9-116.9 °C.  $^1\text{H}$  NMR (500 MHz,  $\text{CDCl}_3$ )  $\delta$  7.16 (d,  $J = 5.1$  Hz, 2H), 6.93 (m, 2H), 6.83 (d,  $J = 3.1$  Hz, 2H), 6.51 (brs), 3.69 (brs, 4H), 3.08 (t,  $J = 6.0$  Hz, 4H).  $^{13}\text{C}$  NMR (126 MHz,  $\text{CDCl}_3$ )  $\delta$  179.8 (brs), 140.3, 127.3, 125.8, 124.4, 47.6 (brs), 29.3. IR (KBr): 3256, 3081, 2925, 2852, 1559, 1504, 1451, 1424, 1361, 1342, 1322, 1276, 1255, 1230, 1188, 1105, 980, 886, 846, 741  $\text{cm}^{-1}$ . HRMS-ESI (m/z) calcd. for  $[\text{C}_{13}\text{H}_{17}\text{N}_2\text{S}_2\text{Se}]^+$  ( $[\text{M} + \text{H}]^+$ ): 344.9993; found: 344.9998.

1,3-Bis(2-(benzo[d][1,3]dioxol-5-yl)ethyl)selenourea (**5f**)

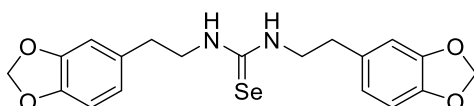

White solid (52.9 mg, 63%), a mixture of petroleum ether/ethyl acetate = 3/1 (v/v) as eluents for column chromatography. M.p.: 130.0-131.6 °C.  $^1\text{H}$  NMR (500 MHz,  $\text{CDCl}_3$ )  $\delta$  6.72 (d,  $J = 7.8$  Hz, 2H), 6.64 (s, 2H), 6.60 (d,  $J = 7.6$  Hz, 2H), 5.91 (s, 4H), 3.66 (brs, 4H), 2.76 (s, 4H).  $^{13}\text{C}$  NMR (126 MHz,  $\text{CDCl}_3$ )  $\delta$  179.4 (brs), 148.1, 146.6, 131.6 (brs), 121.7, 109.0, 108.6, 101.1, 48.3 (brs), 34.7. IR (KBr): 3276, 3207, 3059, 2930, 2897, 1607, 1570, 1505, 1493, 1445, 1348, 1271, 1250, 1189, 1121, 1101, 1043, 1014, 925, 869, 813, 776, 670  $\text{cm}^{-1}$ . HRMS-ESI (m/z) calcd. for  $[\text{C}_{19}\text{H}_{21}\text{N}_2\text{O}_4\text{Se}]^+$  ( $[\text{M} + \text{H}]^+$ ): 421.0661; found: 421.0665.

1,3-Dicyclohexylselenourea (**5g**)<sup>4</sup>

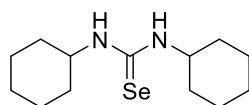

White solid (39.7 mg, 69%), a mixture of petroleum ether/ethyl acetate = 3/1 (v/v) as eluents for column chromatography.  $^1\text{H}$  NMR (500 MHz,  $\text{CDCl}_3$ )  $\delta$  5.99 (brs, 2H), 3.87 (brs, 2H), 3.31 (s, 4H), 1.72 (m, 4H), 1.62 (m, 2H), 1.37 (m, 4H), 1.26-1.14 (m,

6H).  $^{13}\text{C}$  NMR (126 MHz,  $\text{CDCl}_3$ )  $\delta$  175.9, 54.5 (brs), 32.7, 25.3, 24.6.

1,3-Di((3*S*,5*S*,7*S*)-adamantan-1-yl)selenourea (**5h**)

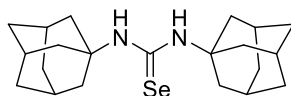

White solid (31.4 mg, 40%), a mixture of petroleum ether/ethyl acetate = 10/1 (v/v) as eluents for column chromatography. M.p.: 144.2-145.6 °C.  $^1\text{H}$  NMR (500 MHz,  $\text{CDCl}_3$ )  $\delta$  2.12 (s, 6H), 2.02 (s, 12H), 1.66 (m, 12H).  $^{13}\text{C}$  NMR (126 MHz,  $\text{CDCl}_3$ )  $\delta$  59.2, 43.3, 34.5, 29.1. IR (KBr): 3348, 2913, 2852, 2157, 2109, 2039, 1990, 1626, 1554, 1451, 1353, 1344, 1303, 1265, 1186, 1102, 1077, 933, 812, 735, 636  $\text{cm}^{-1}$ . HRMS-ESI (m/z) calcd. for  $[\text{C}_{21}\text{H}_{33}\text{N}_2\text{Se}]^+$  ( $[\text{M} + \text{H}]^+$ ): 393.1803; found: 393.1809.

1,3-Diphenylselenourea (**5i**)<sup>5</sup>

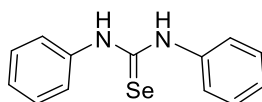

White solid (51.8 mg, 94%). The residue (crude product) was washed with DCM (ca. 5 mL) and water (ca. 5 mL) and dried to give the pure product (without column chromatography).  $^1\text{H}$  NMR (500 MHz,  $\text{DMSO}-d_6$ )  $\delta$  10.15 (s, 2H), 7.39 (m, 4H), 7.33 (m, 4H), 7.17 (m, 2H).  $^{13}\text{C}$  NMR (126 MHz,  $\text{DMSO}-d_6$ )  $\delta$  179.1, 140.2, 129.0, 125.7, 125.1.

1,3-Bis(4-methoxyphenyl)selenourea (**5j**)<sup>5</sup>

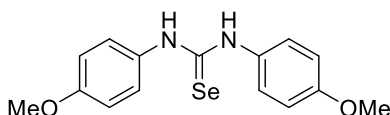

White solid (53.7 mg, 80%). The residue (crude product) was washed with DCM (ca. 5 mL) and water (ca. 5 mL) and dried to give the pure product (without column chromatography).  $^1\text{H}$  NMR (500 MHz,  $\text{DMSO}-d_6$ )  $\delta$  9.75 (s, 2H), 7.25 (d,  $J = 8.4$  Hz, 4H), 6.90 (d,  $J = 8.5$  Hz, 4H), 3.74 (s, 6H).  $^{13}\text{C}$  NMR (126 MHz,  $\text{DMSO}-d_6$ )  $\delta$  179.2, 157.5, 133.0, 127.4, 114.2, 55.7.

1-Phenyl-3-(2-(thiophen-2-yl)ethyl)selenourea (**5k**)

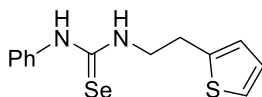

Light yellow solid (19.8 mg, 32%), a mixture of petroleum ether/ethyl acetate = 10/1 (v/v) as eluents for column chromatography. M.p.: 66.8-67.9 °C. <sup>1</sup>H NMR (500 MHz, CDCl<sub>3</sub>) δ 8.48 (brs, 1H), 7.35 (t, *J* = 7.8 Hz, 2H), 7.28 (t, *J* = 7.3 Hz, 1H), 7.14 (d, *J* = 5.1 Hz, 1H), 7.04 (d, *J* = 7.7 Hz, 2H), 6.89 (t, *J* = 3.6 Hz, 1H), 6.76 (s, 1H), 6.36 (brs, 1H), 3.97 (q, *J* = 6.0 Hz, 2H), 3.17 (t, *J* = 6.4 Hz, 2H). <sup>13</sup>C NMR (126 MHz, CDCl<sub>3</sub>) δ 178.8, 140.6, 135.5, 130.3, 127.8, 127.1, 125.8, 125.2, 124.3, 49.0, 29.2. IR (KBr): 3259, 3146, 2993, 2958, 2925, 2112, 2066, 1626, 1591, 1551, 1523, 1496, 1449, 1414, 1316, 1243, 1218, 1164, 1137, 1095, 1058, 1006, 936, 912, 811, 782, 726, 692 cm<sup>-1</sup>. HRMS-ESI (*m/z*) calcd. for [C<sub>13</sub>H<sub>15</sub>N<sub>2</sub>SSe]<sup>+</sup> ([M + H]<sup>+</sup>): 311.0116; found: 311.0122.

#### 1,1-Dibenzyl-3-phenylselenourea (**5l**)

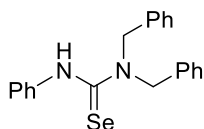

Light yellow solid (22.8 mg, 30%), a mixture of petroleum ether/ethyl acetate = 10/1 (v/v) as eluents for column chromatography. M.p.: 129.3-130.1 °C. <sup>1</sup>H NMR (500 MHz, CDCl<sub>3</sub>) δ 7.42-7.34 (m, 10H), 7.31 (t, *J* = 7.6 Hz, 2H), 7.22 (t, *J* = 7.4 Hz, 1H), 7.17 (d, *J* = 8.0 Hz, 2H), 5.16 (brs, 4H). <sup>13</sup>C NMR (126 MHz, CDCl<sub>3</sub>) δ 184.2, 140.4, 134.9 (brs), 129.2, 128.7, 128.3, 127.2, 126.7, 126.5, 56.1 (brs). IR (KBr): 3206, 3061, 3029, 2938, 2847, 1590, 1526, 1495, 1449, 1403, 1364, 1337, 1301, 1223, 1076, 1029, 1009, 961, 936, 898, 852, 791, 759, 730, 693 cm<sup>-1</sup>. HRMS-ESI (*m/z*) calcd. for [C<sub>21</sub>H<sub>21</sub>N<sub>2</sub>Se]<sup>+</sup> ([M + H]<sup>+</sup>): 381.0864; found: 381.0868.

## 6. General procedure for the synthesis of cycloselenoureas and their derivatives (**7**) from [Me<sub>4</sub>N][SeCF<sub>3</sub>].

In a nitrogen-filled glovebox, a tube was charged with diamine, aminoalcohol, aminothiols, dithiol or diol (**6**, 0.2 mmol), [Me<sub>4</sub>N][SeCF<sub>3</sub>] (**2a**, 44.3 mg, 0.2 mmol), and MeCN (2 mL) with stirring. The mixture was reacted at room temperature for 8 h and concentrated to dryness under reduced pressure. The residue was purified by column chromatography on silica gel using a mixture of petroleum ether and ethyl acetate as eluents to give the title compound (**7**).

Tetrahydropyrimidine-2(1*H*)-selenone (**7a**)<sup>6</sup>

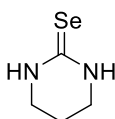

Light pink solid (7.9 mg, 24%), a mixture of petroleum ether/ethyl acetate = 3/1 (v/v) as eluents for column chromatography. <sup>1</sup>H NMR (500 MHz, DMSO-*d*<sub>6</sub>) δ 8.23 (s, 2H), 3.07 (t, *J* = 6.0 Hz, 4H), 1.74 (m, 2H). <sup>13</sup>C NMR (126 MHz, DMSO-*d*<sub>6</sub>) δ 169.6, 40.5, 19.2.

3,4-Dihydroquinazoline-2(1*H*)-selenone (**7b**)<sup>6</sup>

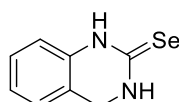

Yellow solid (39.8 mg, 94%), a mixture of petroleum ether/ethyl acetate = 3/1 (v/v) as eluents for column chromatography. <sup>1</sup>H NMR (500 MHz, DMSO-*d*<sub>6</sub>) δ 10.69 (s, 1H), 9.05 (s, 1H), 7.17 (t, *J* = 7.4 Hz, 1H), 7.07 (d, *J* = 7.3 Hz, 1H), 7.01-6.97 (m, 2H), 4.36 (s, 2H). <sup>13</sup>C NMR (126 MHz, DMSO-*d*<sub>6</sub>) δ 171.2, 134.9, 128.6, 126.7, 124.0, 117.7, 114.6, 43.9.

1*H*-Perimidine-2(3*H*)-selenone (**7c**)<sup>7</sup>

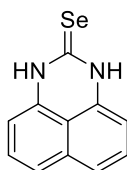

Pale yellow solid (36.7 mg, 78%), a mixture of petroleum ether/ethyl acetate = 5/1 (v/v) as eluents for column chromatography. <sup>1</sup>H NMR (500 MHz, DMSO-*d*<sub>6</sub>) δ 11.75 (s, 2H), 7.24 (t, *J* = 7.6 Hz, 2H), 7.20 (d, *J* = 8.2 Hz, 2H), 6.67 (d, *J* = 7.1 Hz, 2H). <sup>13</sup>C NMR (126 MHz, DMSO-*d*<sub>6</sub>) δ 170.0, 135.2, 134.5, 128.8, 120.0, 117.3, 105.4.

1,3-Oxazinane-2-selenon (**7d**)

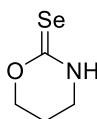

Yellow solid (16.2 mg, 49%), a mixture of petroleum ether/ethyl acetate = 1/1 (v/v) as eluents for column chromatography. M.p.: 135.9-141.5 °C. <sup>1</sup>H NMR (500 MHz, DMSO-*d*<sub>6</sub>) δ 10.17 (s, 1H), 4.28 (t, *J* = 5.2 Hz, 2H), 3.13 (t, *J* = 5.8 Hz, 2H), 1.96 (m,

2H).  $^{13}\text{C}$  NMR (126 MHz,  $\text{DMSO-}d_6$ )  $\delta$  184.6, 68.7, 40.4, 19.7. IR (KBr): 3439, 3246, 3187, 3044, 2909, 2840, 1571, 1503, 1420, 1336, 1296, 1147, 1072, 1010, 948, 907, 813, 740, 720  $\text{cm}^{-1}$ . HRMS-ESI ( $m/z$ ) calcd. for  $[\text{C}_4\text{H}_8\text{NOSe}]^+$  ( $[\text{M} + \text{H}]^+$ ): 165.9766; found: 165.9766.

1,4-Dihydro-2H-benzo[*d*][1,3]oxazine-2-selenone (**7e**)

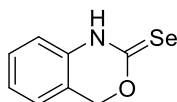

White solid (37.4 mg, 88%), a mixture of petroleum ether/ethyl acetate = 3/1 (v/v) as eluents for column chromatography. M.p.: 151.3-152.2  $^{\circ}\text{C}$ .  $^1\text{H}$  NMR (500 MHz,  $\text{DMSO-}d_6$ )  $\delta$  12.72 (s, 1H), 7.32 (t,  $J = 7.4$  Hz, 1H), 7.22 (d,  $J = 7.4$  Hz, 1H), 7.17 (t,  $J = 7.4$  Hz, 1H), 7.08 (d,  $J = 7.8$  Hz, 1H), 5.40 (s, 2H).  $^{13}\text{C}$  NMR (126 MHz,  $\text{DMSO-}d_6$ )  $\delta$  186.1, 132.7, 129.7, 125.6, 125.3, 119.1, 114.4, 69.1. IR (KBr): 3172, 3131, 3105, 3010, 2964, 2938, 1625, 1602, 1534, 1494, 1450, 1423, 1323, 1235, 1222, 1143, 1101, 953, 943, 887, 838, 757, 707  $\text{cm}^{-1}$ . HRMS-ESI ( $m/z$ ) calcd. for  $[\text{C}_8\text{H}_8\text{NOSe}]^+$  ( $[\text{M} + \text{H}]^+$ ): 213.9766; found: 213.9772.

3,4-Dihydro-2H-benzo[*e*][1,3]oxazine-2-selenone (**7f**)

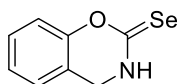

White solid (21.3 mg, 50%), a mixture of petroleum ether/ethyl acetate = 3/1 (v/v) as eluents for column chromatography. M.p.: 121.5-123.1  $^{\circ}\text{C}$ .  $^1\text{H}$  NMR (500 MHz,  $\text{DMSO-}d_6$ )  $\delta$  11.0 (s, 1H), 7.34 (t,  $J = 7.0$  Hz, 1H), 7.25-7.20 (m, 2H), 7.14 (d,  $J = 8.0$  Hz, 1H), 4.39 (s, 2H).  $^{13}\text{C}$  NMR (126 MHz,  $\text{DMSO-}d_6$ )  $\delta$  182.1, 148.0, 129.6, 127.3, 126.0, 117.2, 115.9, 41.9. IR (KBr): 3157, 3101, 3050, 2968, 2917, 2854, 1718, 1627, 1595, 1577, 1487, 1461, 1454, 1425, 1351, 1269, 1223, 1188, 1145, 1094, 1007, 935, 913, 773, 749  $\text{cm}^{-1}$ . HRMS-ESI ( $m/z$ ) for  $[\text{C}_8\text{H}_8\text{NOSe}]^+$  ( $[\text{M} + \text{H}]^+$ ): 213.9766; found: 213.9766.

Oxazolidine-2-selenone (**7g**)<sup>8</sup>

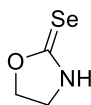

Light pink solid (13.6 mg, 45%), ethyl acetate as eluent for column chromatography.

$^1\text{H}$  NMR (500 MHz,  $\text{DMSO-}d_6$ )  $\delta$  10.65 (s, 1H), 4.61 (t,  $J = 9.0$  Hz, 2H), 3.62 (t,  $J = 9.0$  Hz, 2H).  $^{13}\text{C}$  NMR (126 MHz,  $\text{DMSO-}d_6$ )  $\delta$  187.3, 71.7, 45.2.

3,3a,4,8b-Tetrahydro-2*H*-indeno[2,1-*d*]oxazole-2-selenone (**7h**)

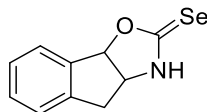

Light brown solid (31.0 mg, 65%), a mixture of petroleum ether/ethyl acetate = 1/2 (v/v) as eluents for column chromatography. M.p.: 187.3-188.9 °C.  $^1\text{H}$  NMR (500 MHz,  $\text{CDCl}_3$ )  $\delta$  8.74 (s, 1H), 7.35 (t,  $J = 7.3$  Hz, 1H), 7.31-7.27 (m, 3H), 5.74 (m, 1H), 5.37 (d,  $J = 7.7$  Hz, 1H), 3.51 (m, 2H).  $^{13}\text{C}$  NMR (126 MHz,  $\text{CDCl}_3$ )  $\delta$  188.6, 139.3, 137.7, 130.1, 128.3, 125.8, 124.8, 88.9, 66.1, 38.9. IR (KBr): 3297, 3068, 2962, 2924, 2853, 1784, 1735, 1645, 1485, 1471, 1425, 1372, 1274, 1246, 1210, 1177, 1136, 1013, 997, 928, 902, 840, 829, 752, 713, 642  $\text{cm}^{-1}$ . HRMS-ESI ( $m/z$ ) calcd. for  $[\text{C}_{10}\text{H}_{10}\text{NOSe}]^+$  ( $[\text{M} + \text{H}]^+$ ): 239.9922; found: 239.9931. *Note:* This compound is unstable under an ambient atmosphere.

Benzo[*d*]thiazole-2(3*H*)-selenone (**7i**)<sup>9</sup>

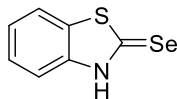

Yellow solid (13.7 mg, 32%), a mixture of petroleum ether/ethyl acetate = 5/1 (v/v) as eluents for column chromatography.  $^1\text{H}$  NMR (500 MHz,  $\text{CDCl}_3$ )  $\delta$  7.96 (d,  $J = 8.2$  Hz, 1H), 7.80 (d,  $J = 8.0$  Hz, 1H), 7.46 (t,  $J = 7.6$  Hz, 1H), 7.36 (t,  $J = 7.6$  Hz, 1H).  $^{13}\text{C}$  NMR (126 MHz,  $\text{CDCl}_3$ )  $\delta$  158.7, 155.2, 137.8, 126.4, 125.2, 122.6, 121.3.

Thiazolidine-2-selenone (**7j**)<sup>10</sup>

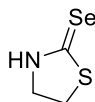

Light yellow solid (32.0 mg, 96%), a mixture of petroleum ether/ethyl acetate = 1/1 (v/v) as eluents for column chromatography.  $^1\text{H}$  NMR (500 MHz,  $\text{DMSO-}d_6$ )  $\delta$  10.85 (s, 1H), 3.83 (t,  $J = 8.1$  Hz, 2H), 3.46 (t,  $J = 8.1$  Hz, 2H).  $^{13}\text{C}$  NMR (126 MHz,  $\text{DMSO-}d_6$ )  $\delta$  195.2, 54.2, 34.4.

1,3-Dithiolane-2-selenone (**7k**)<sup>11</sup>

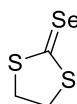

Light pink solid (17.3 mg, 47%), a mixture of petroleum ether/ethyl acetate = 5/1 (v/v) as eluents for column chromatography.  $^1\text{H}$  NMR (500 MHz,  $\text{DMSO-}d_6$ )  $\delta$  4.0 (s, 4H).  $^{13}\text{C}$  NMR (126 MHz,  $\text{DMSO-}d_6$ )  $\delta$  228.2, 47.1.

#### 4-Phenyl-1,3-dioxolane-2-selenone (**71**)

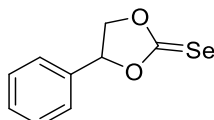

Colorless oil (9.1 mg, 20%), a mixture of petroleum ether/ethyl acetate = 1/1 (v/v) as eluents for column chromatography.  $^1\text{H}$  NMR (500 MHz,  $\text{CDCl}_3$ )  $\delta$  7.44 (d,  $J = 7.5$  Hz, 2H), 7.38 (t,  $J = 7.4$  Hz, 2H), 7.34 (t,  $J = 7.4$  Hz, 1H), 5.34 (t,  $J = 6.9$  Hz, 1H), 4.64 (m, 1H), 4.46 (t,  $J = 8.7$  Hz, 1H).  $^{13}\text{C}$  NMR (126 MHz,  $\text{CDCl}_3$ )  $\delta$  170.8, 137.2, 129.3, 128.8, 127.7, 75.1, 50.7. IR (KBr): 3061, 3032, 2954, 2925, 2893, 2848, 1747, 1723, 1694, 1491, 1460, 1452, 1372, 1277, 1243, 1196, 1180, 1066, 1039, 1013, 968, 851, 761, 702, 691  $\text{cm}^{-1}$ . HRMS-ESI ( $m/z$ ) calcd. for  $[\text{C}_9\text{H}_9\text{O}_2\text{Se}]^+$  ( $[\text{M} + \text{H}]^+$ ): 228.9762; found: 228.9775.

#### References

- [1] Tyrra, W.; Naumann, D.; Yagupolskii, Y. L. *J. Fluorine Chem.* **2003**, *123*, 183-187.
- [2] Yuan, L.; Jiang, S.-M.; Li, Z.-Z.; Zhu, J.; Li, L.; Li, M.-Z.; Tang, S.; Sheng, R.-R. *Org. Biomol. Chem.* **2018**, *16*, 2406-2410.
- [3] Armarego, W. L. F.; Chai, C. L. L. *Purification of Laboratory Chemicals*, 5<sup>th</sup> ed.; Butterworth Heinemann: Oxford, **2003**.
- [4] Koketsu, M.; Takakura, N.; Ishihara, H. *Synth. Commun.* **2002**, *32*, 3075-3079.
- [5] Pfeoffer, W.-D.; Ahlers, K.-D.; Falodun, A.; Villinger, A.; Langer, P. *Phosphorus, Sulfur, and Silicon and the Related Elements*, **2014**, *189*, 324-332.
- [6] Li, L.; Wu, J.; Wei, L.; Lu, J.; Jiang, X. *J. Org. Chem.* **2021**, *86*, 446-454.
- [7] Woodgate, P. D.; Herbert, J. M.; Denny, W. A.; *Magn. Reson. Chem.* **1988**, *26*, 191-196.
- [8] Kjaer, A.; Skrydstrup, T. *Heterocycles* **1989**, *28*, 269-273.
- [9] Alcolea, V.; Plano, D.; Encío, I.; Palop, J. A.; Sharma, A. K.; Sanmartín, C. *Eur. J. Med. Chem.* **2016**, *123*, 407-418.



[10] Devillanova, F. A.; Diaz, A.; Isaia, F.; Verani, G. *Transition Met. Chem.* **1989**, *14*, 153-154.

[11] Copeland, C. M.; Ghosh, J.; McAdam, D. P.; Skelton, B. W.; Stick, R. V.; White, A. H. *Aust. J. Chem.* **1988**, *41*, 549-561.

## 7. NMR spectra of the products

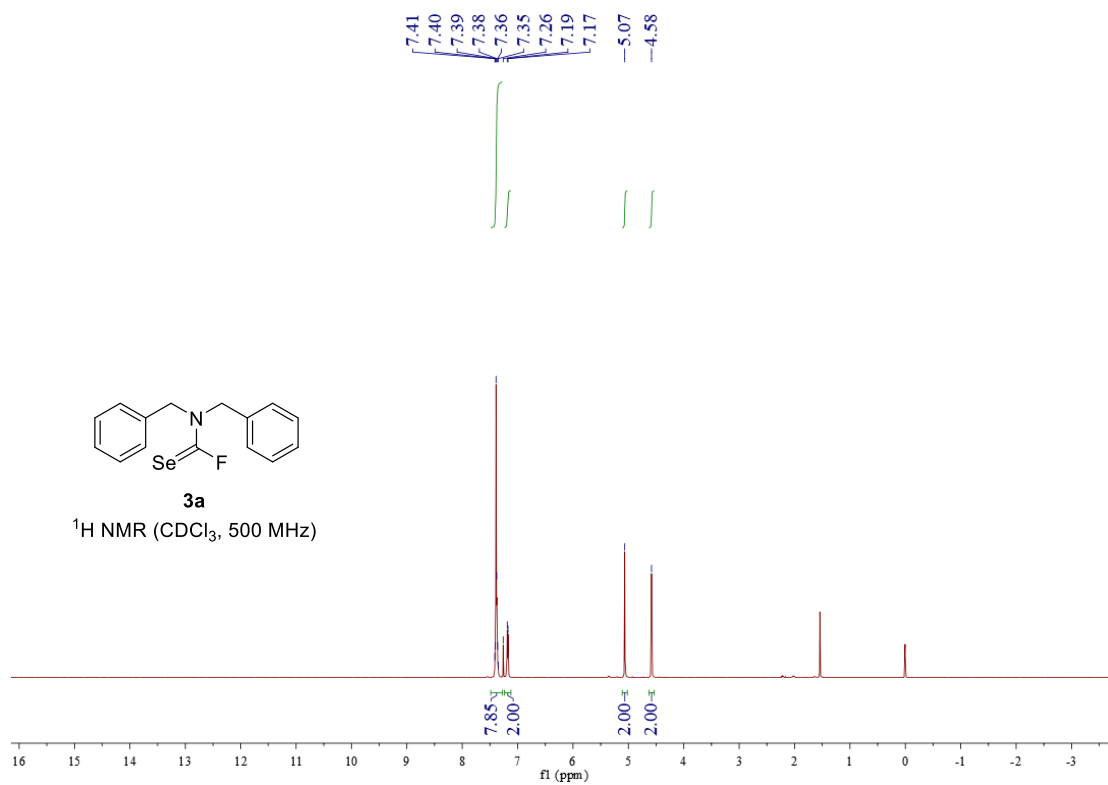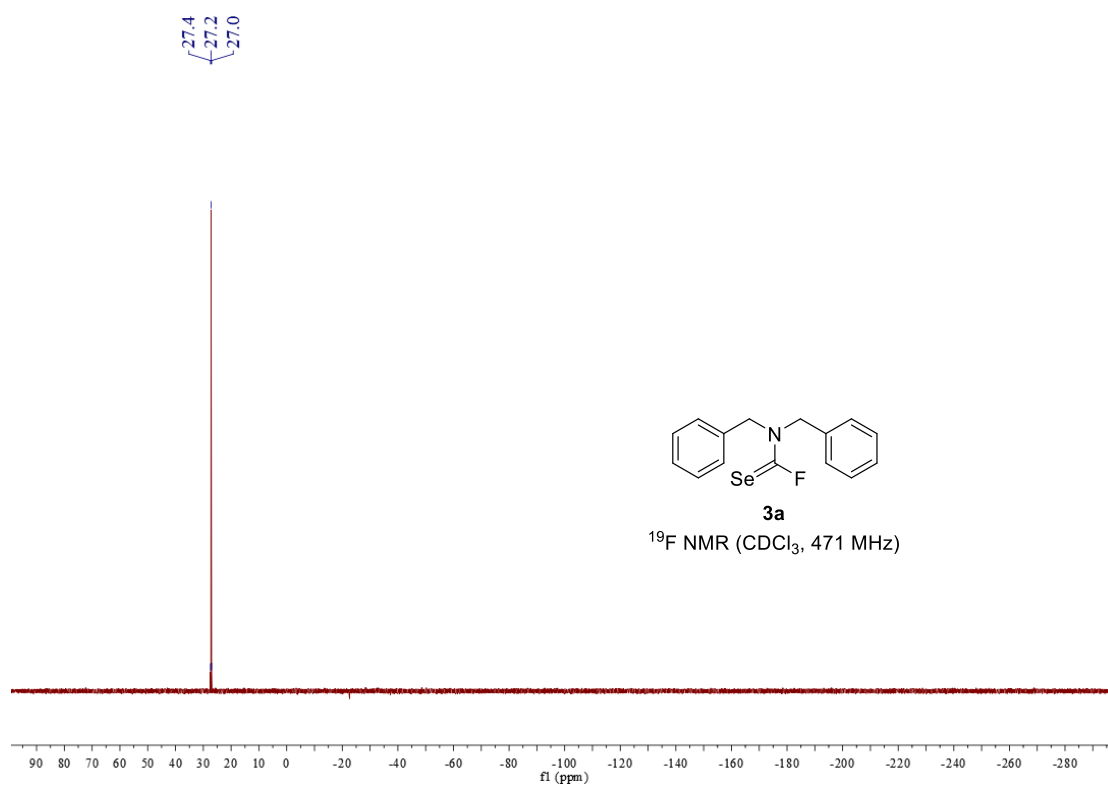

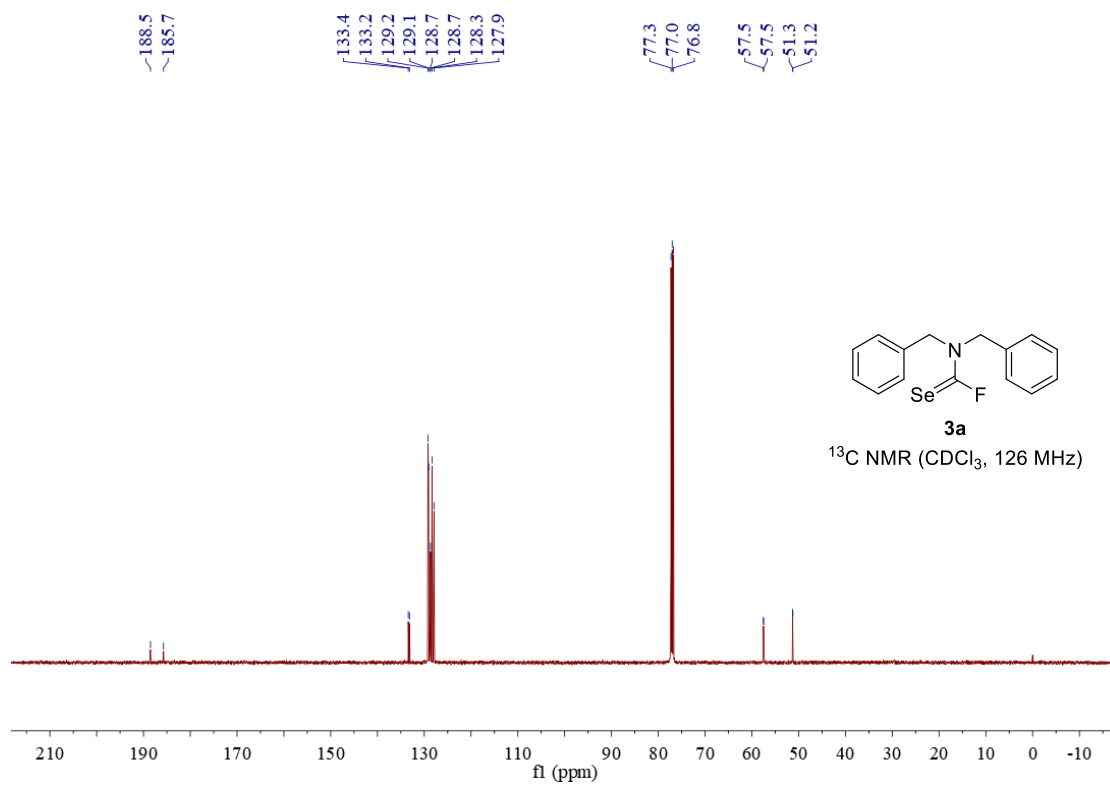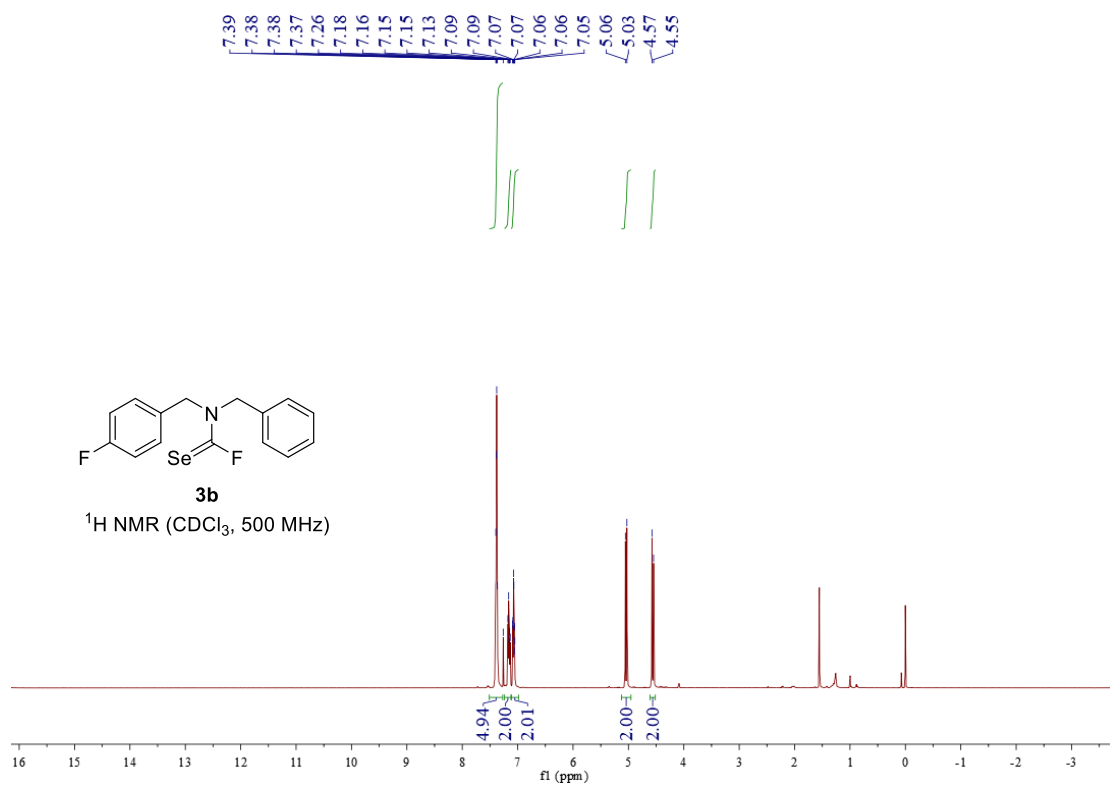

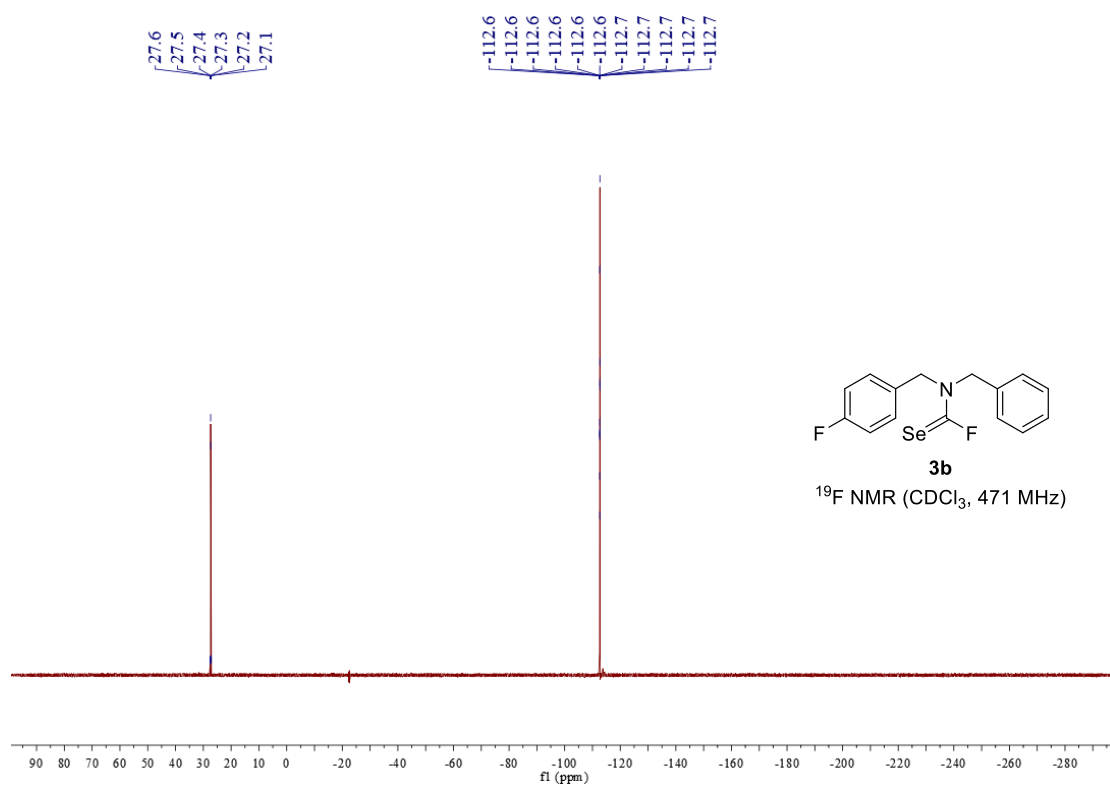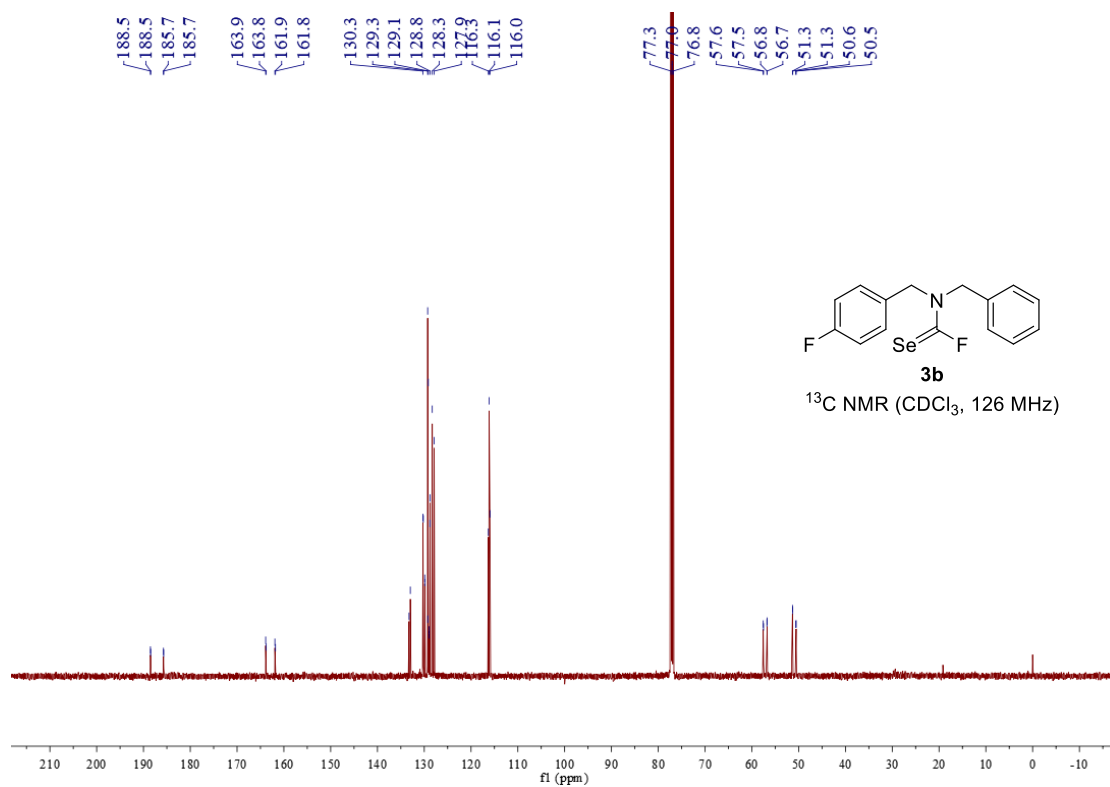

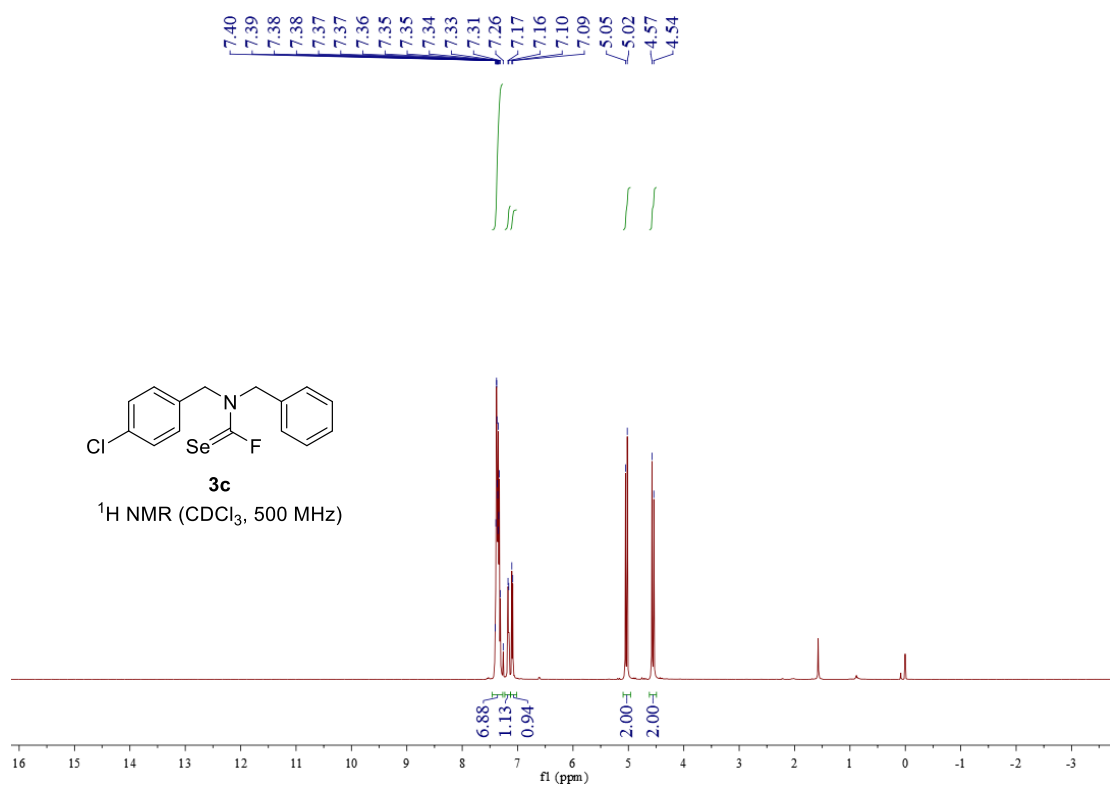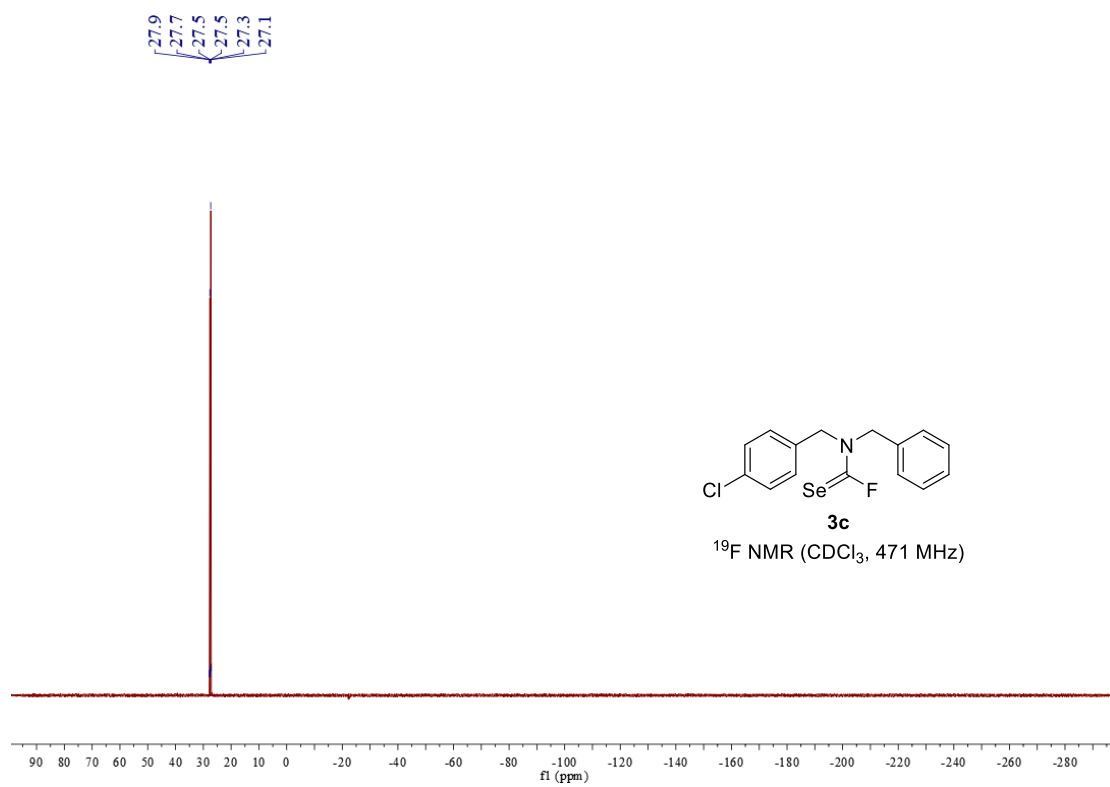

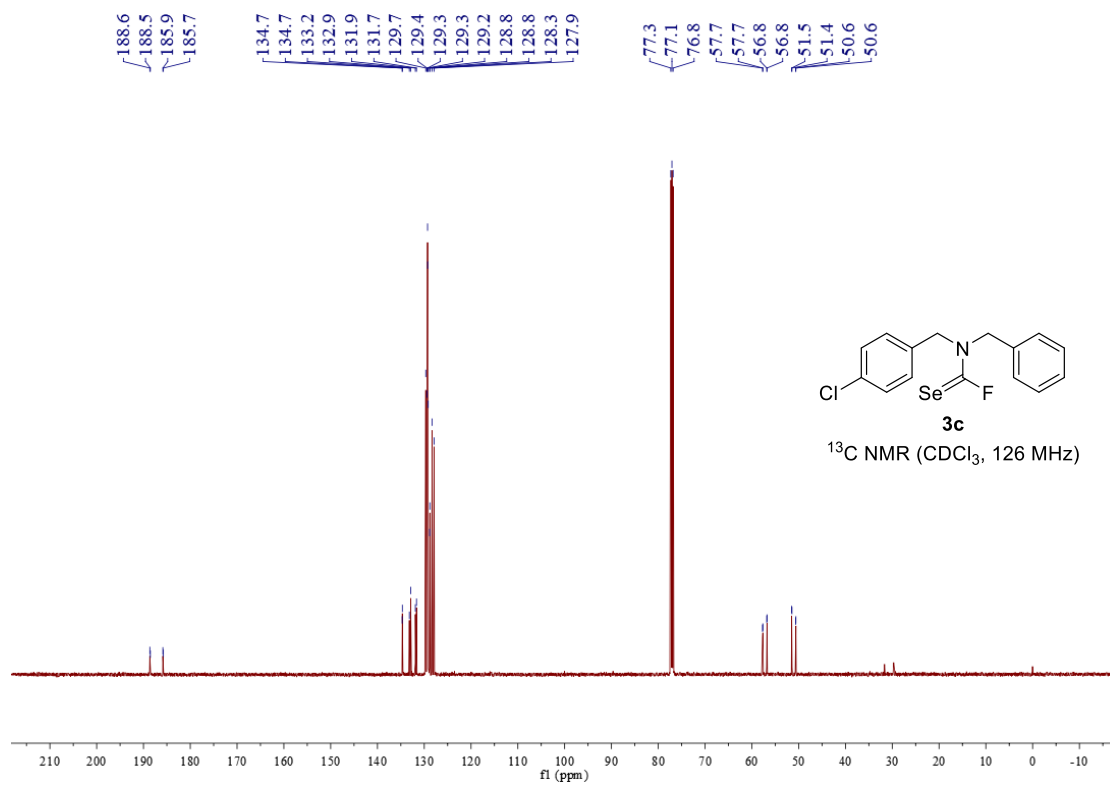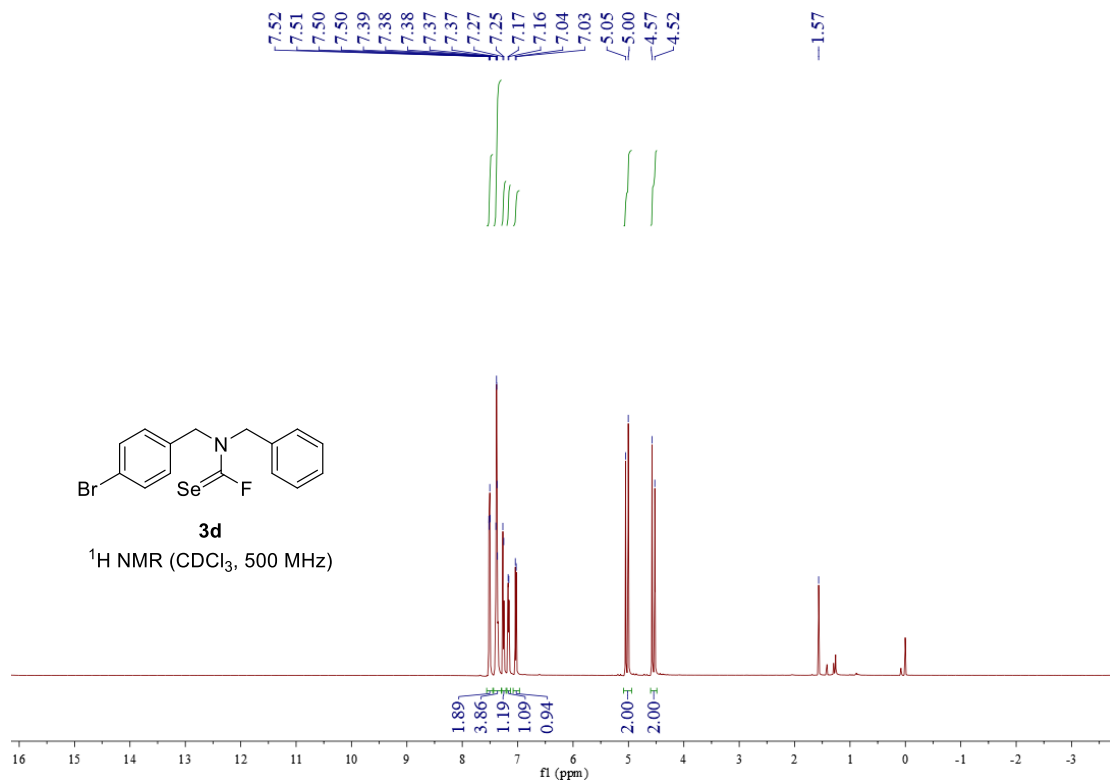

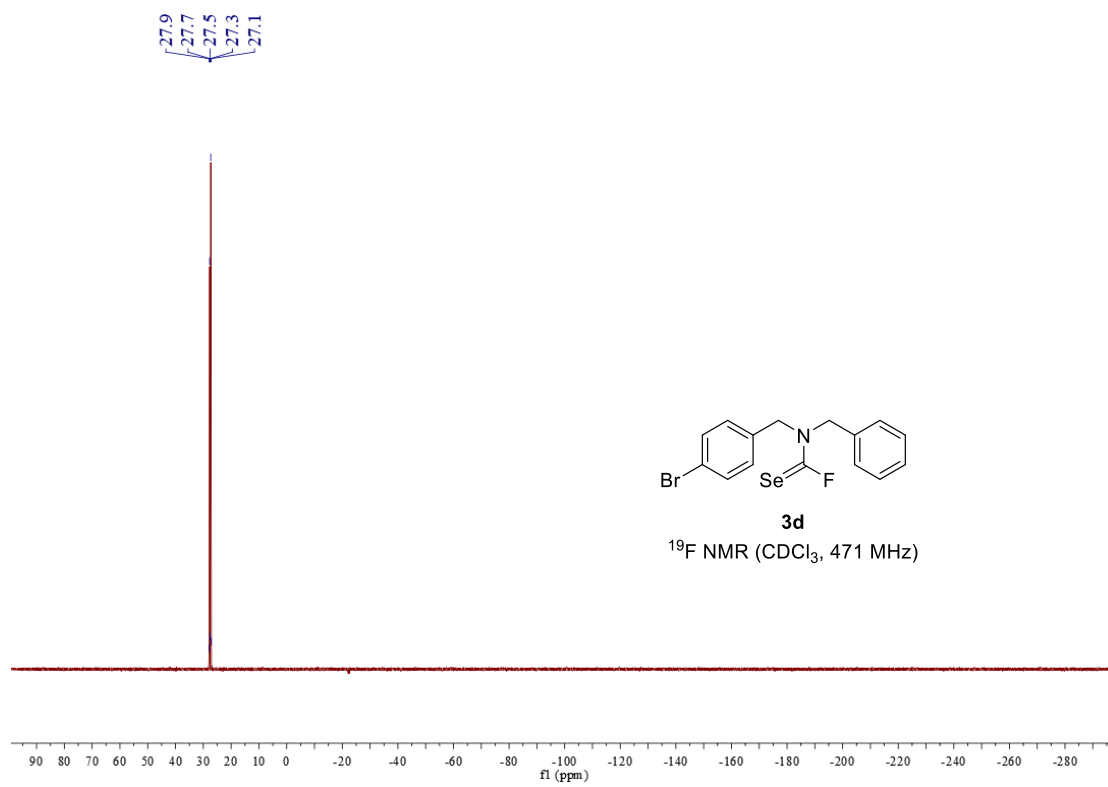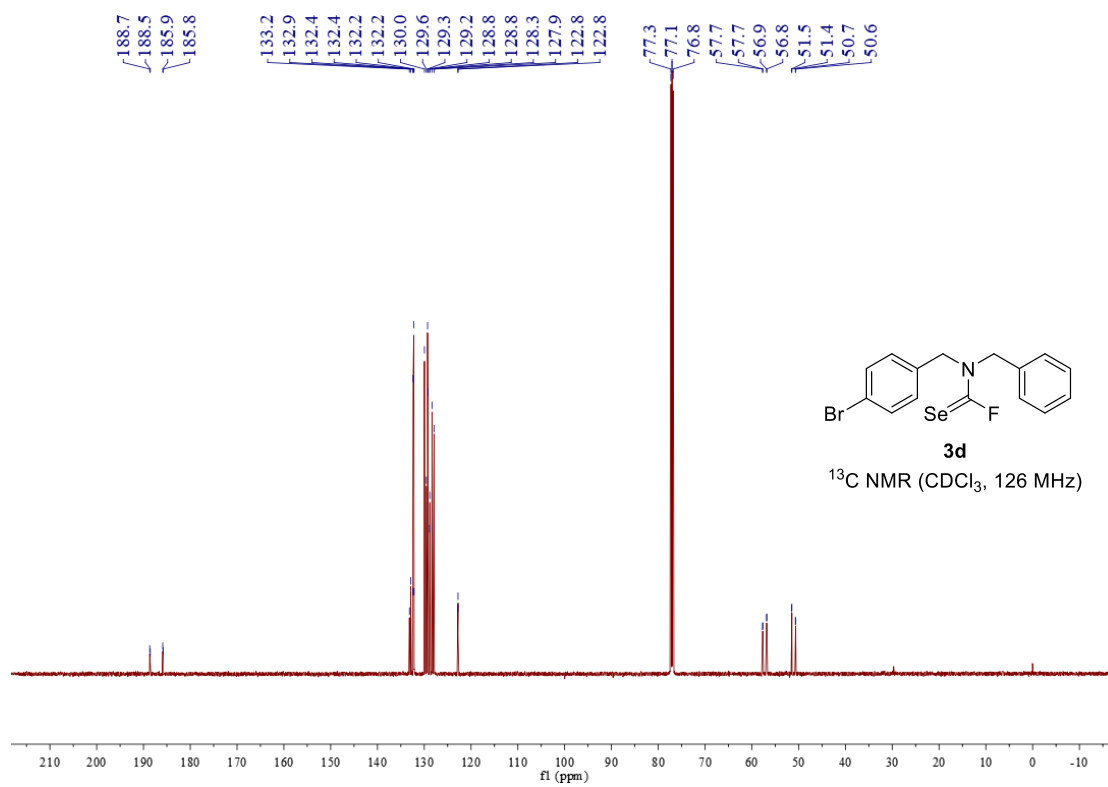

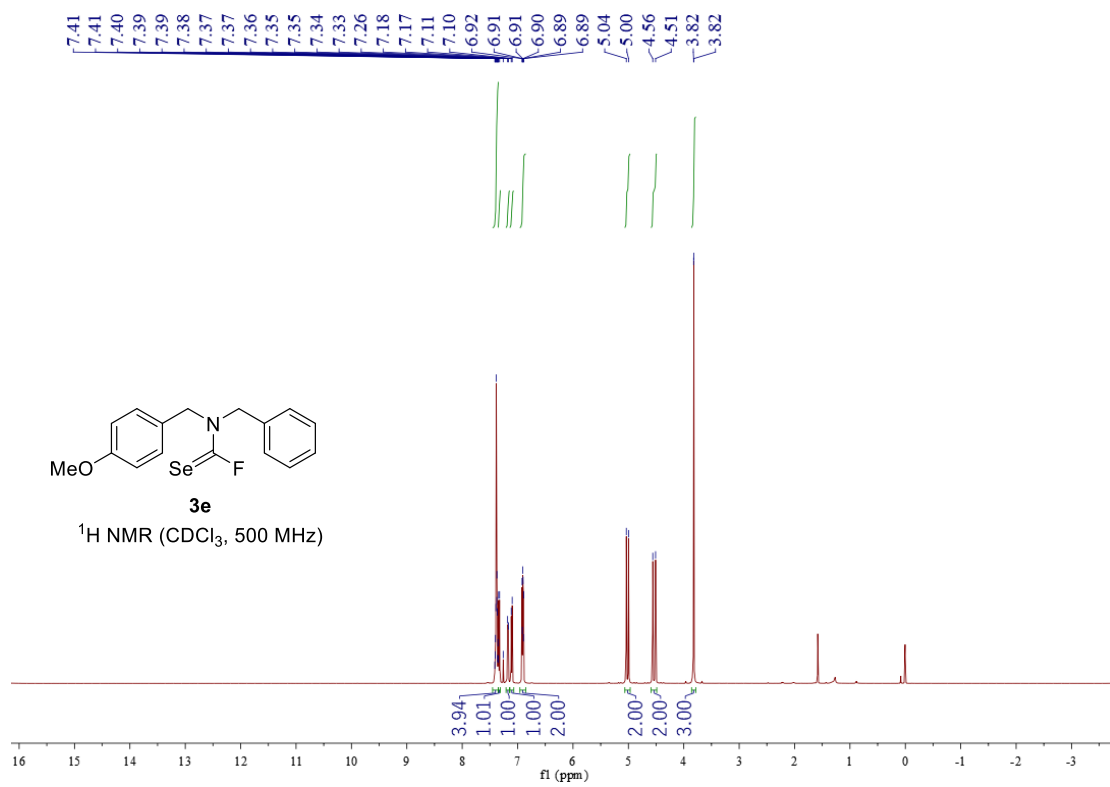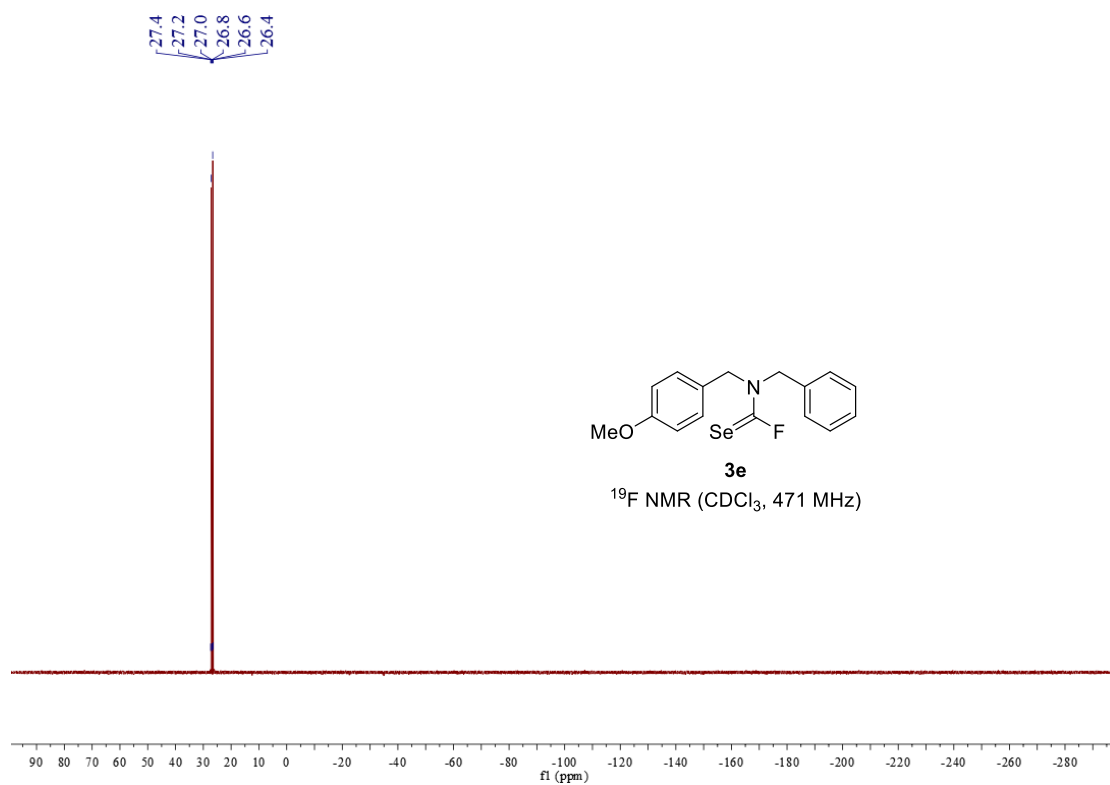



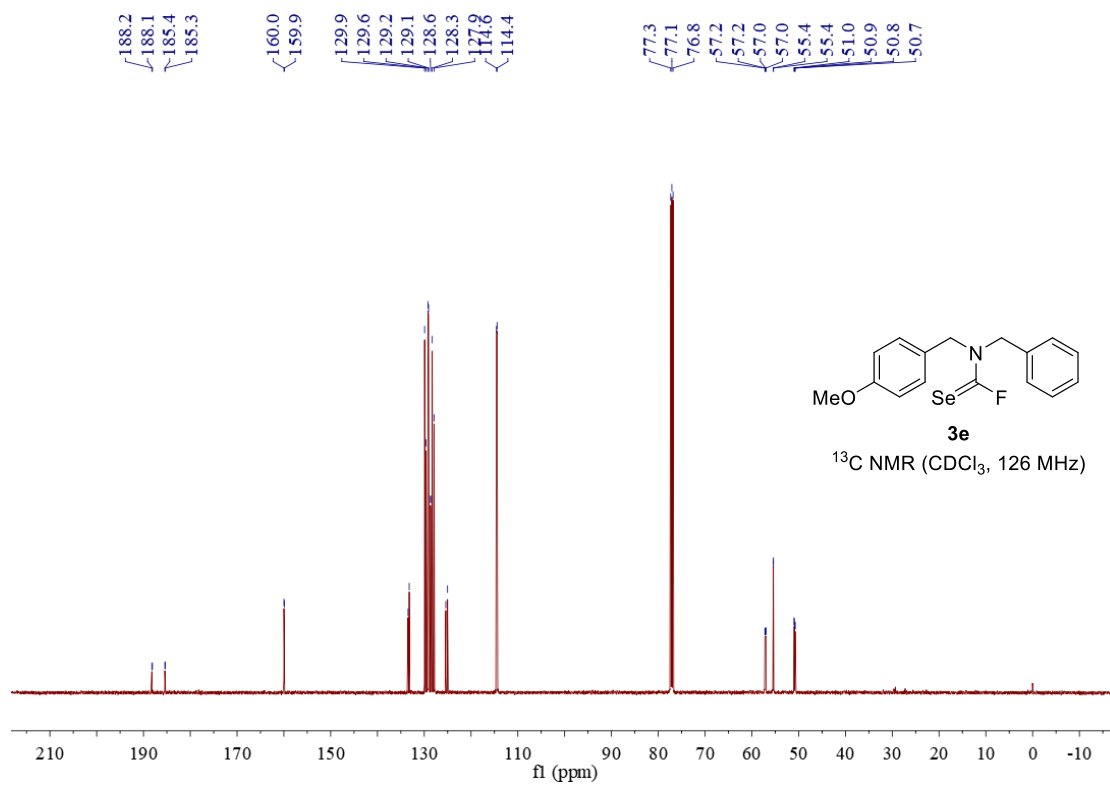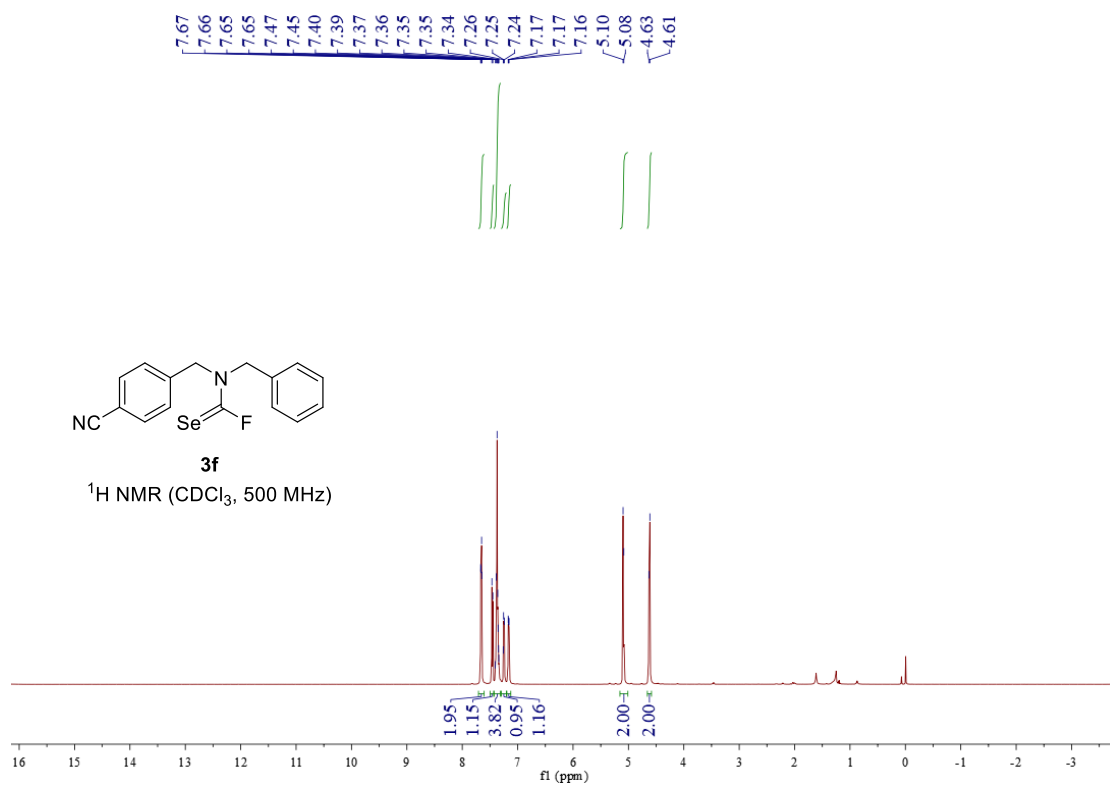

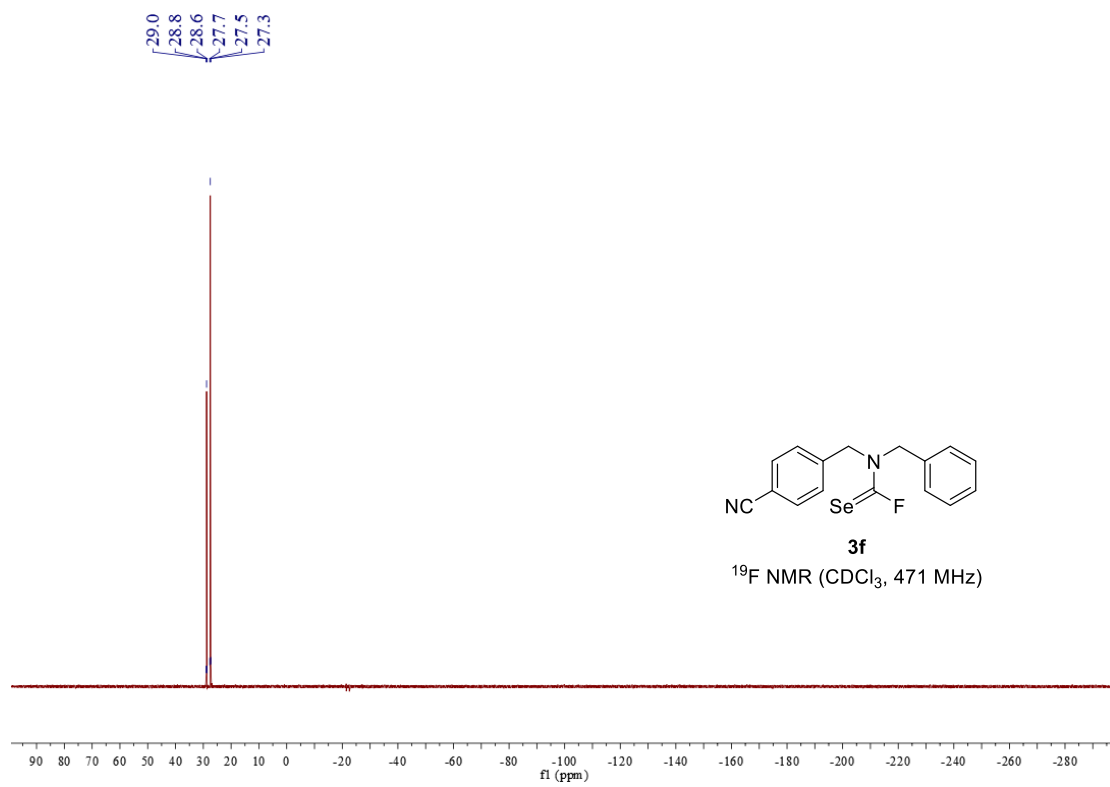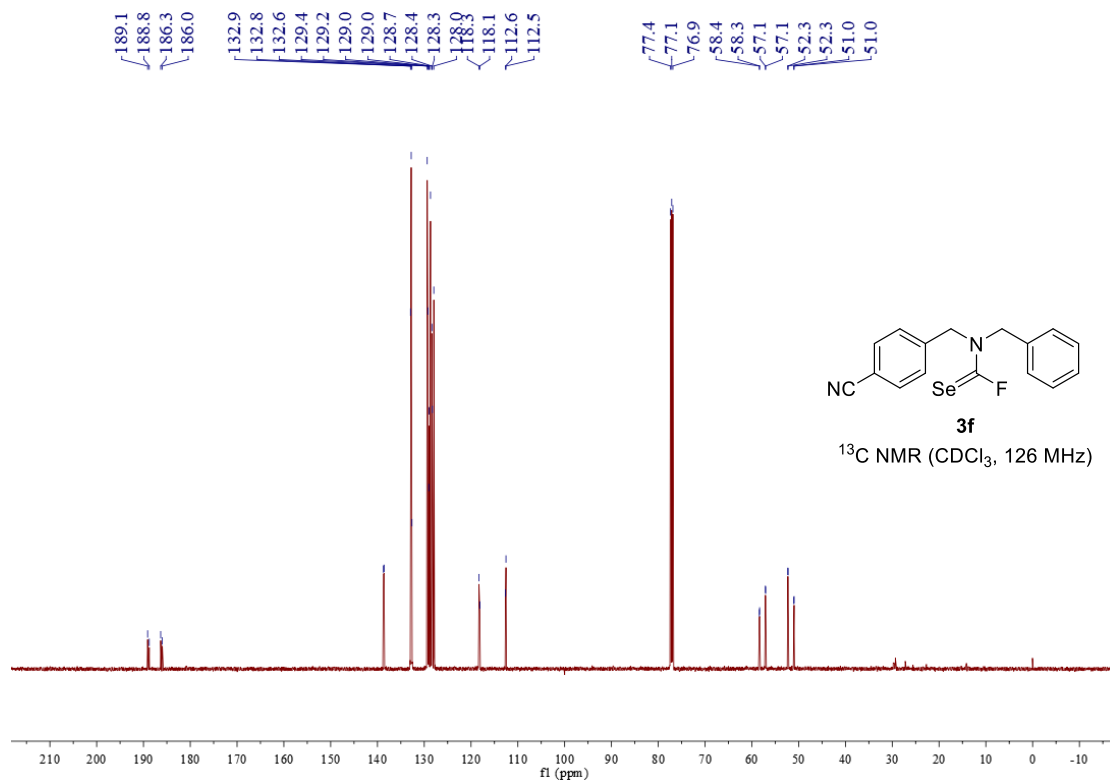

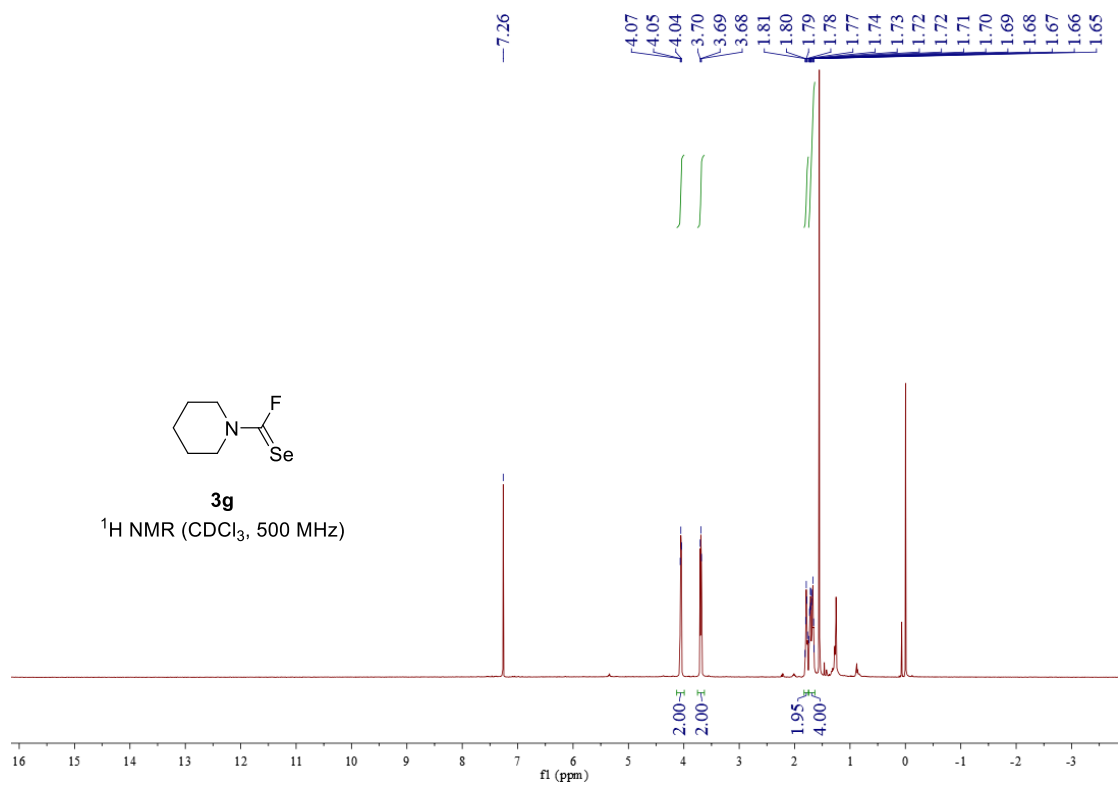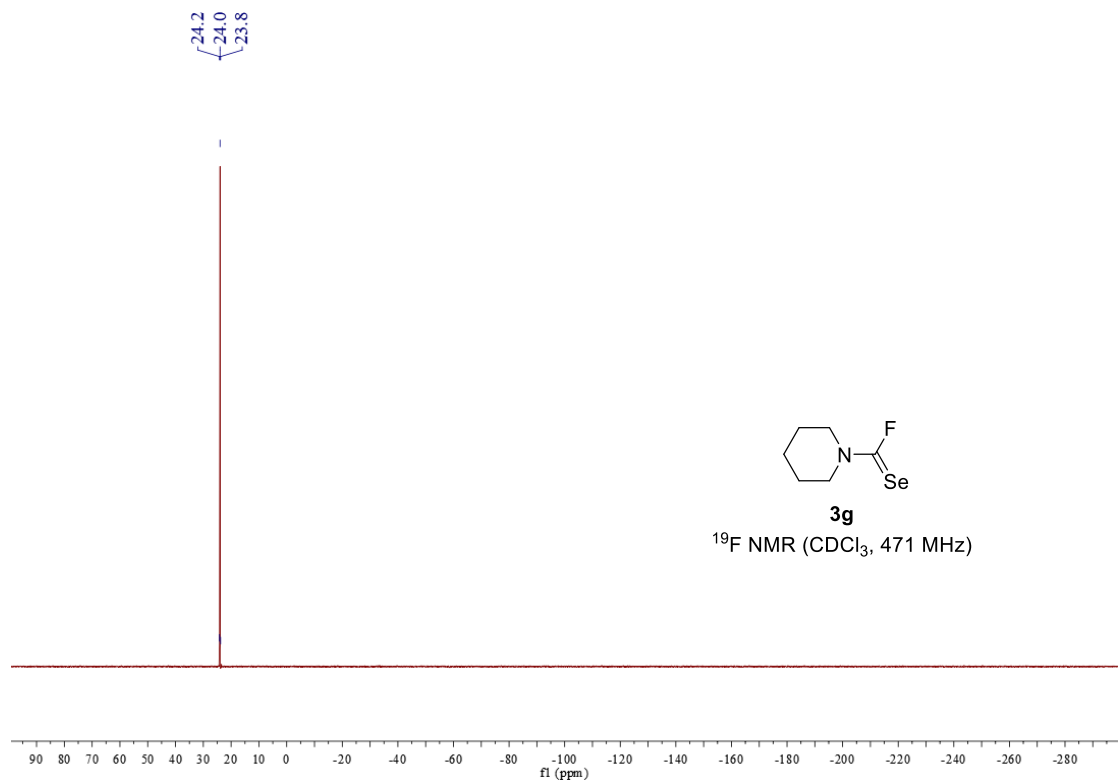

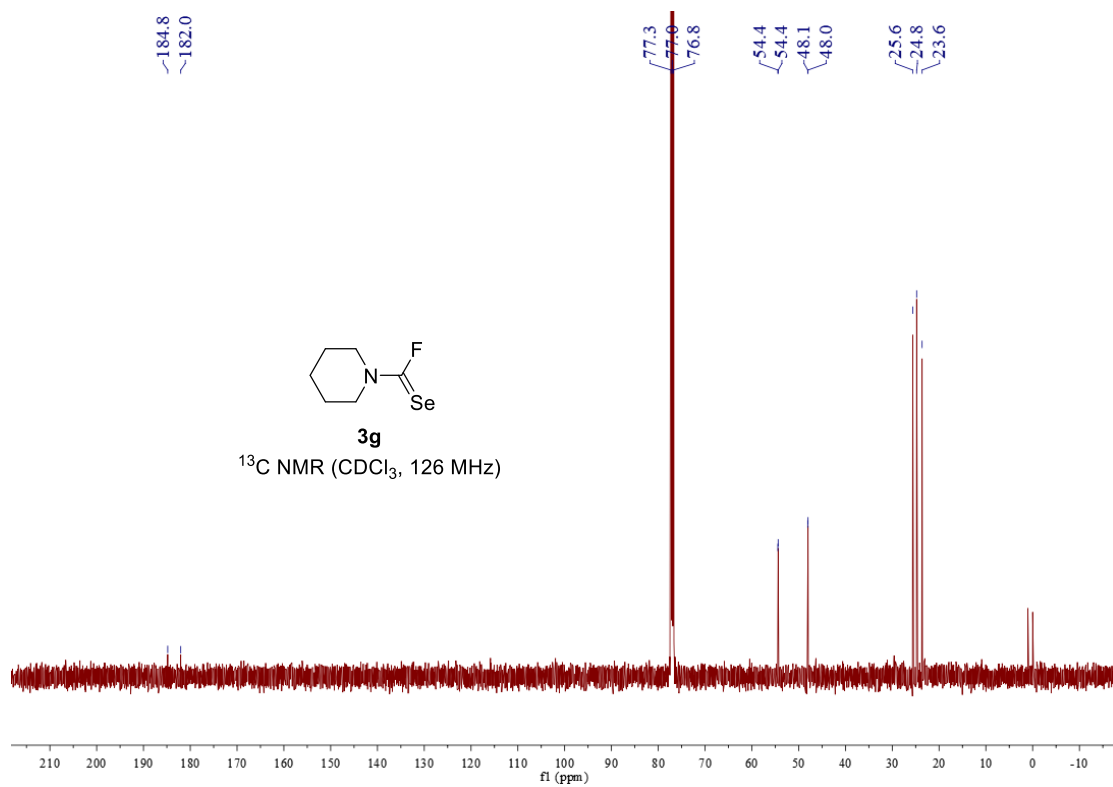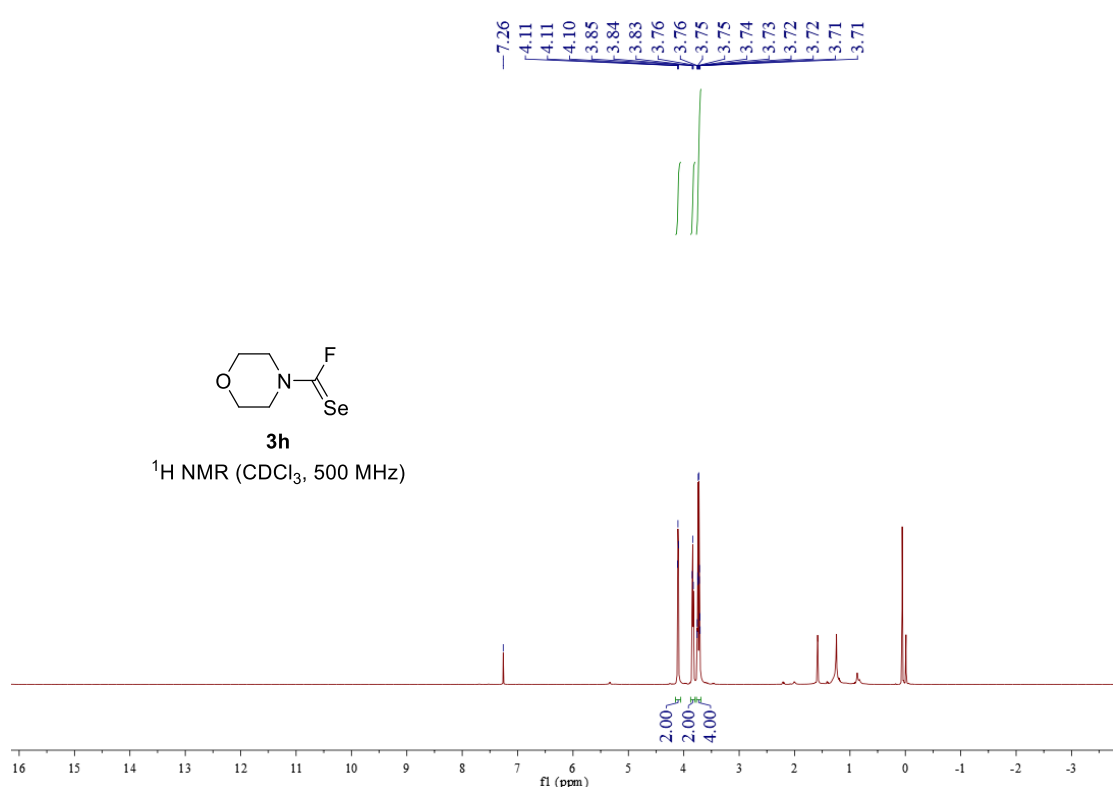

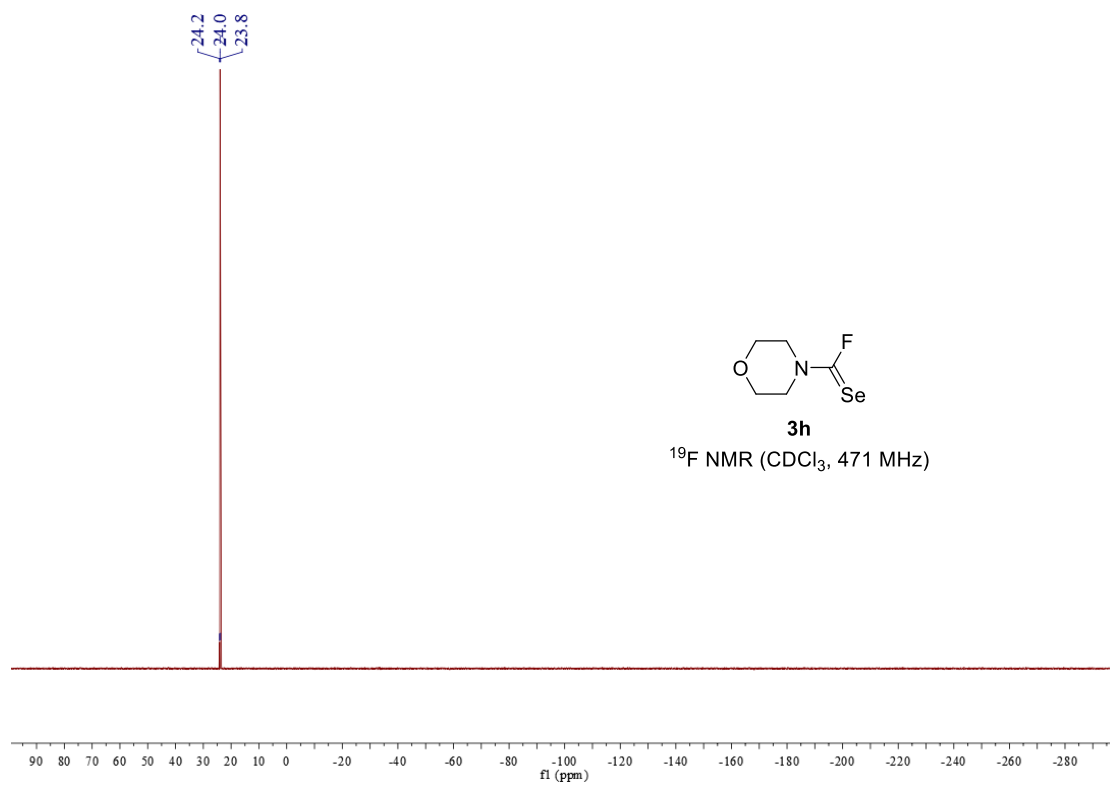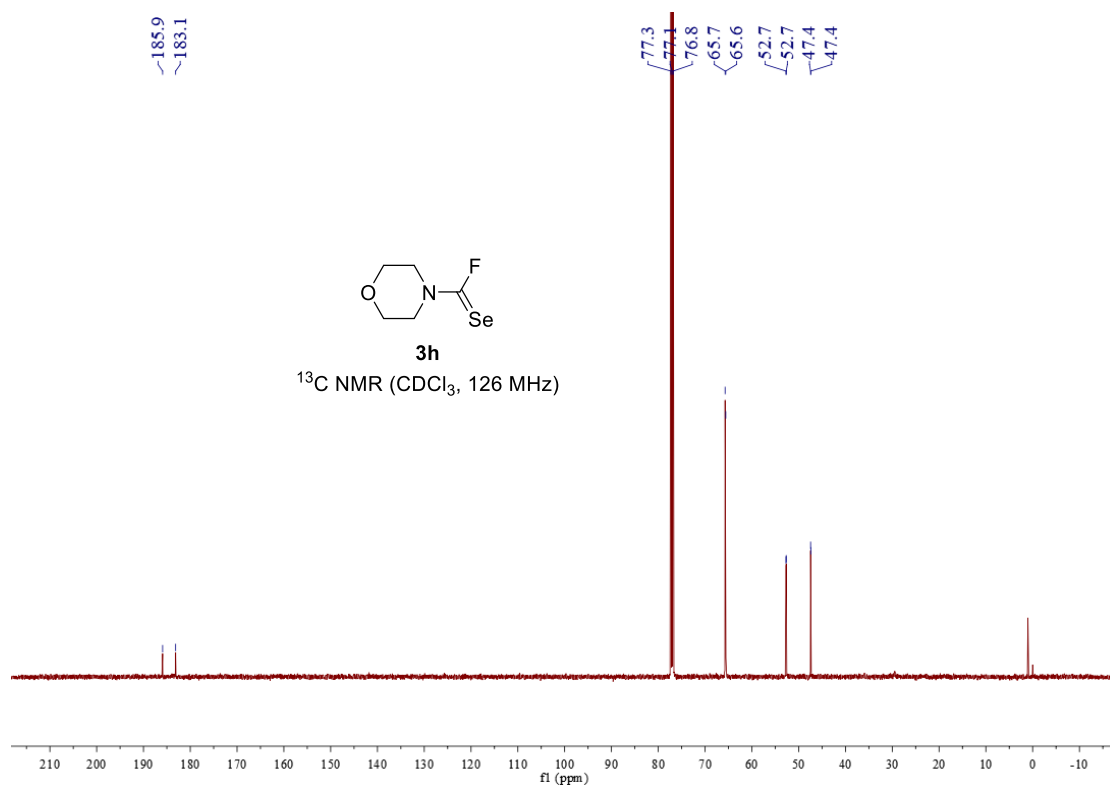

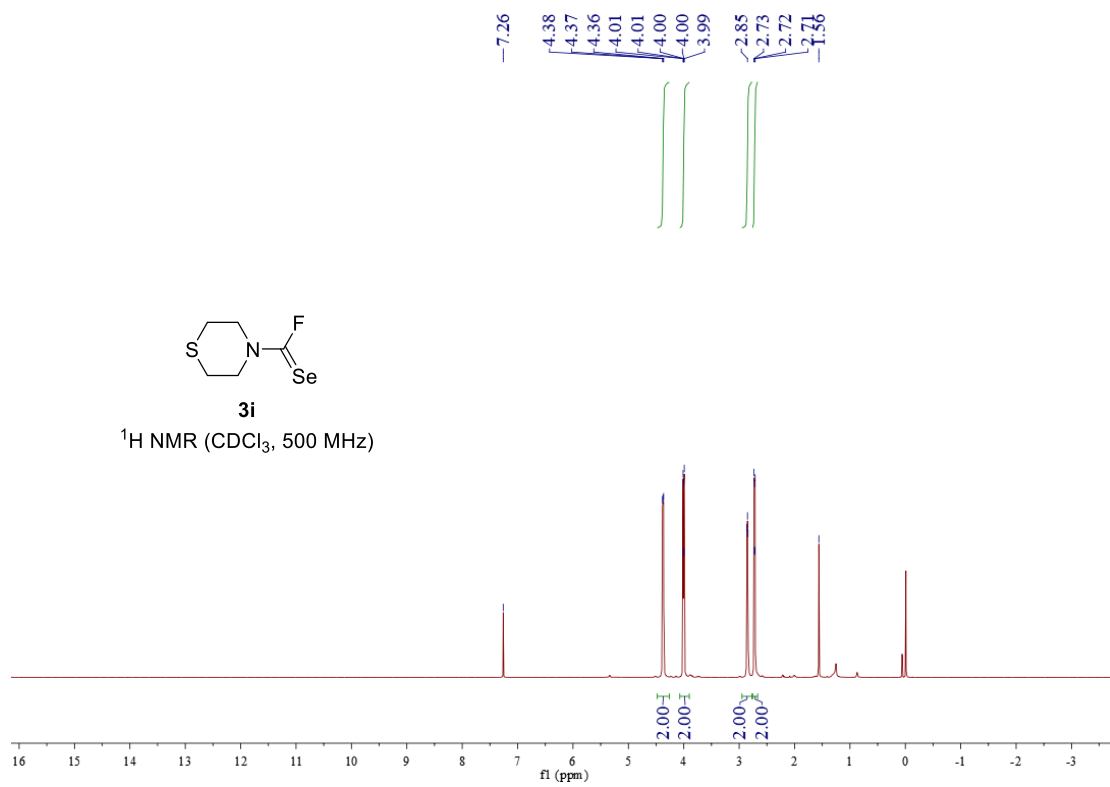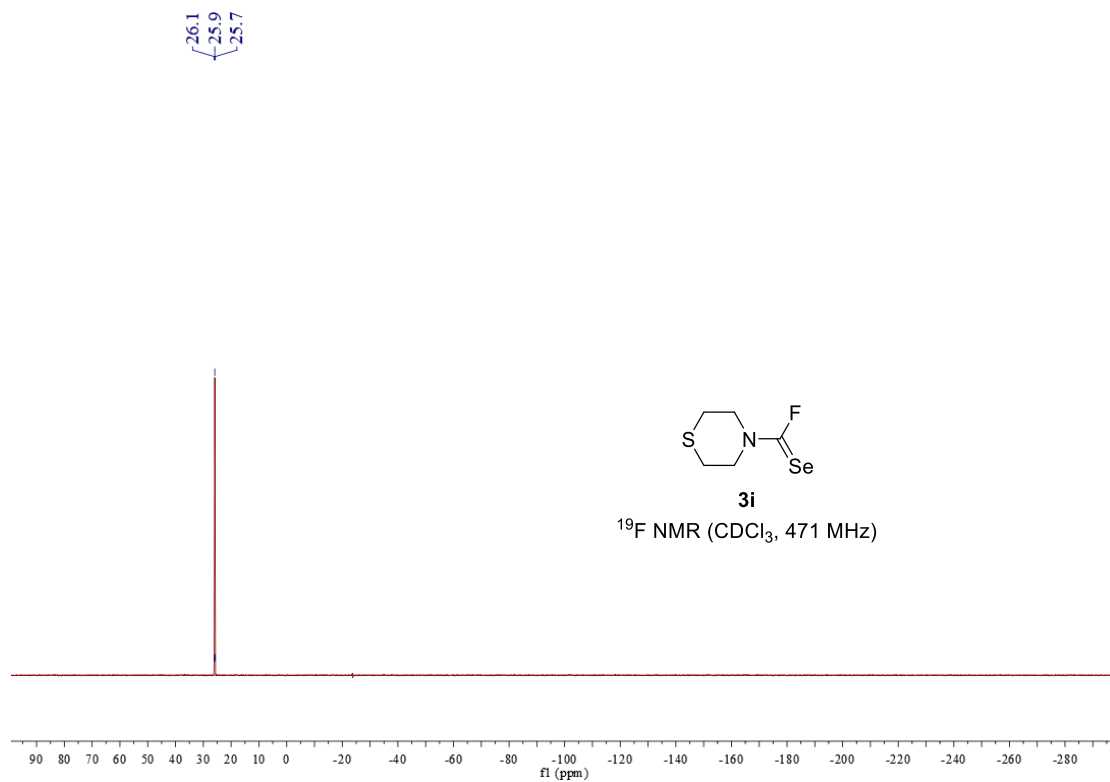

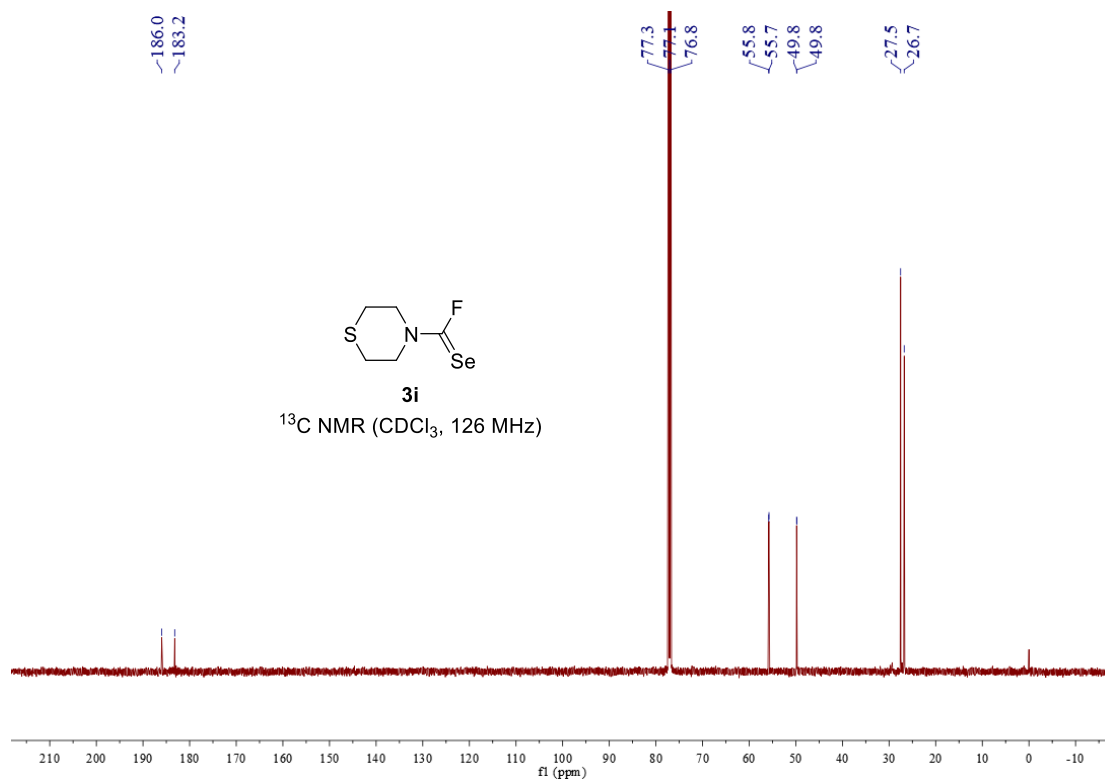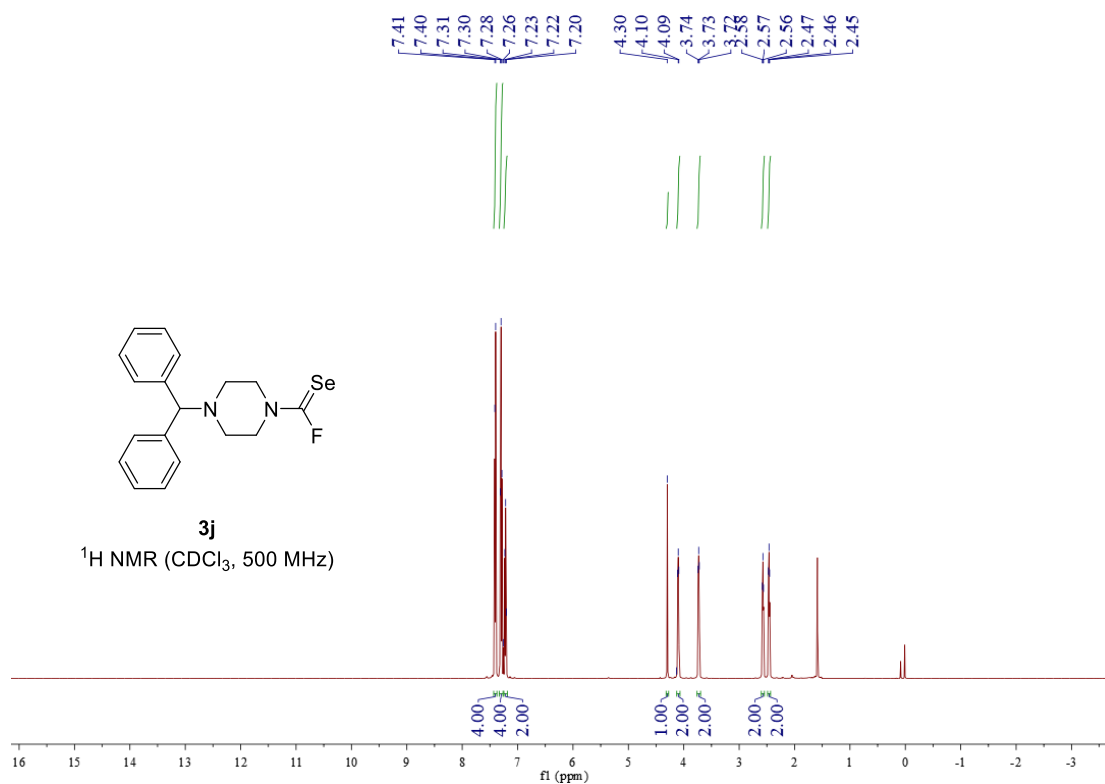

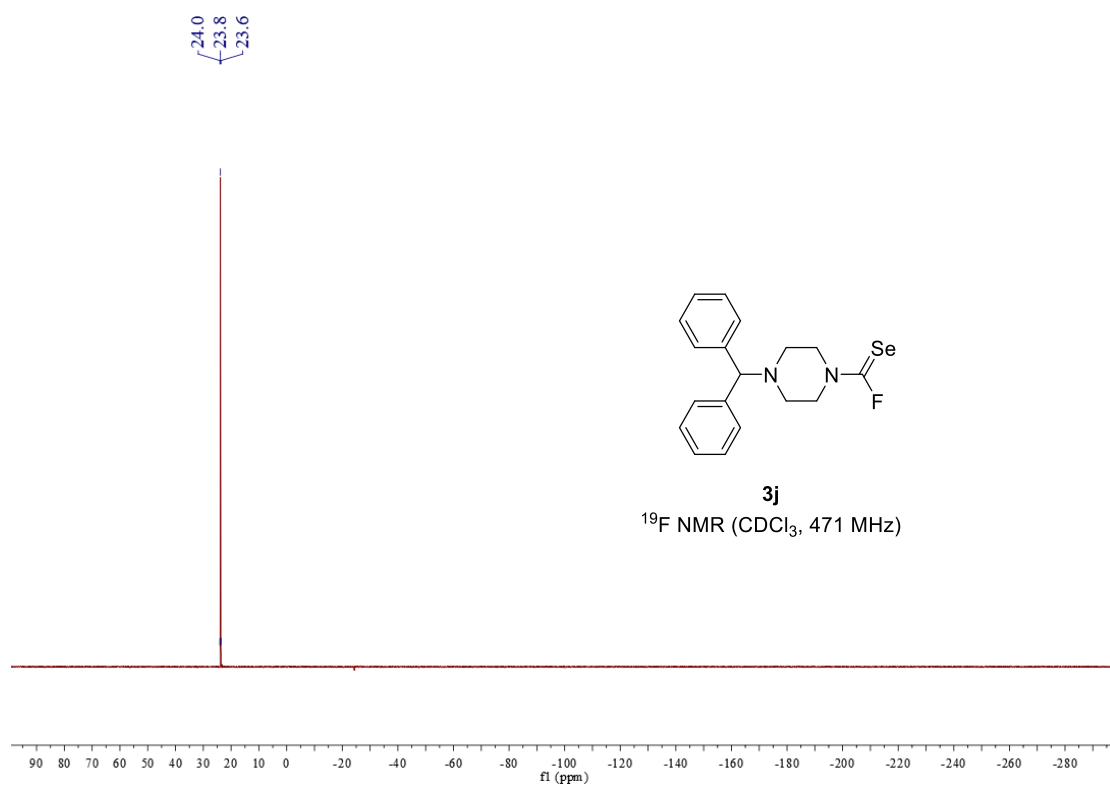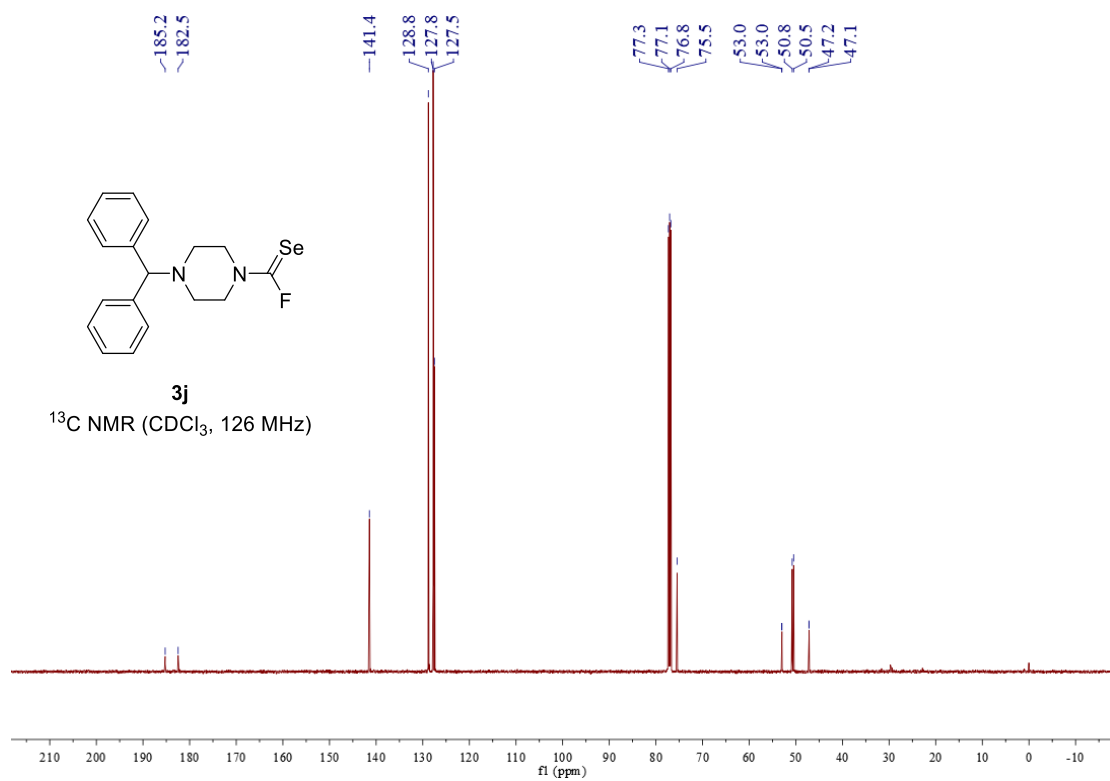



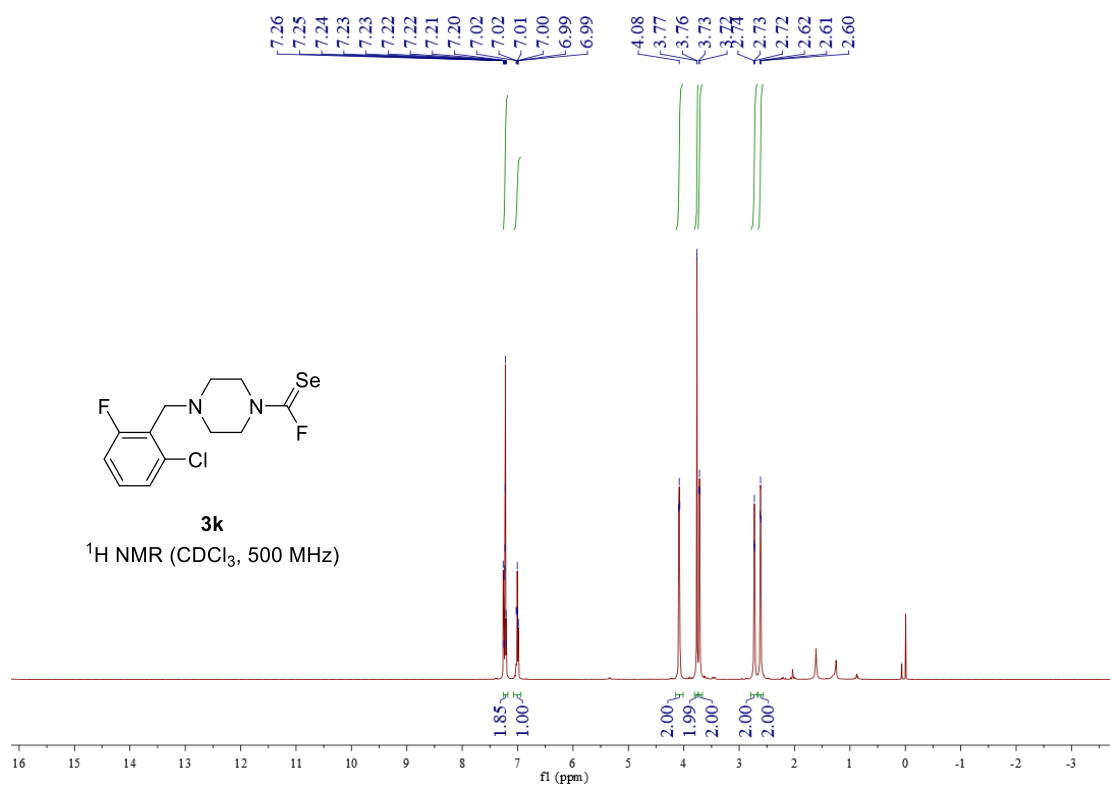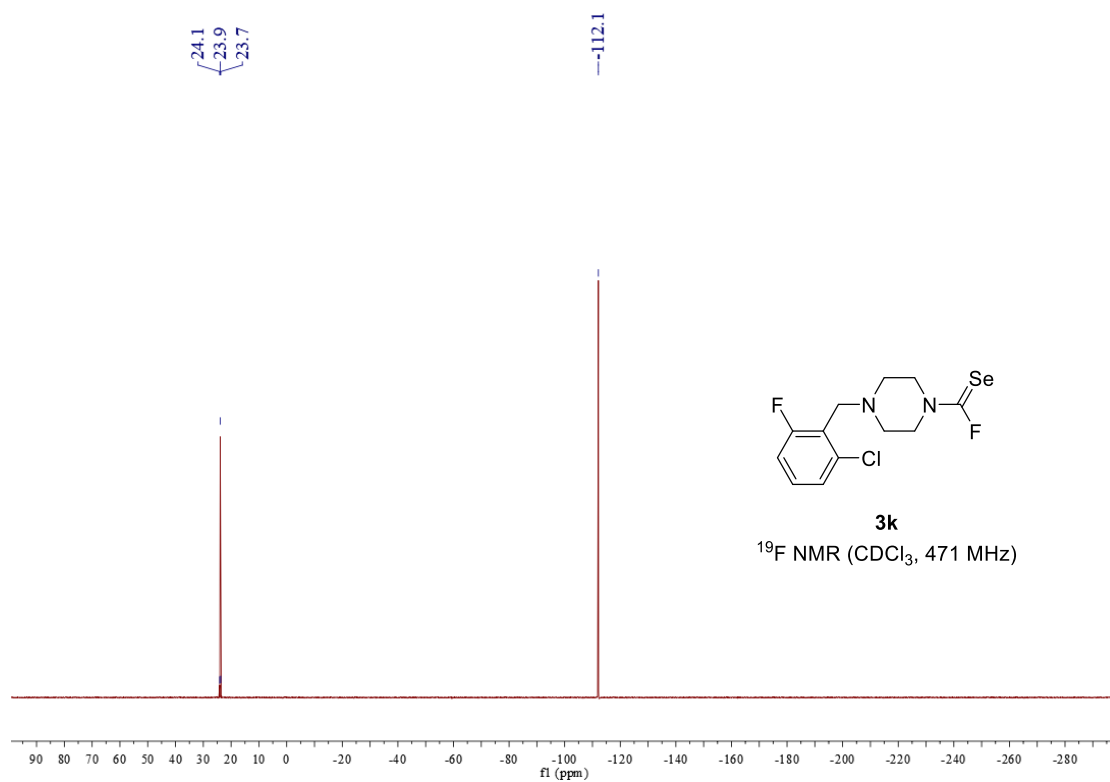

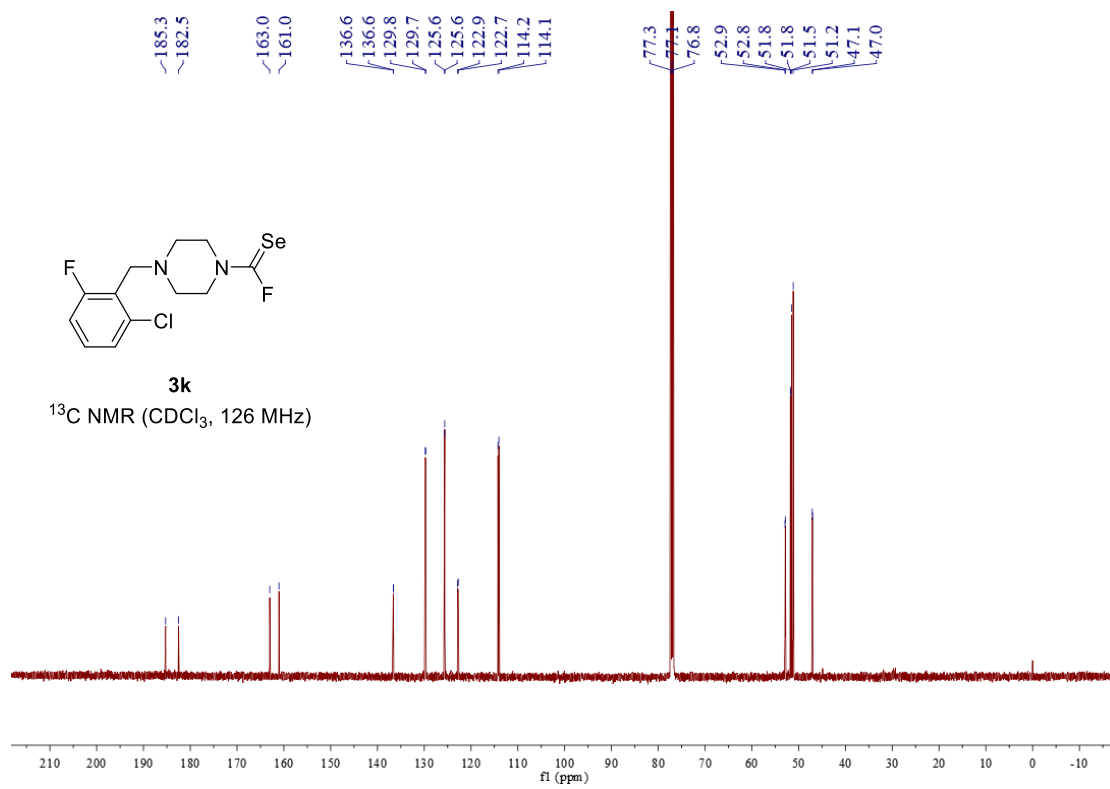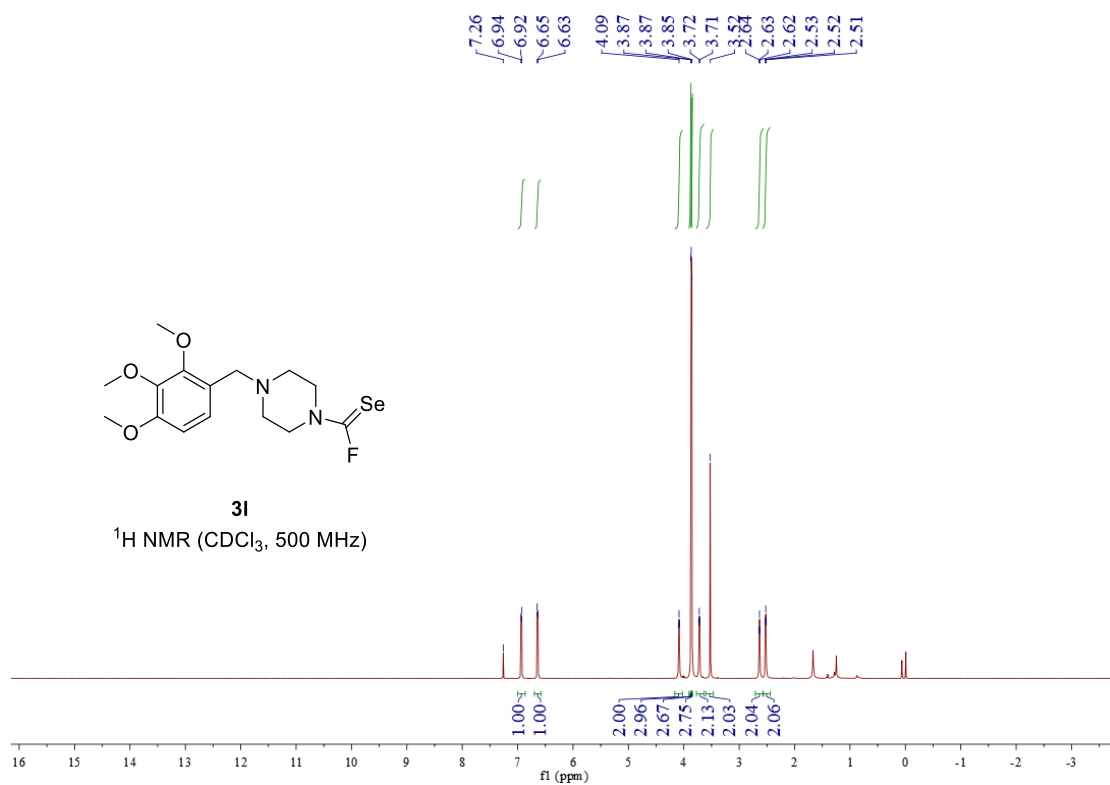

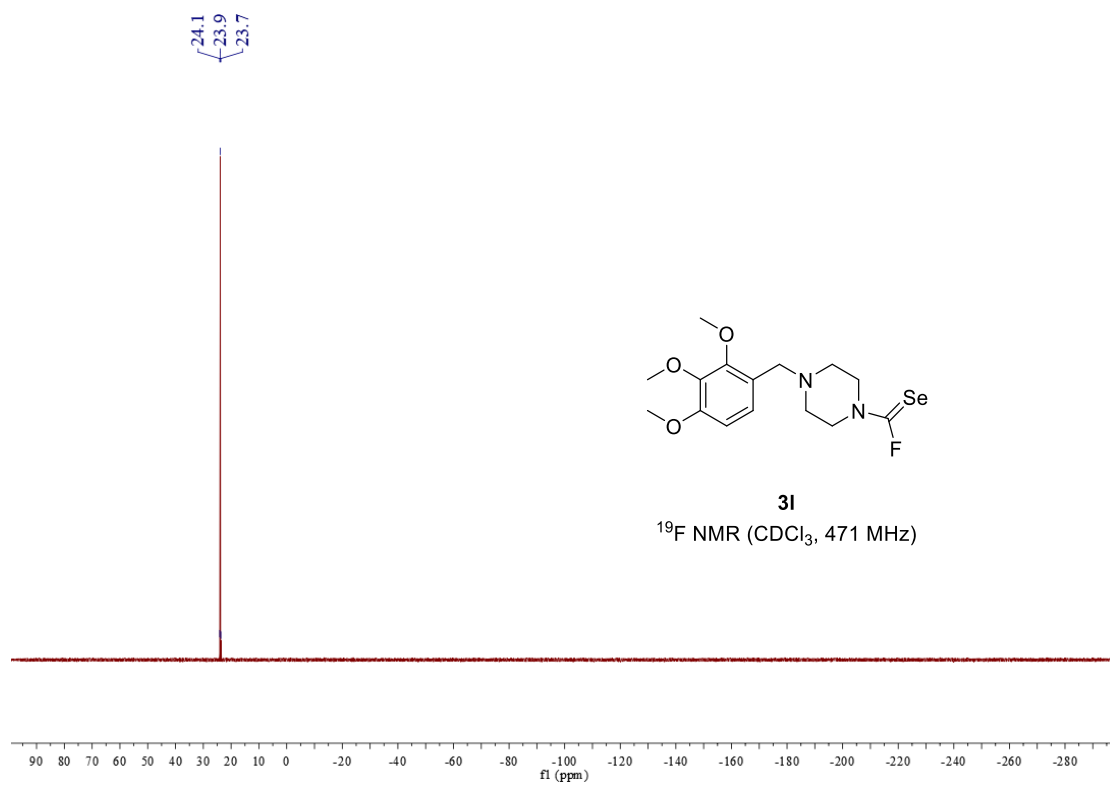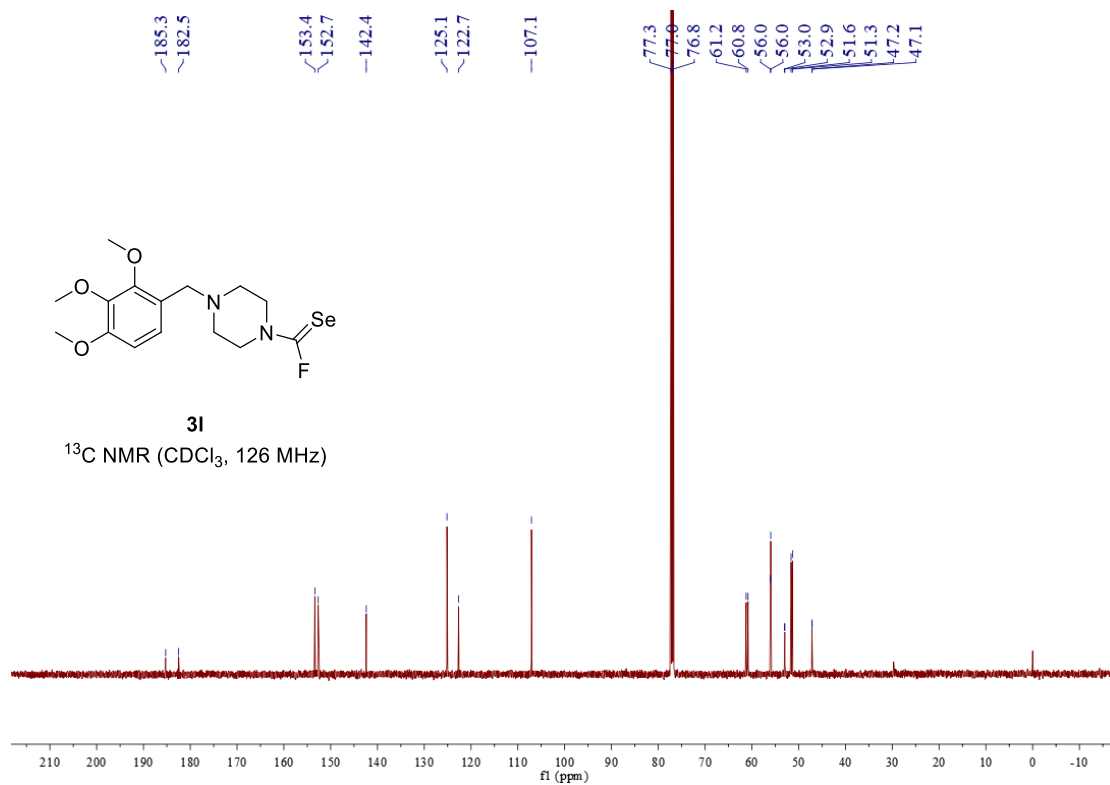

7.29  
7.27  
7.27  
7.26  
7.25  
7.25  
7.24  
7.23  
7.22  
7.21  
7.21  
7.20  
7.19  
7.13  
7.12  
7.11  
5.07  
4.81  
4.18  
4.17  
3.92  
3.07  
3.07  
3.06  
3.04  
2.98  
2.96  
2.95

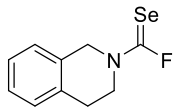

**3m**

<sup>1</sup>H NMR (CDCl<sub>3</sub>, 500 MHz)

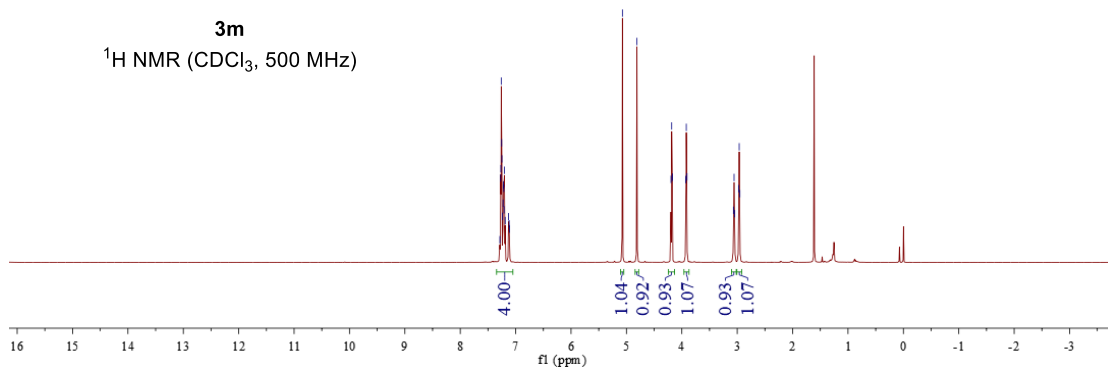

27.8  
27.6  
27.4  
25.5  
25.3  
25.1

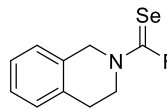

**3m**

<sup>19</sup>F NMR (CDCl<sub>3</sub>, 471 MHz)

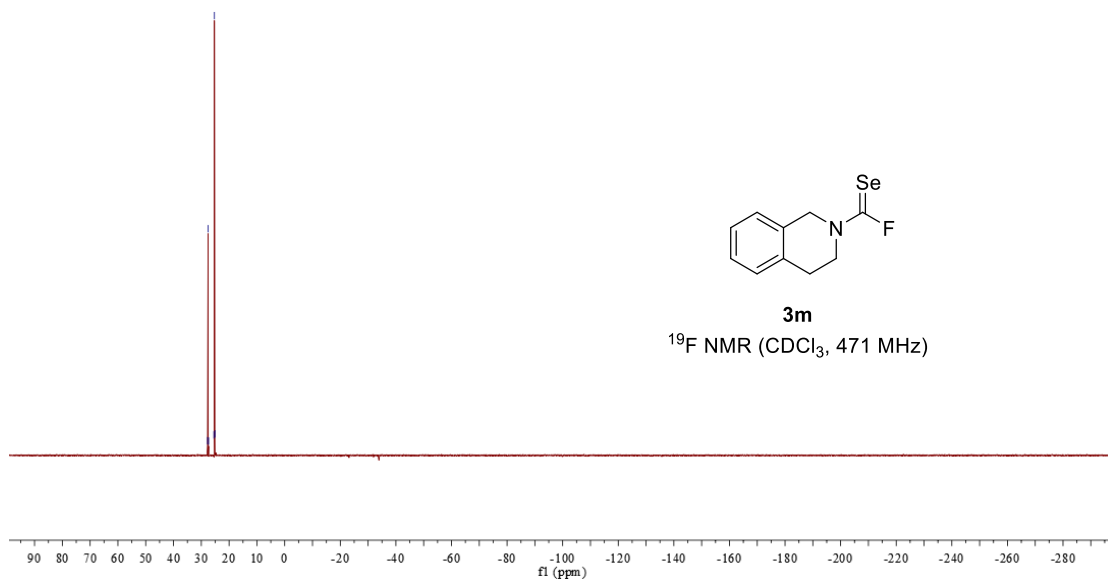

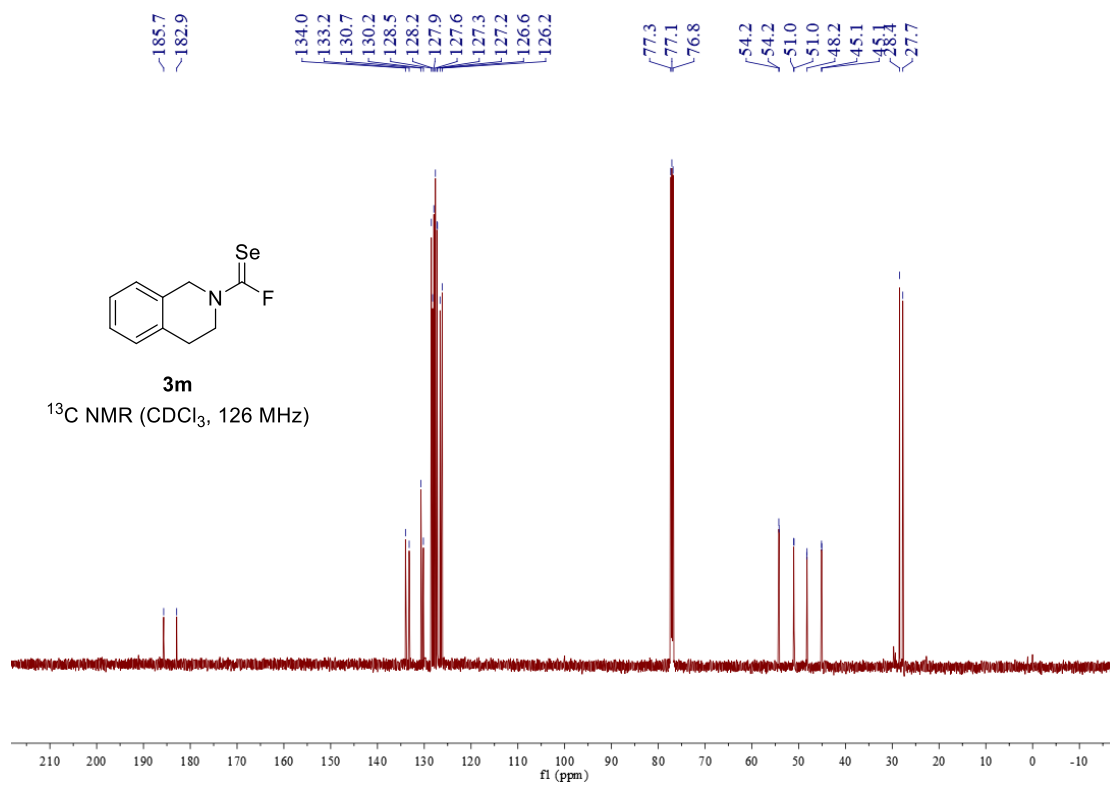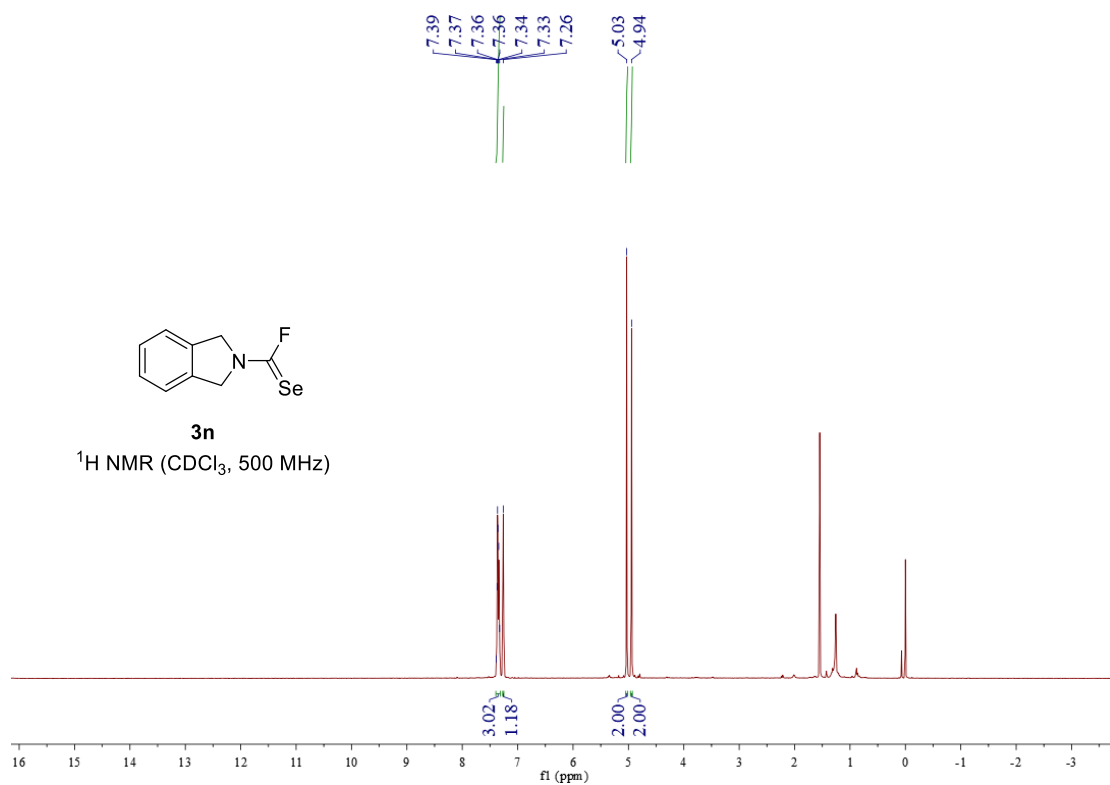

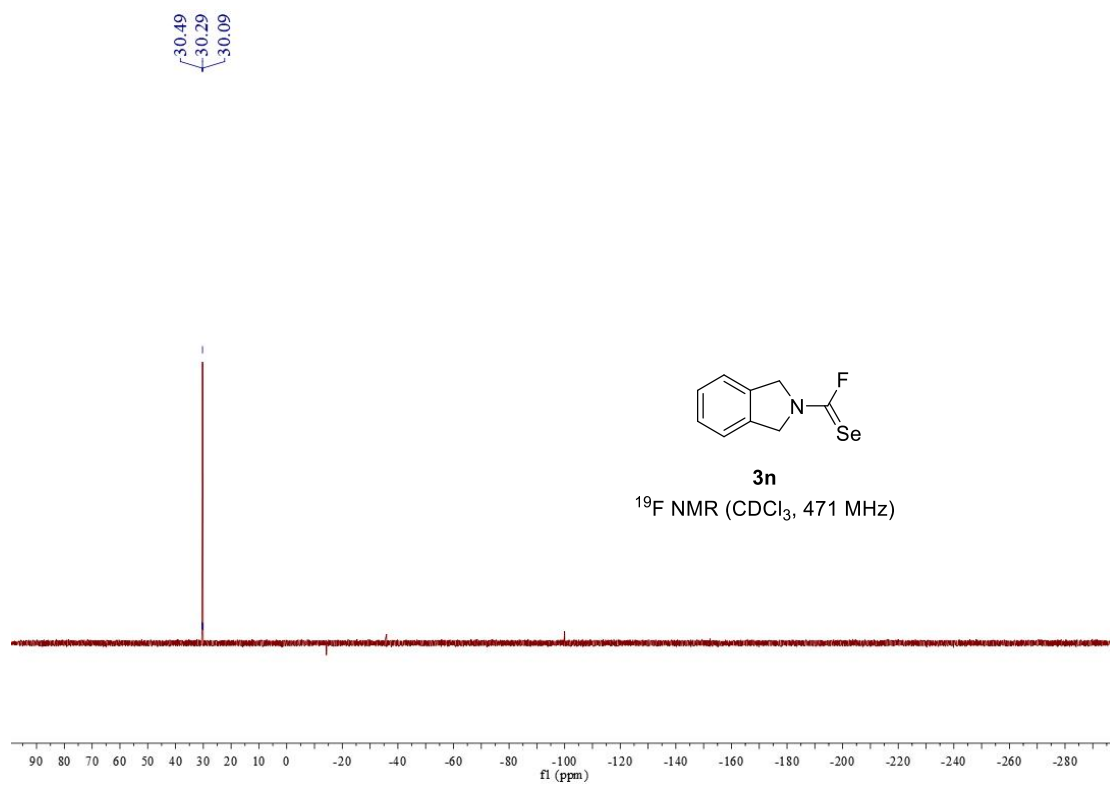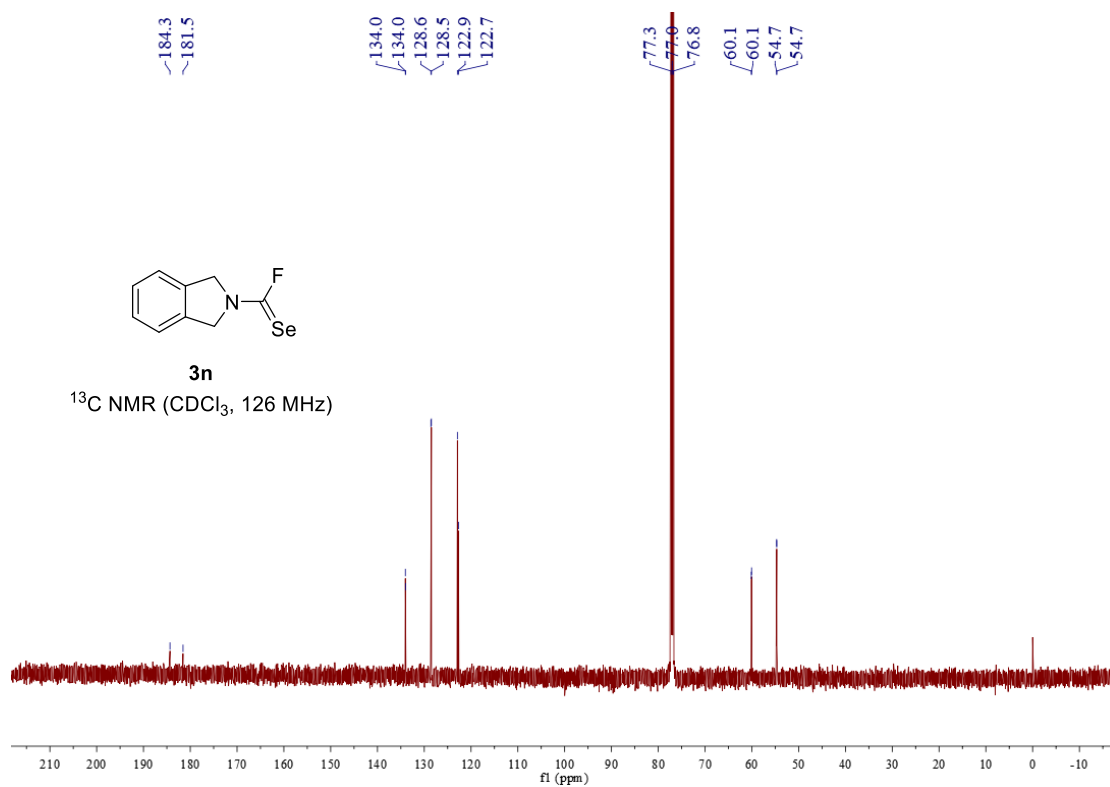

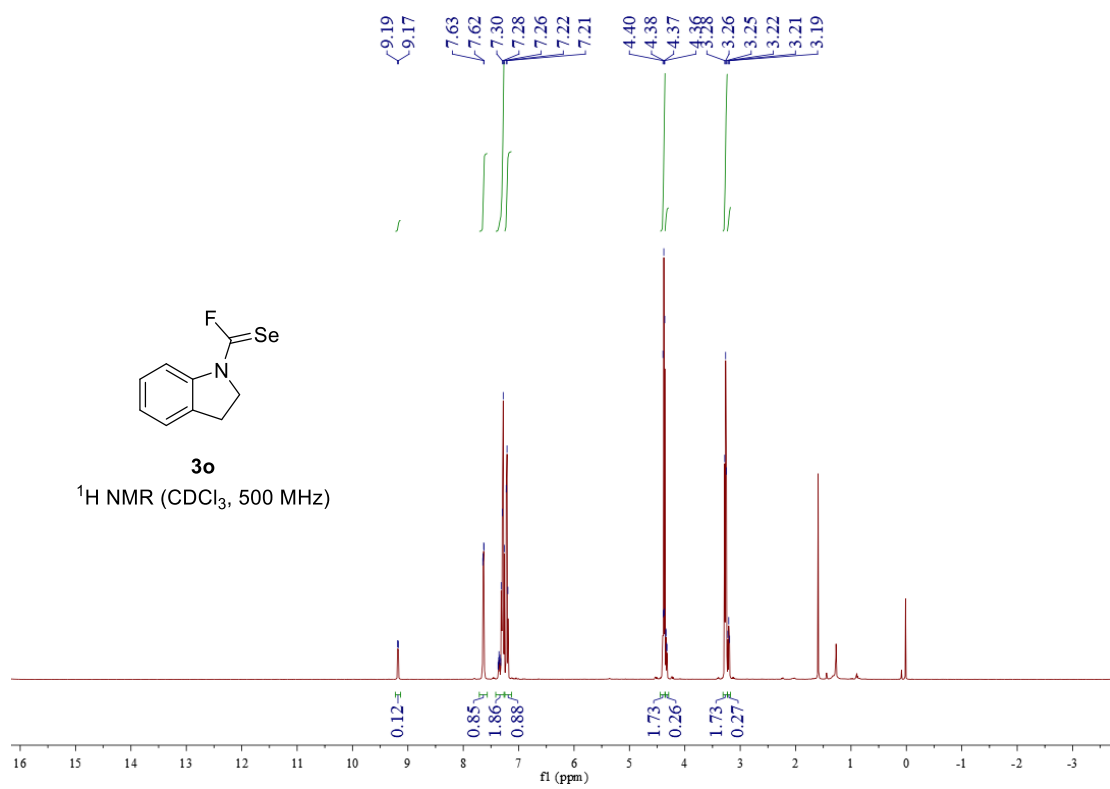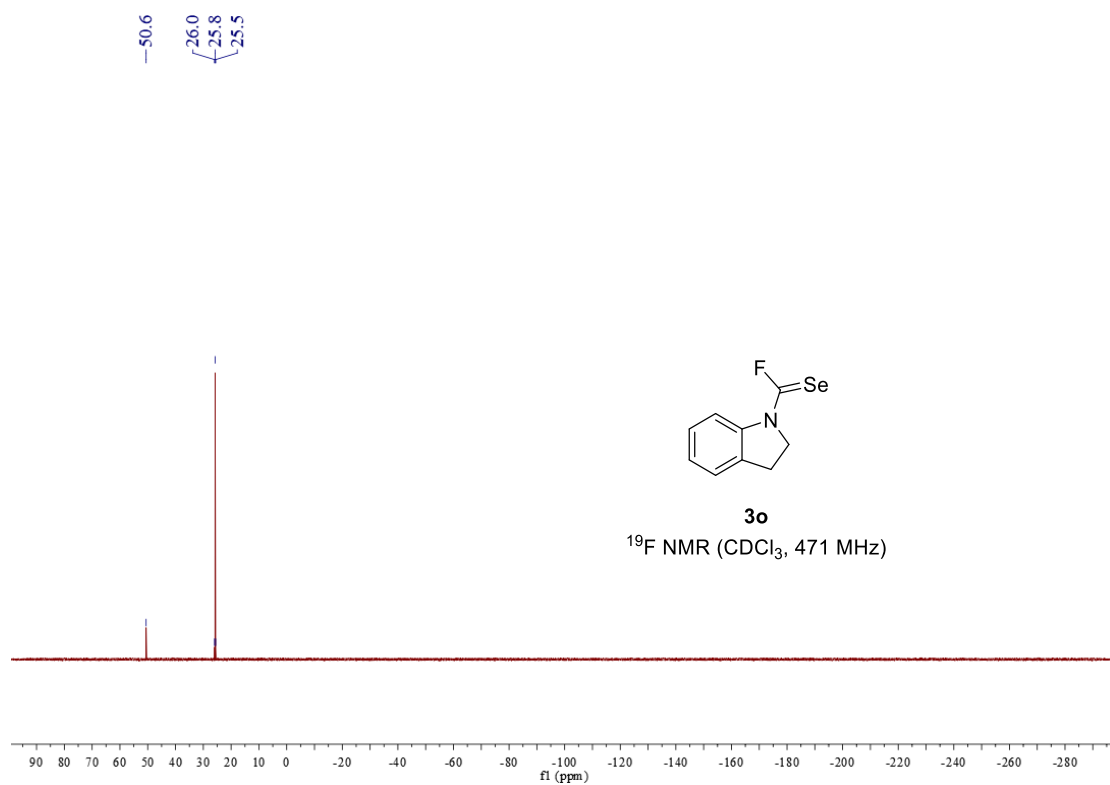

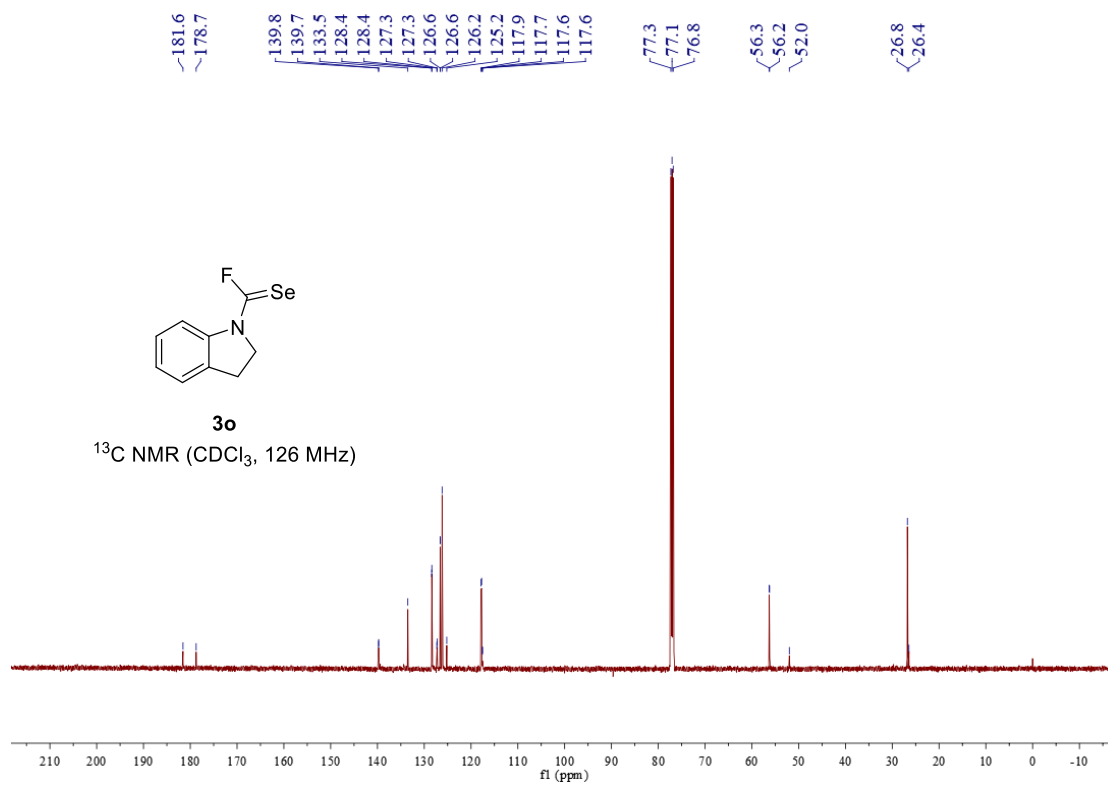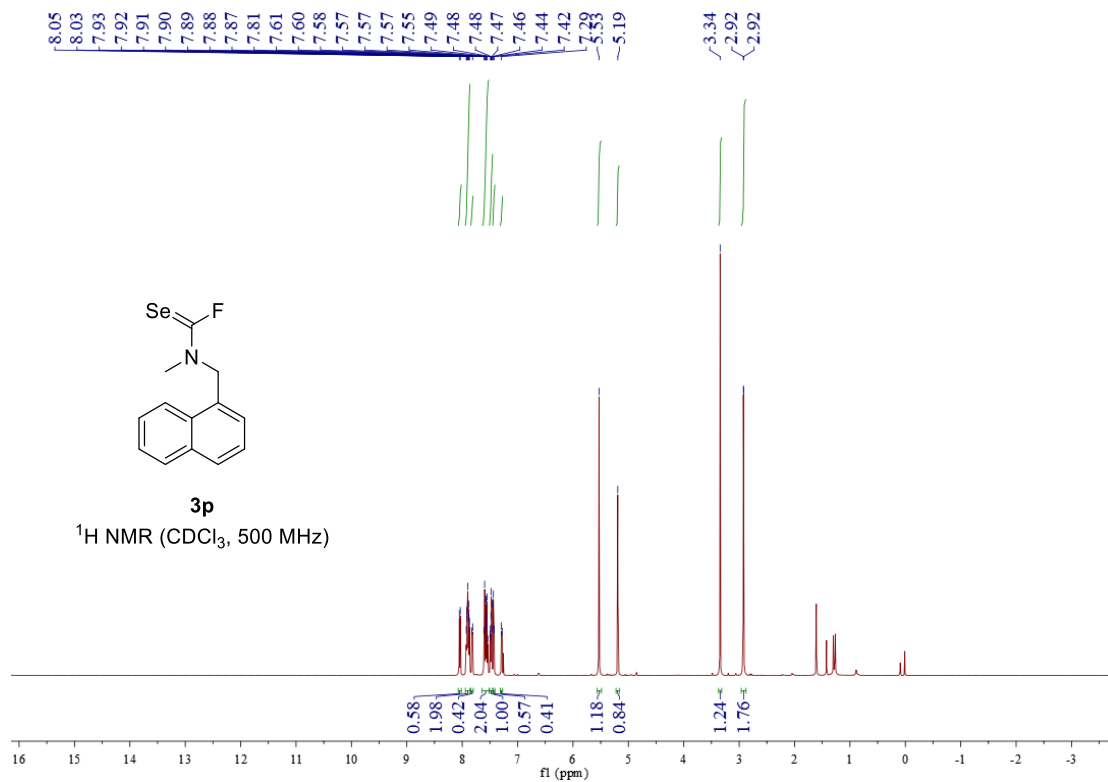



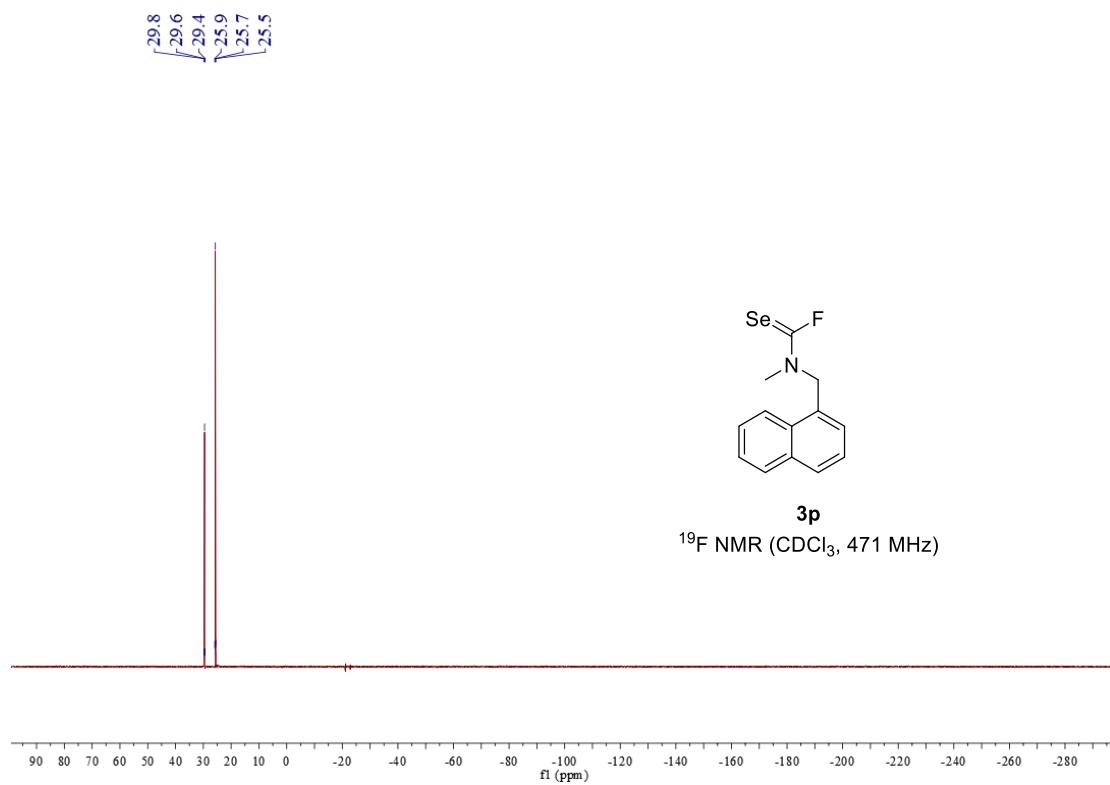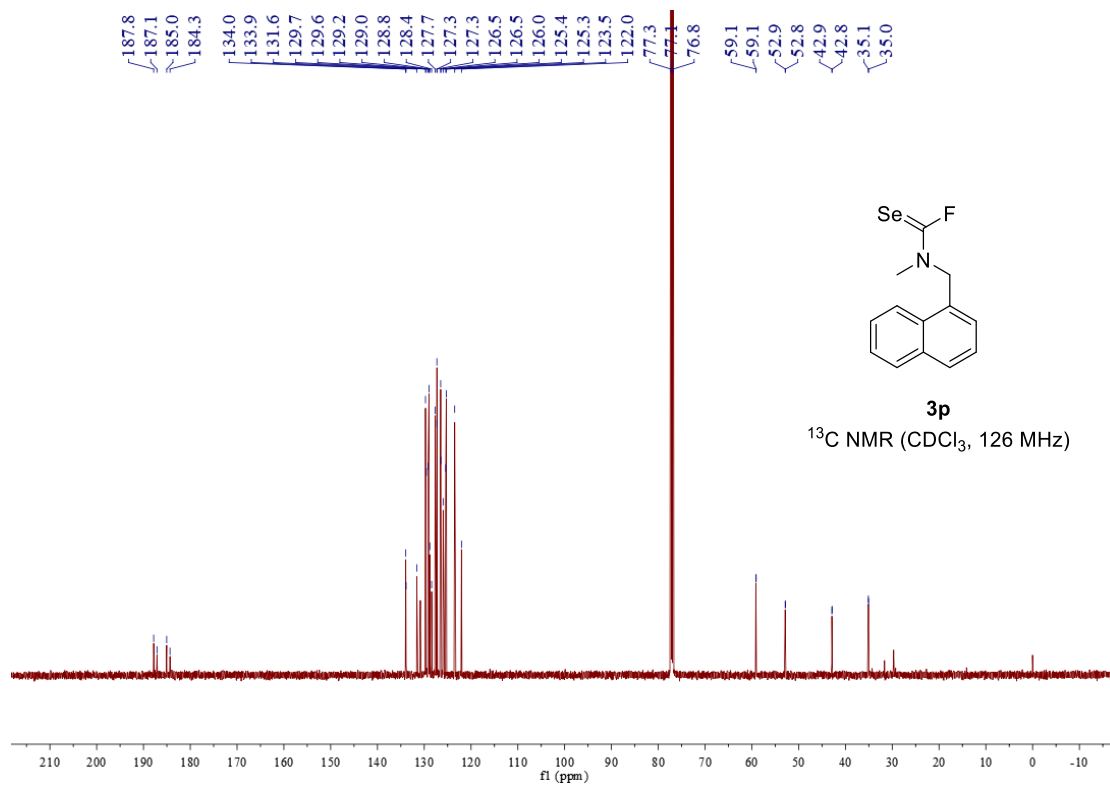

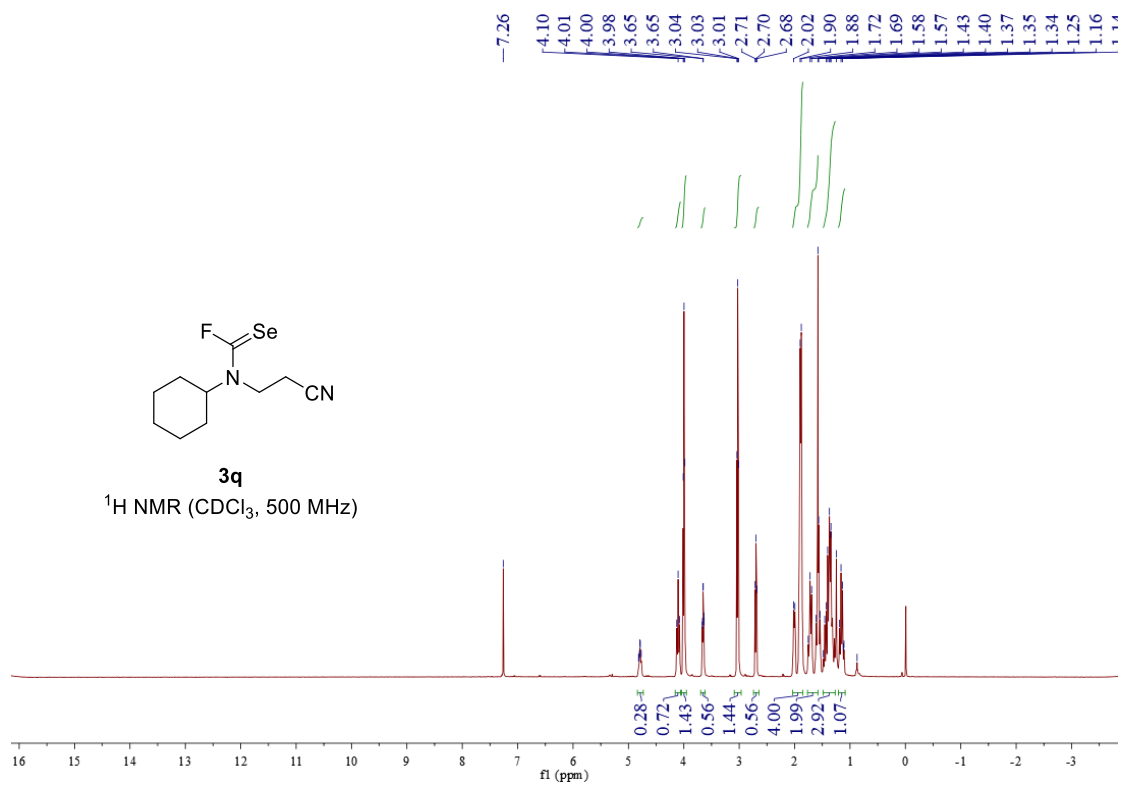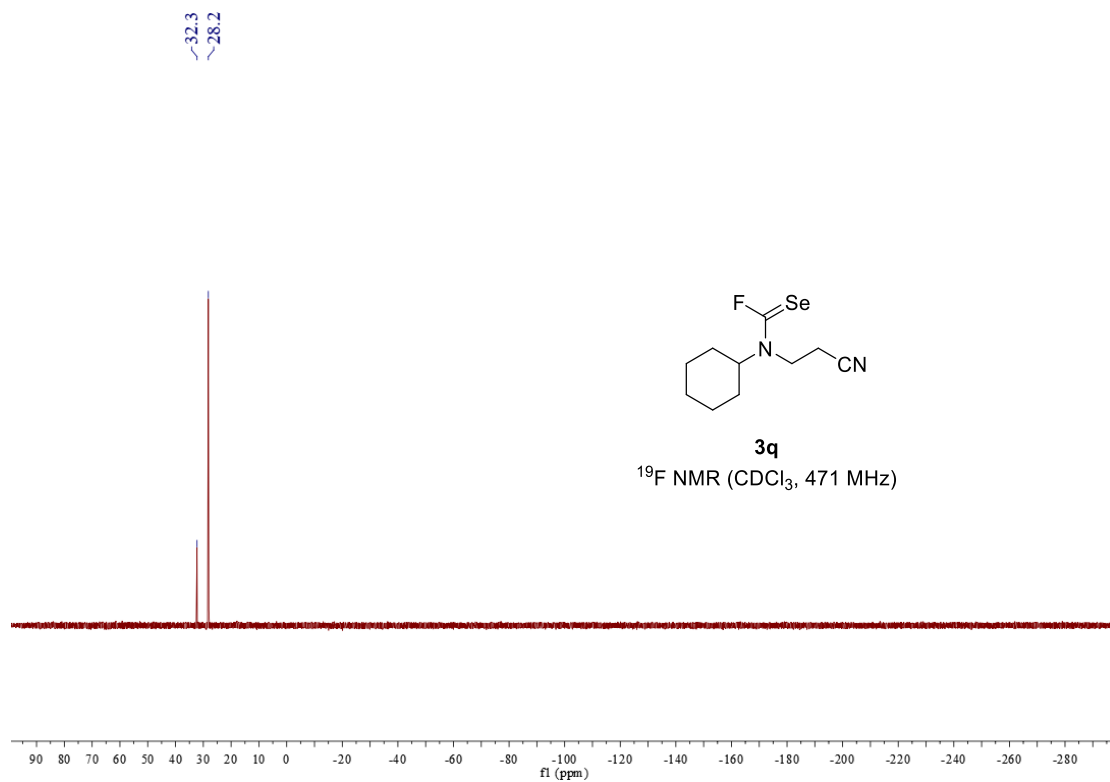

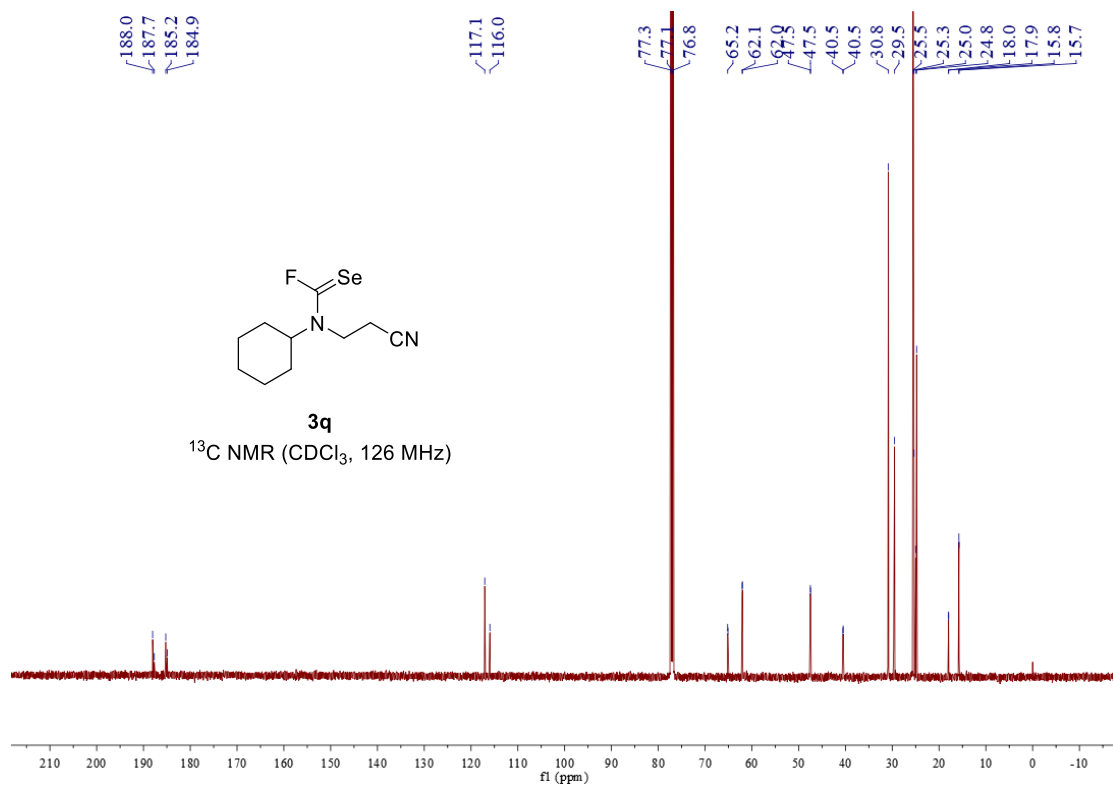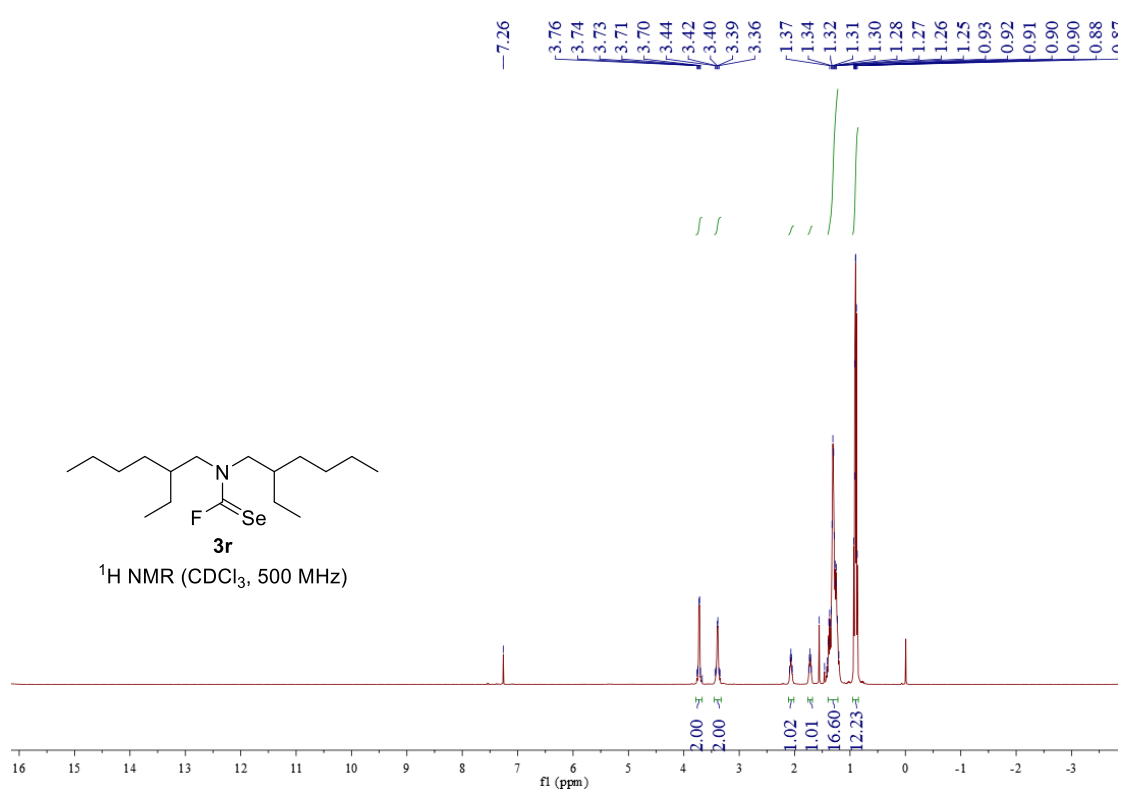

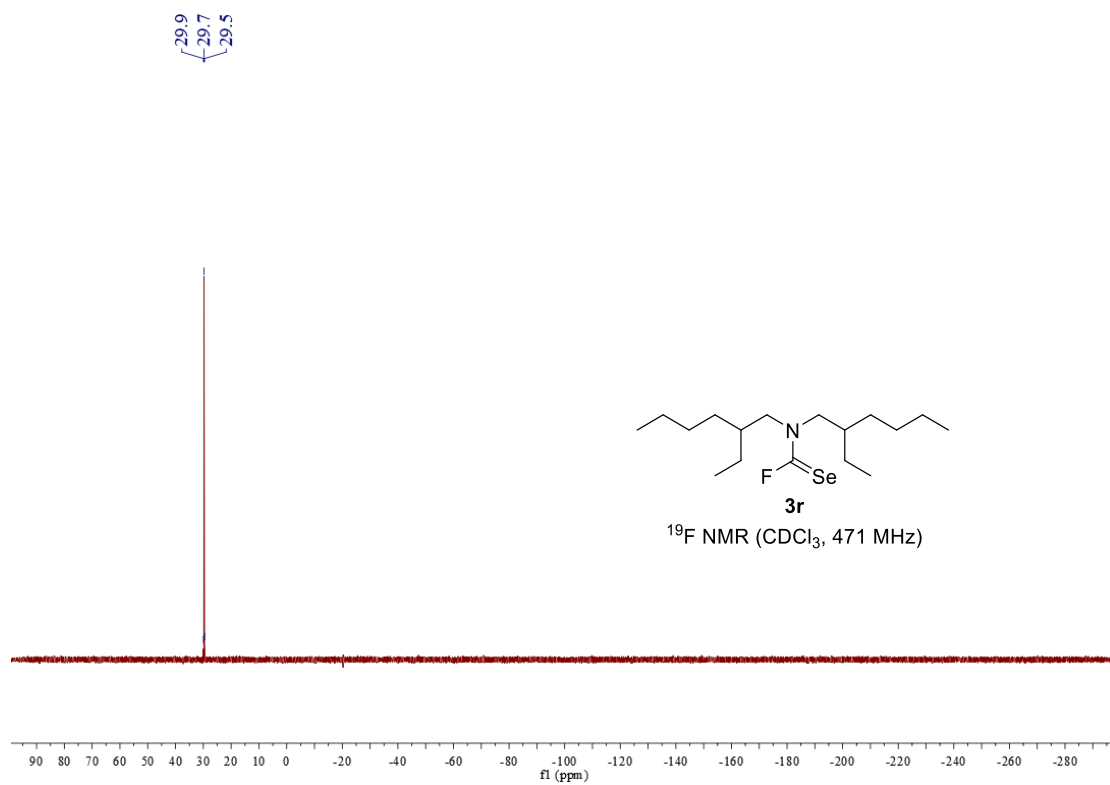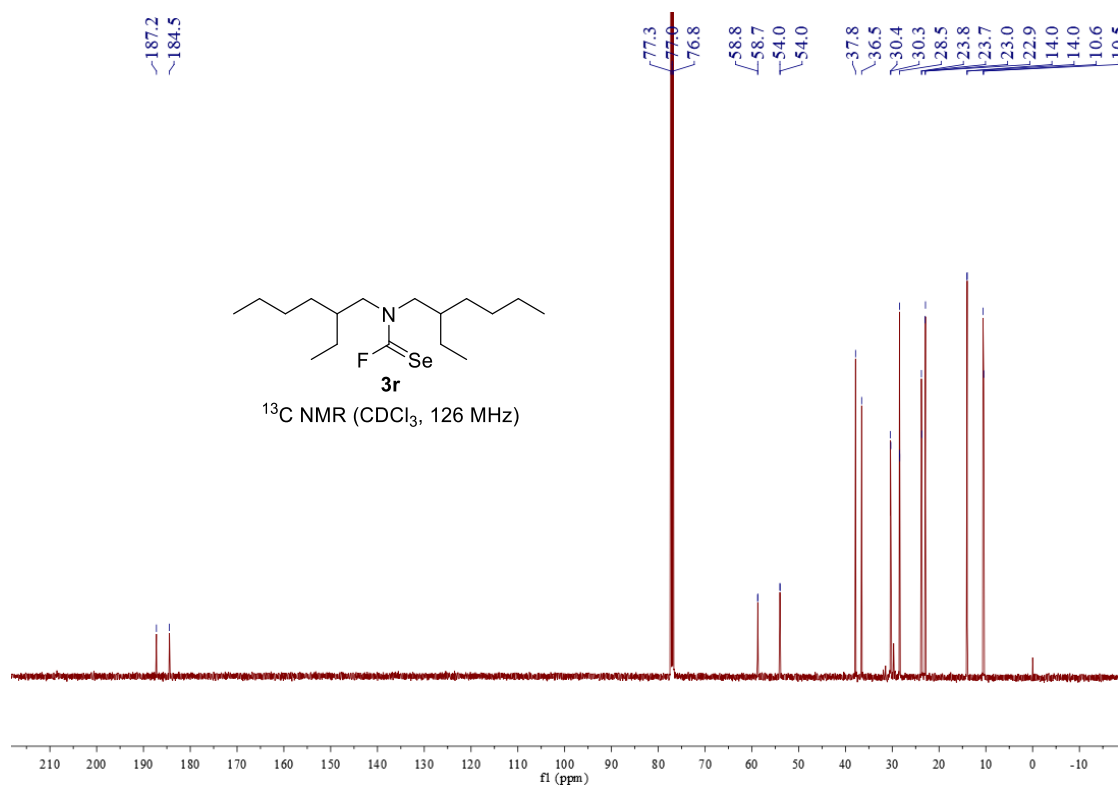

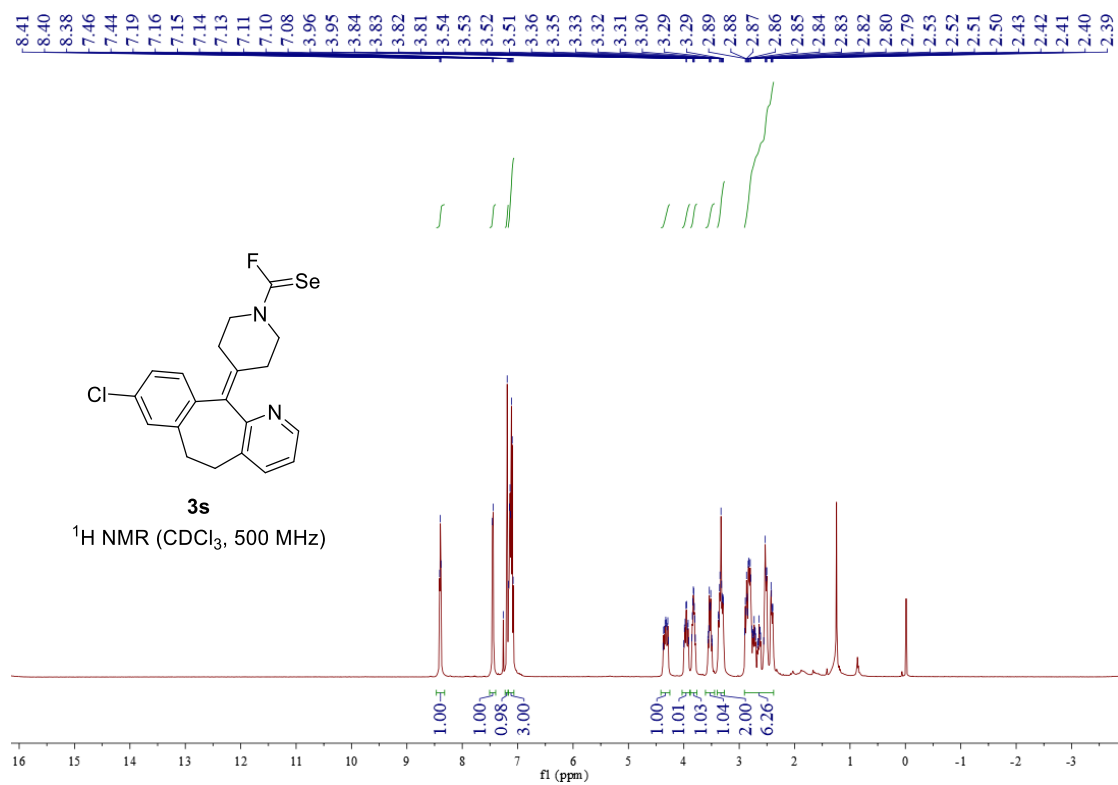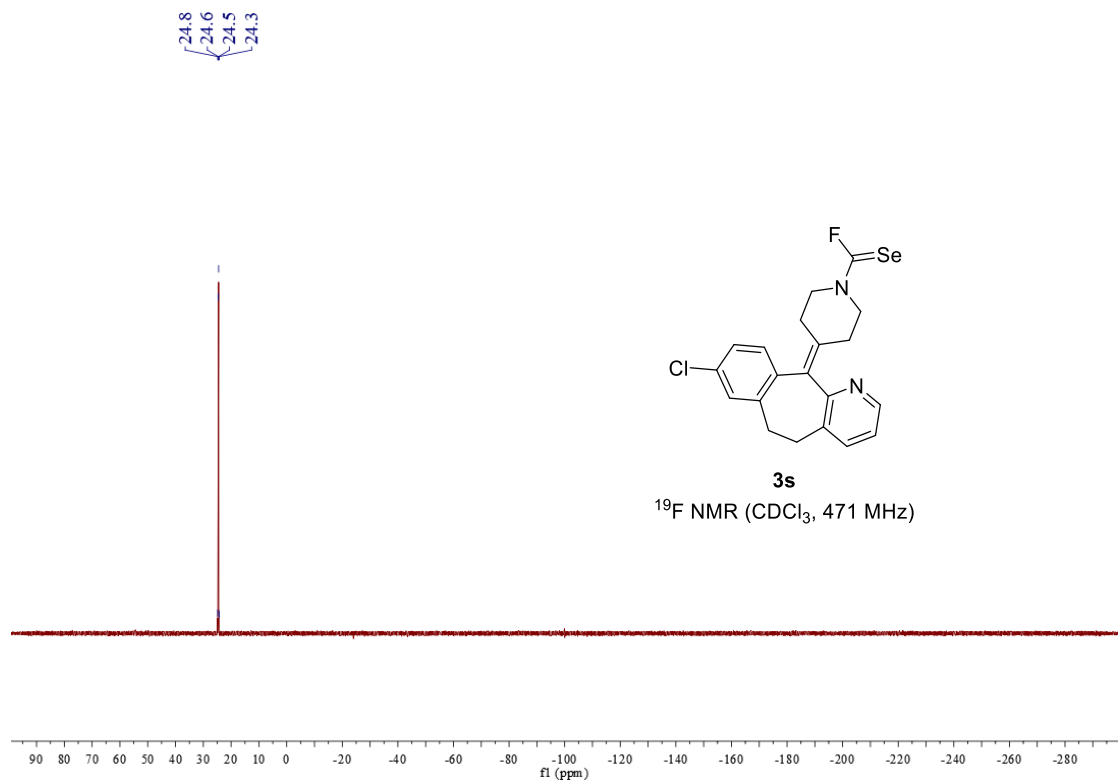

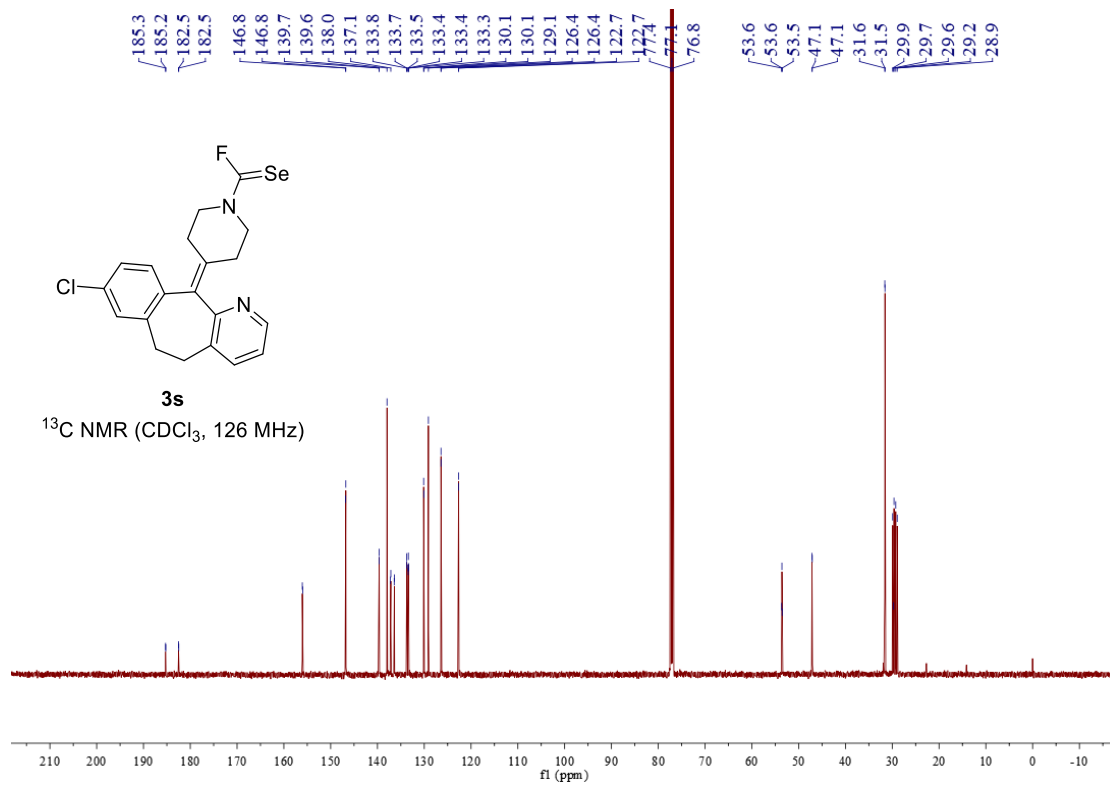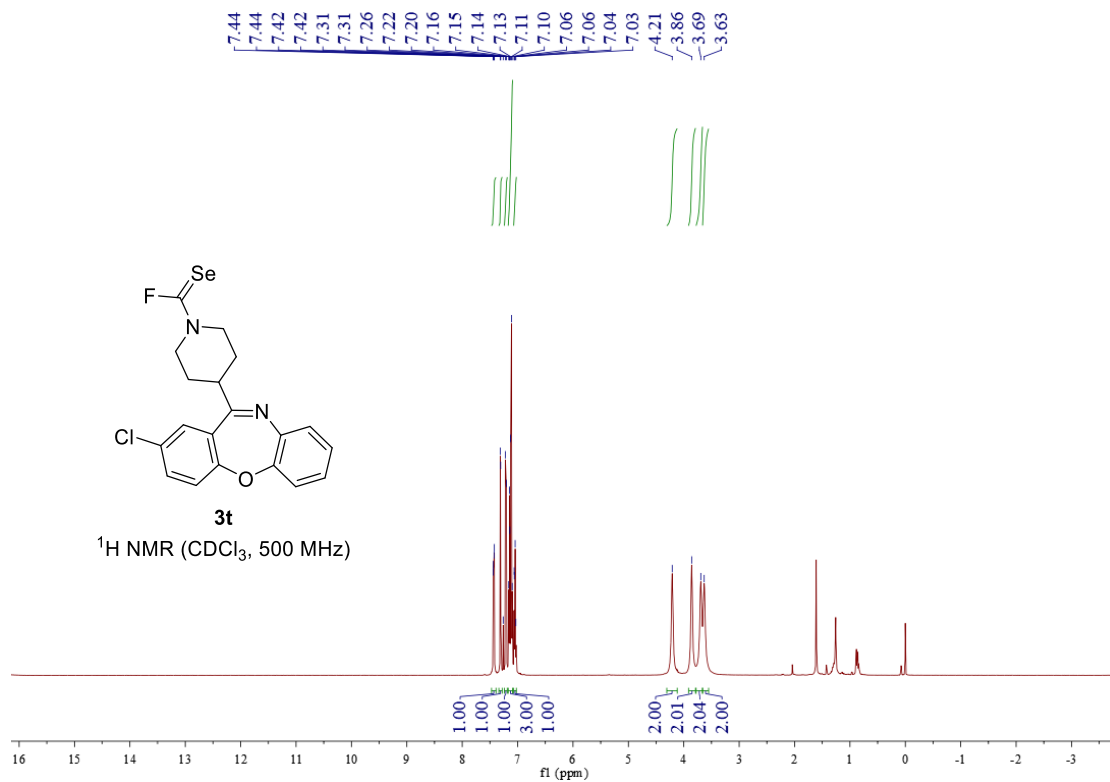

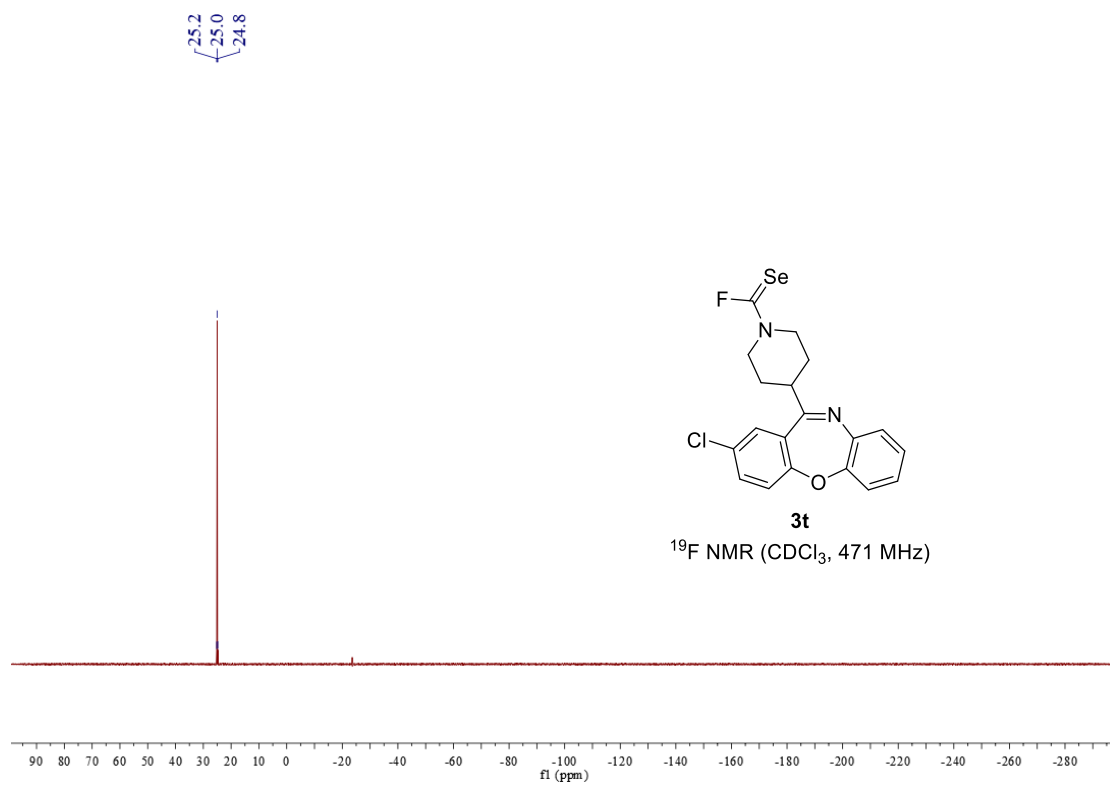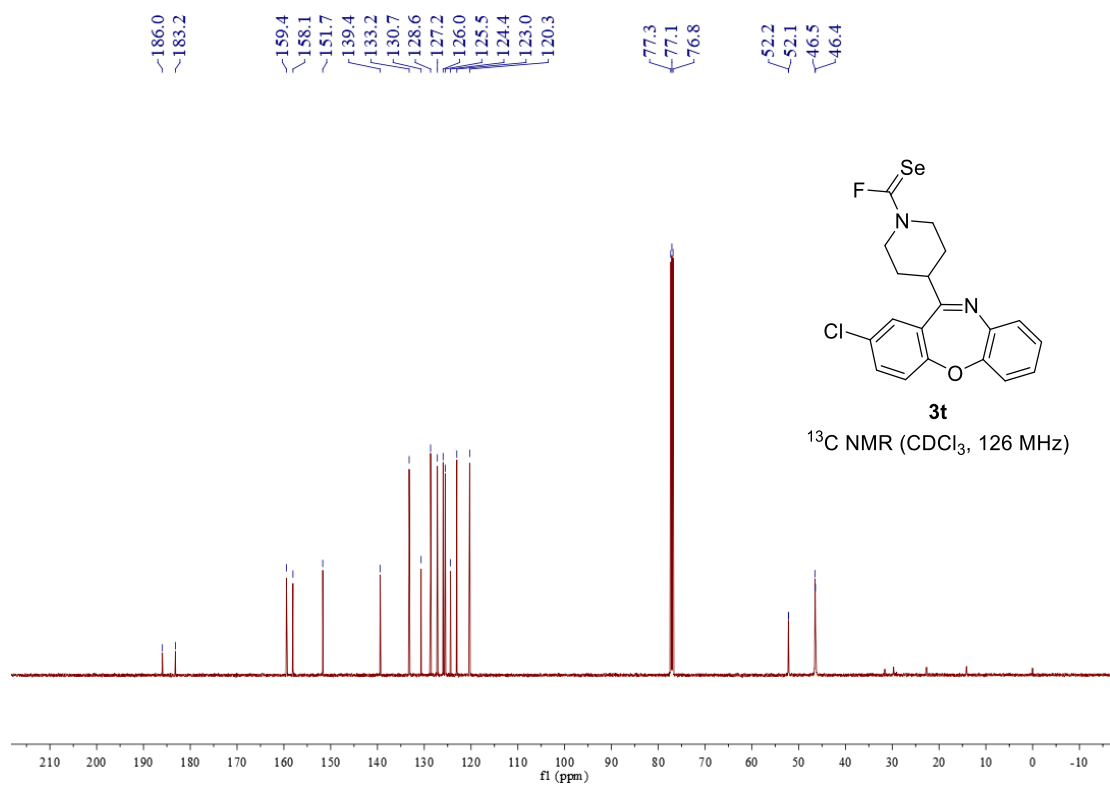

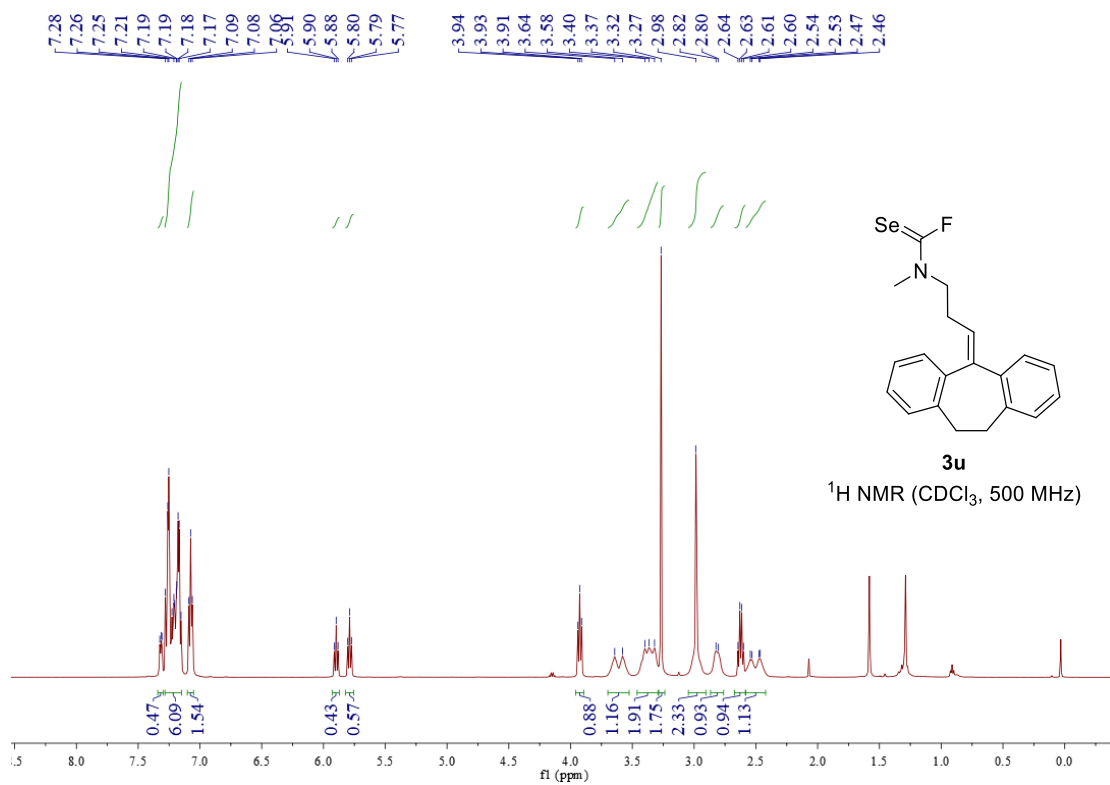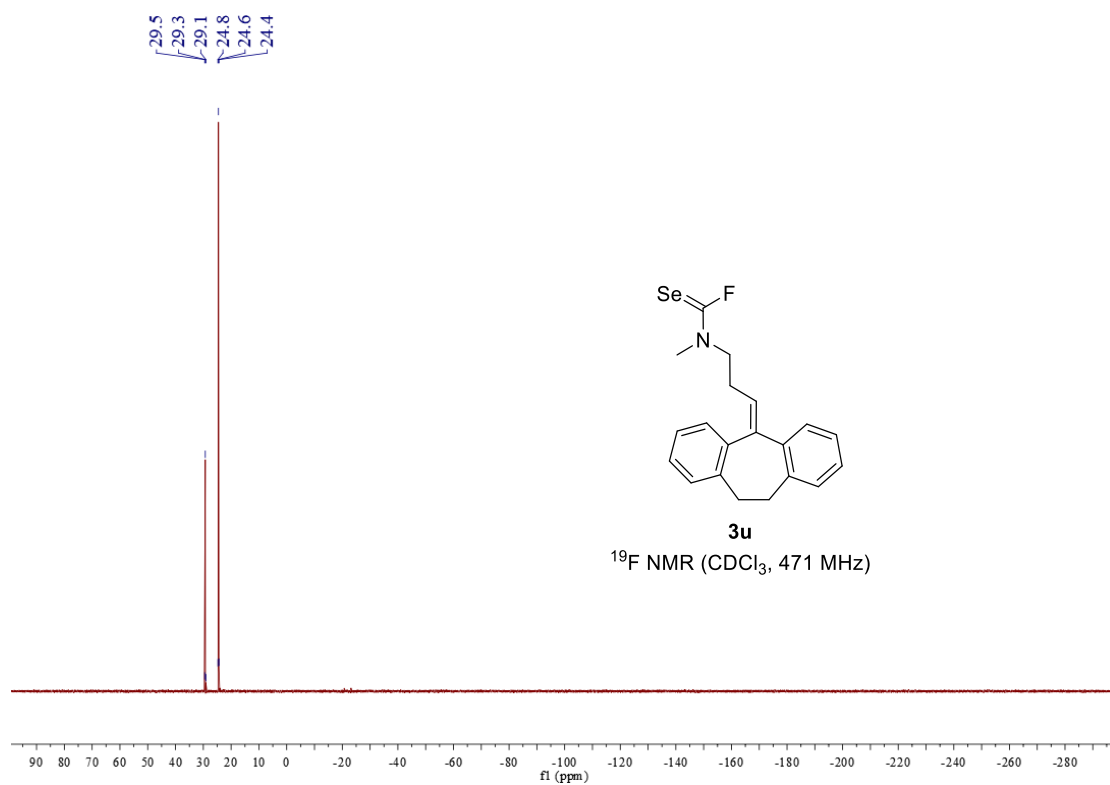



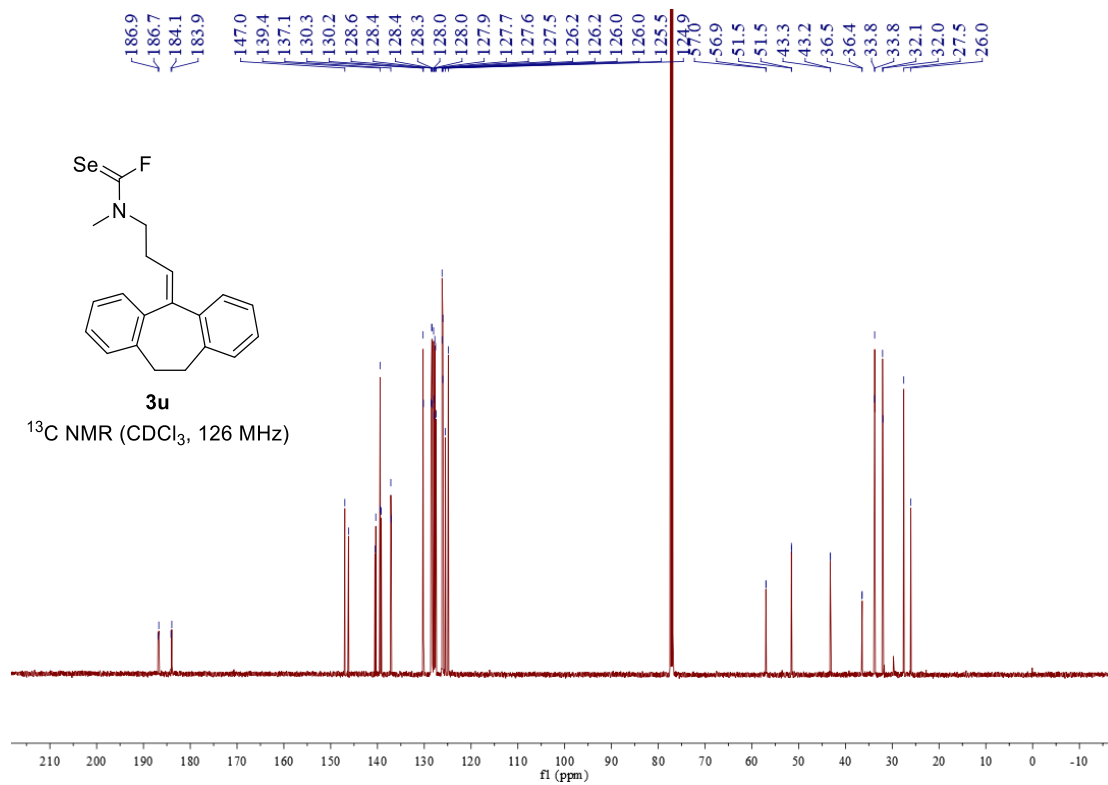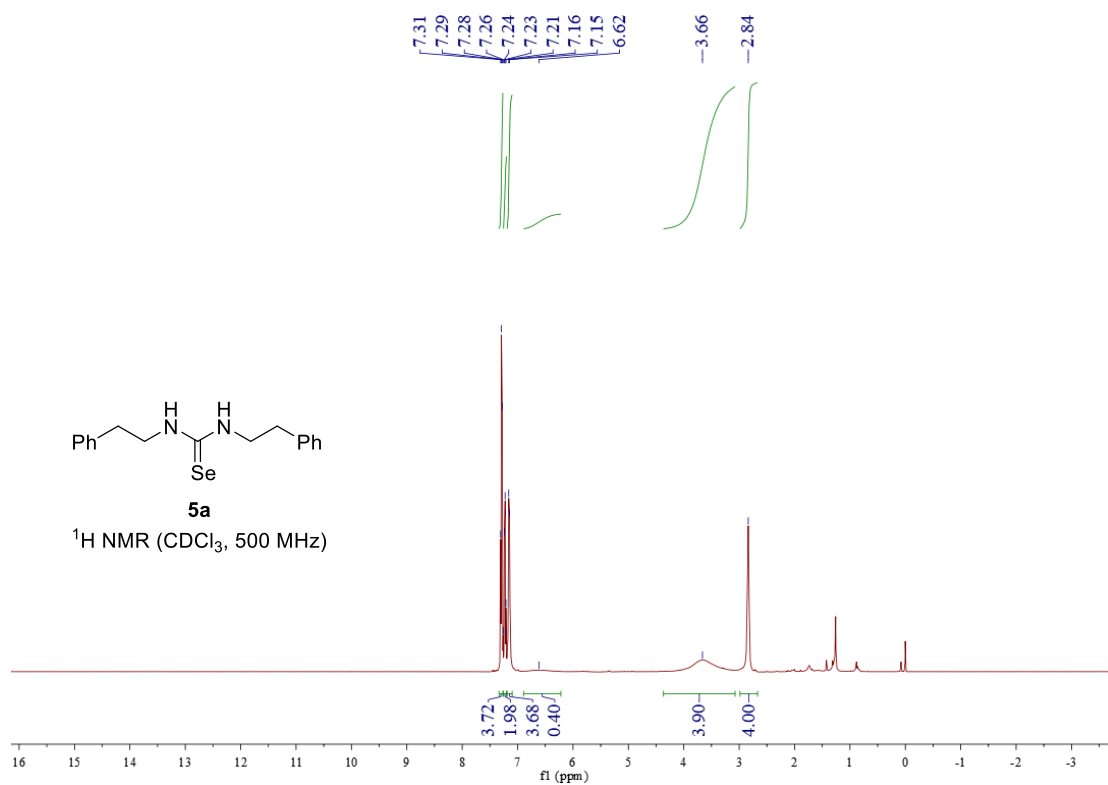

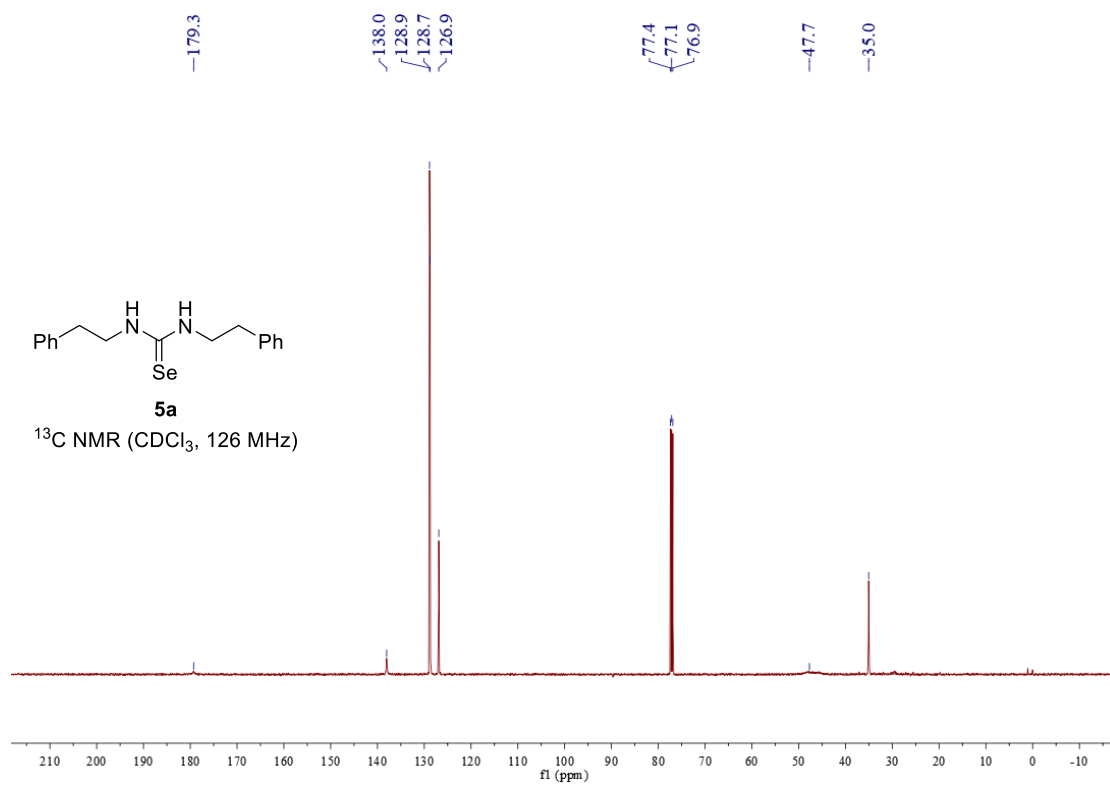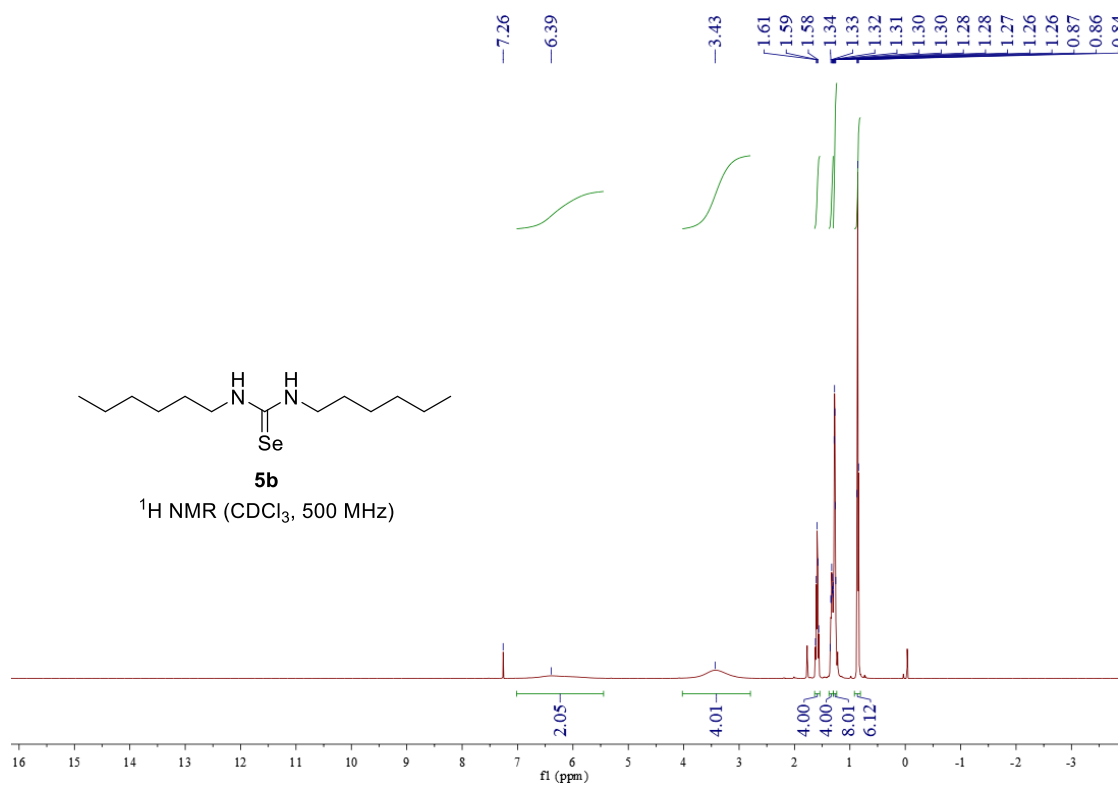

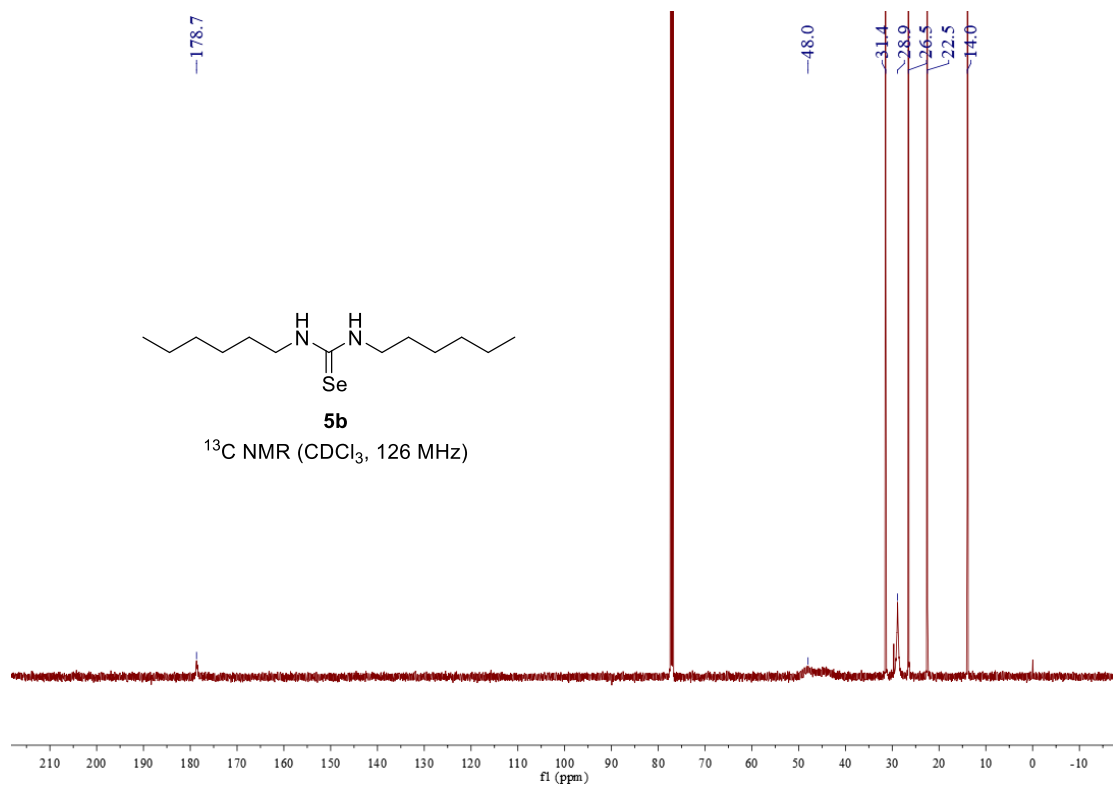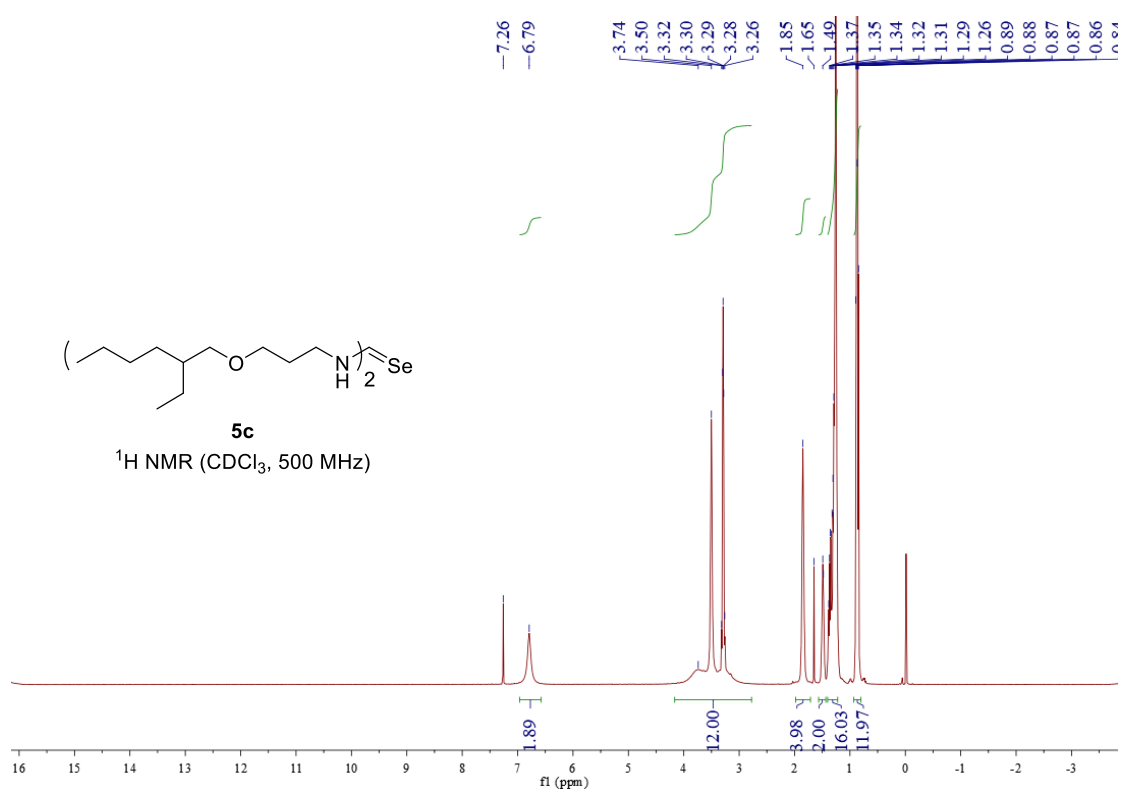

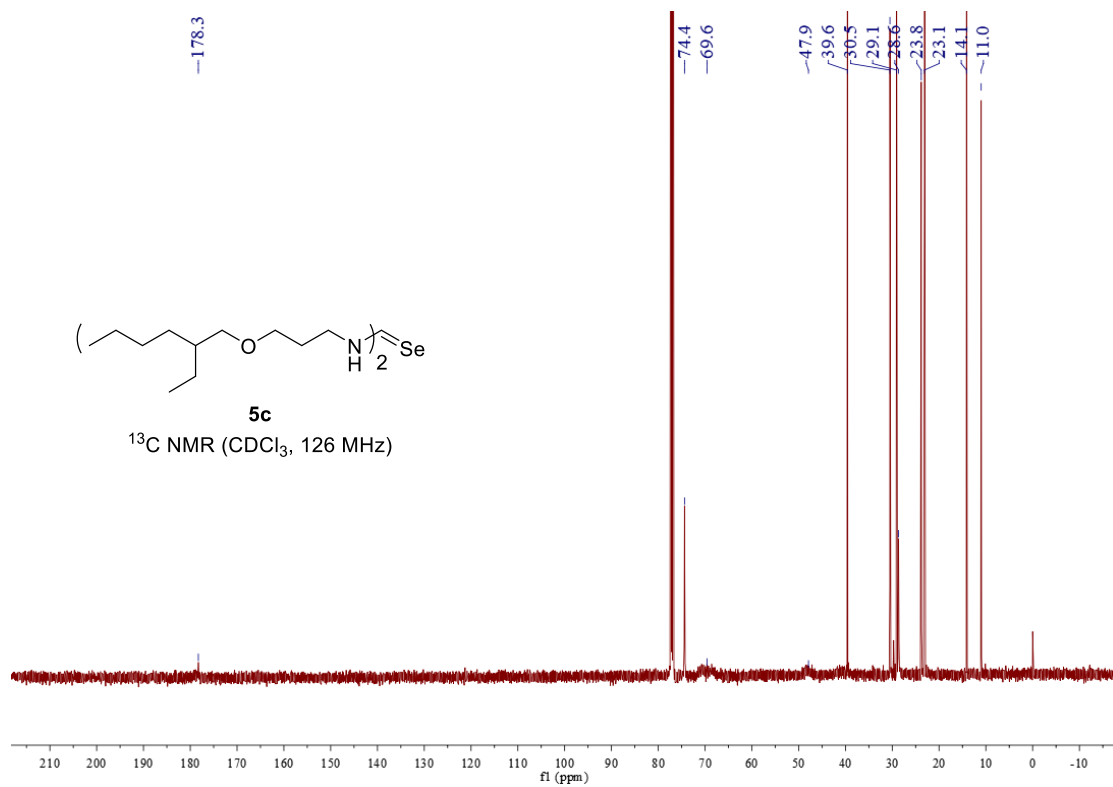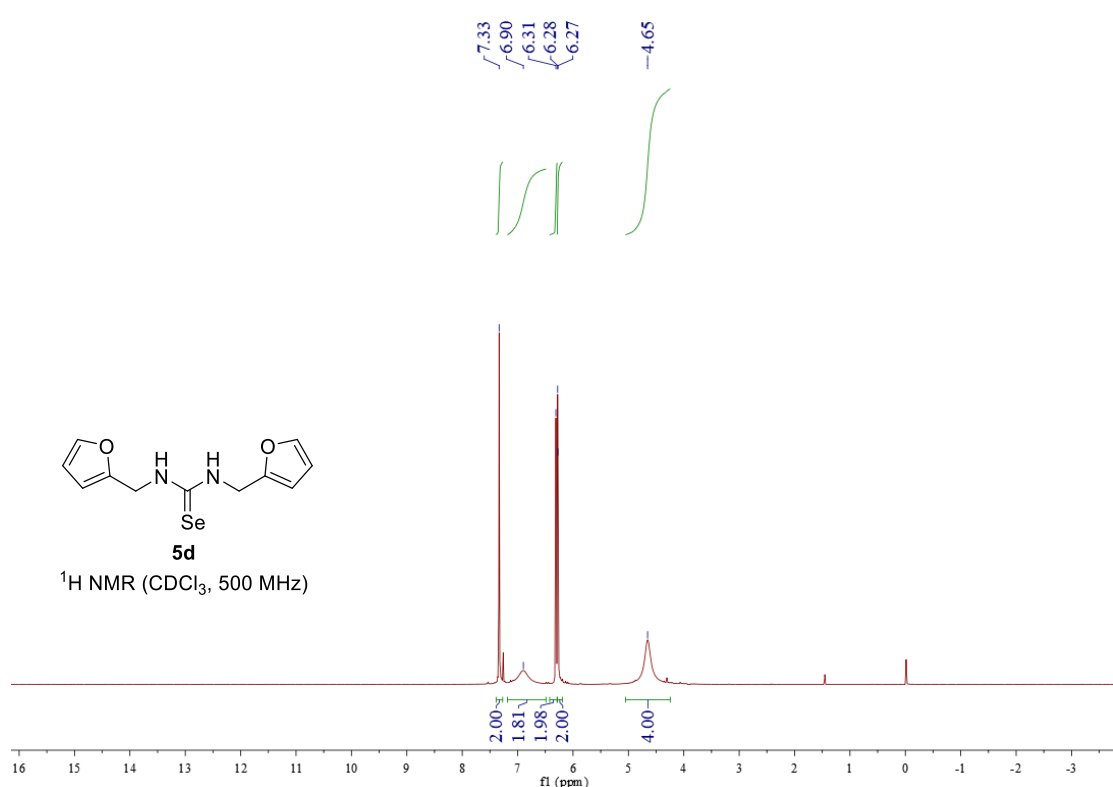

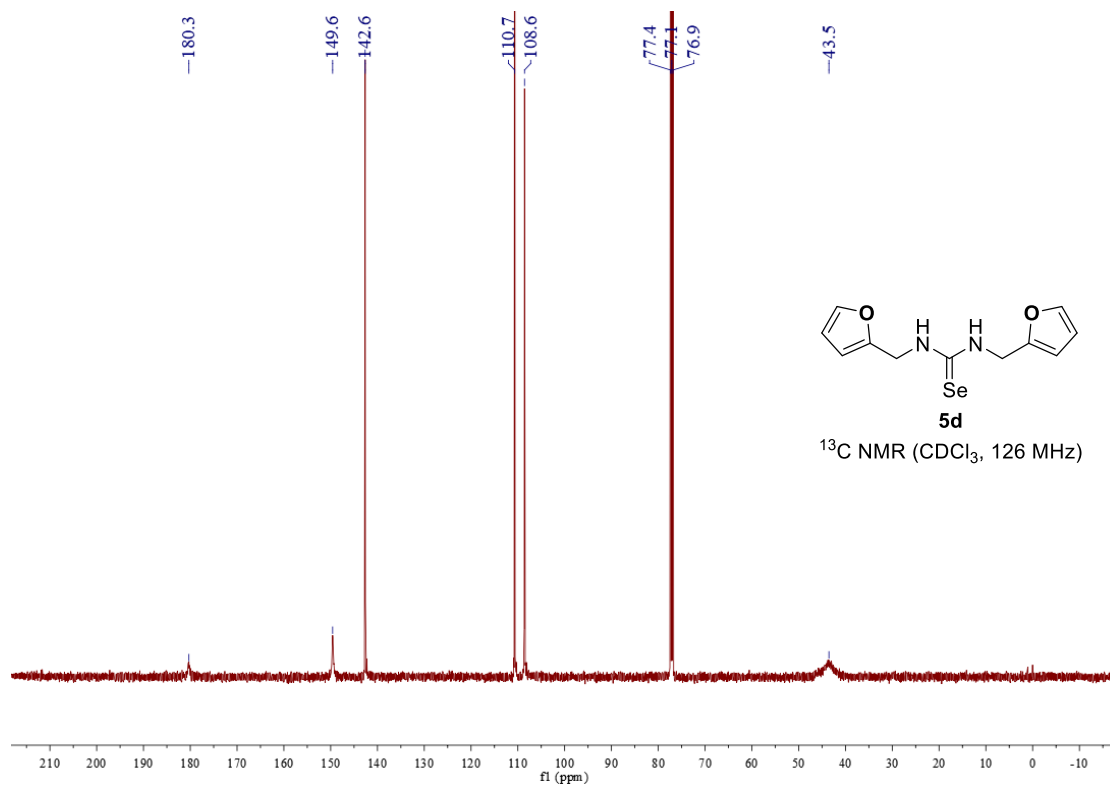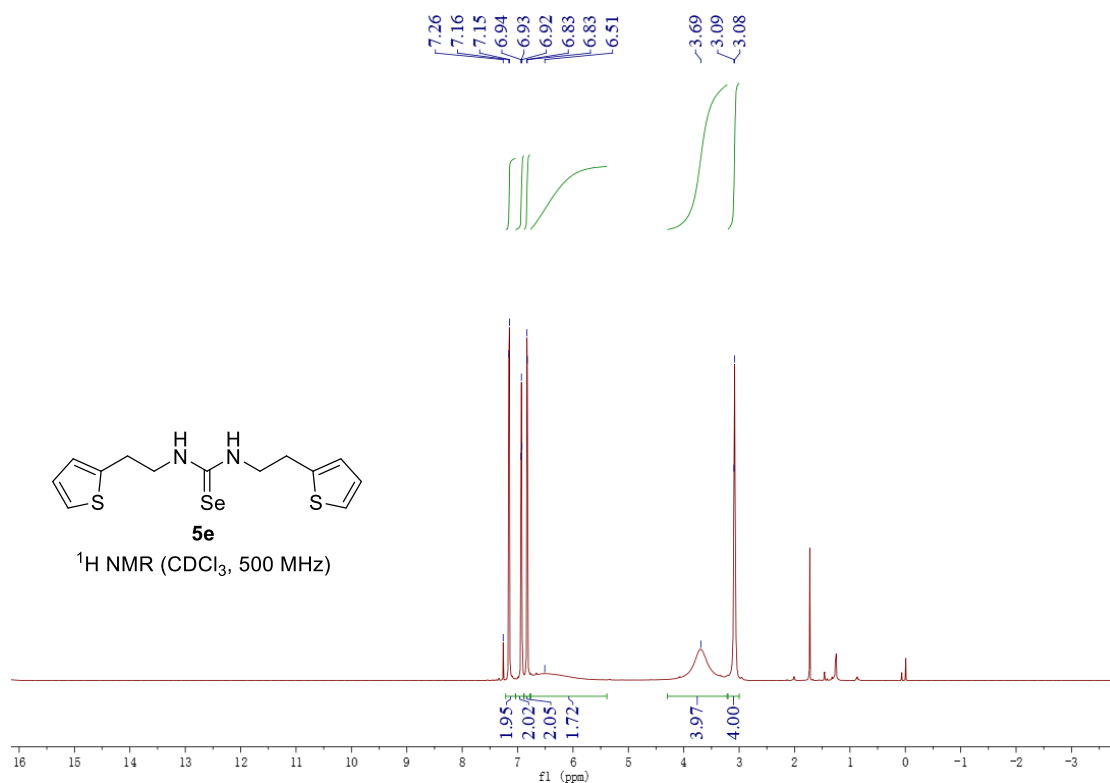

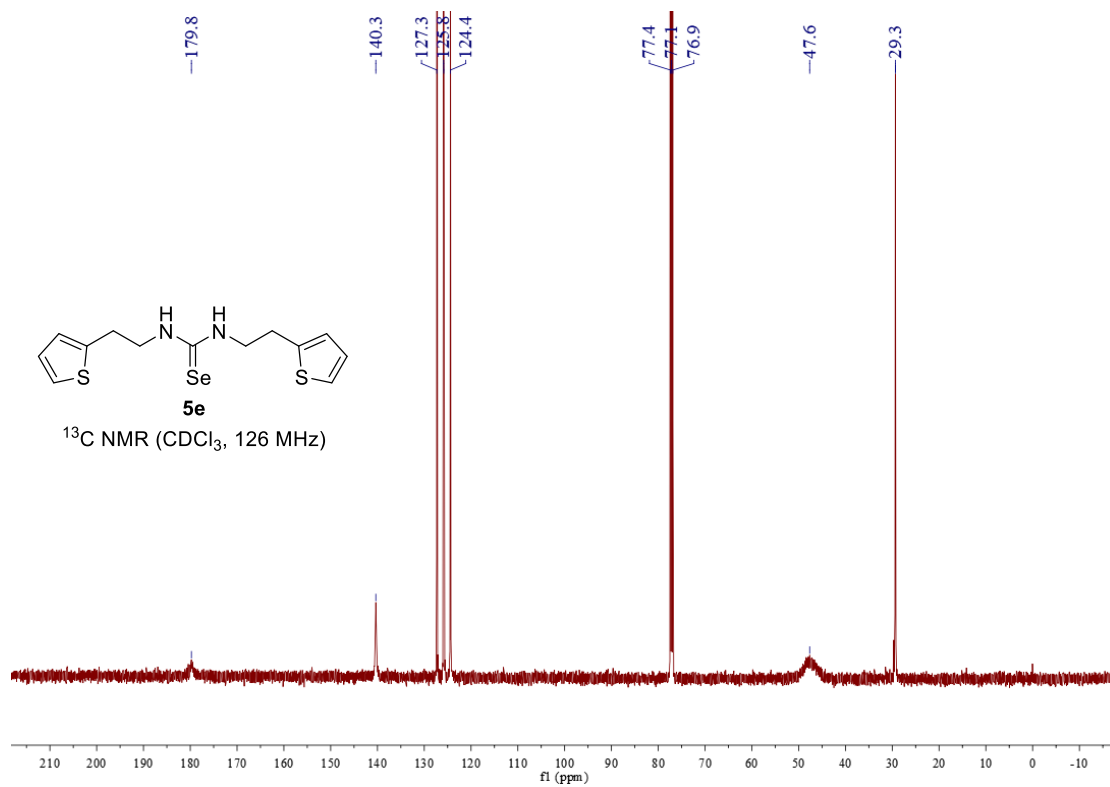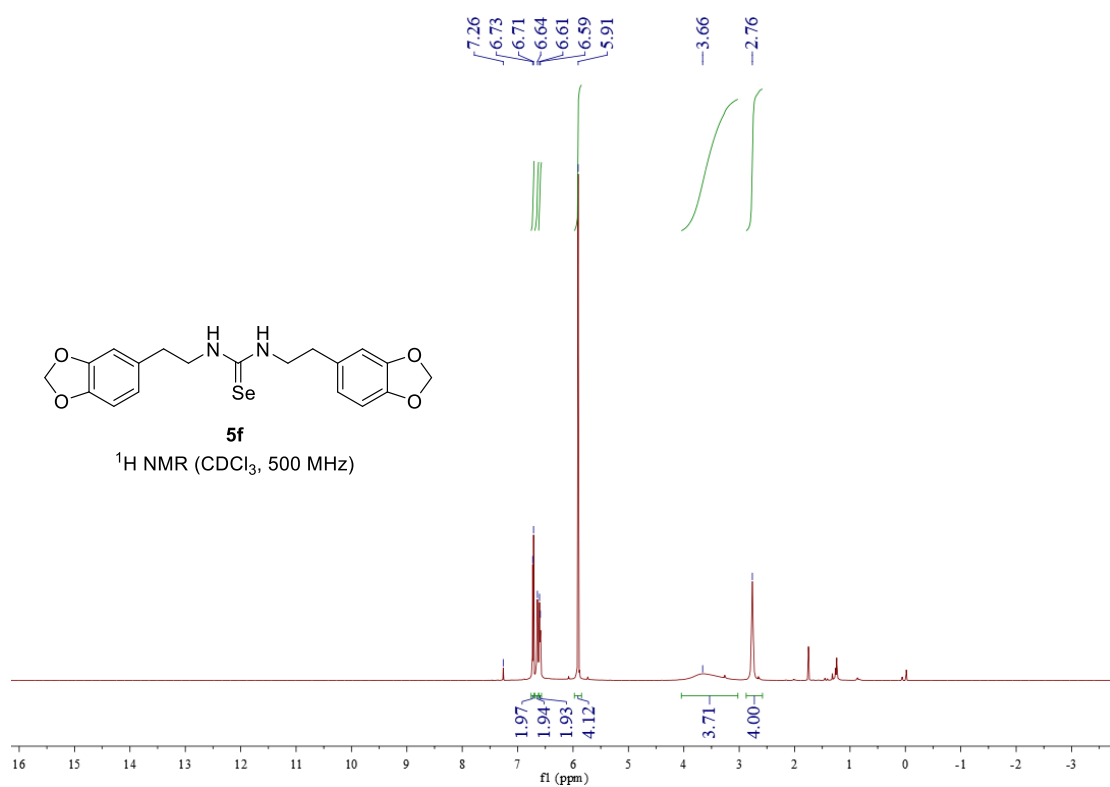

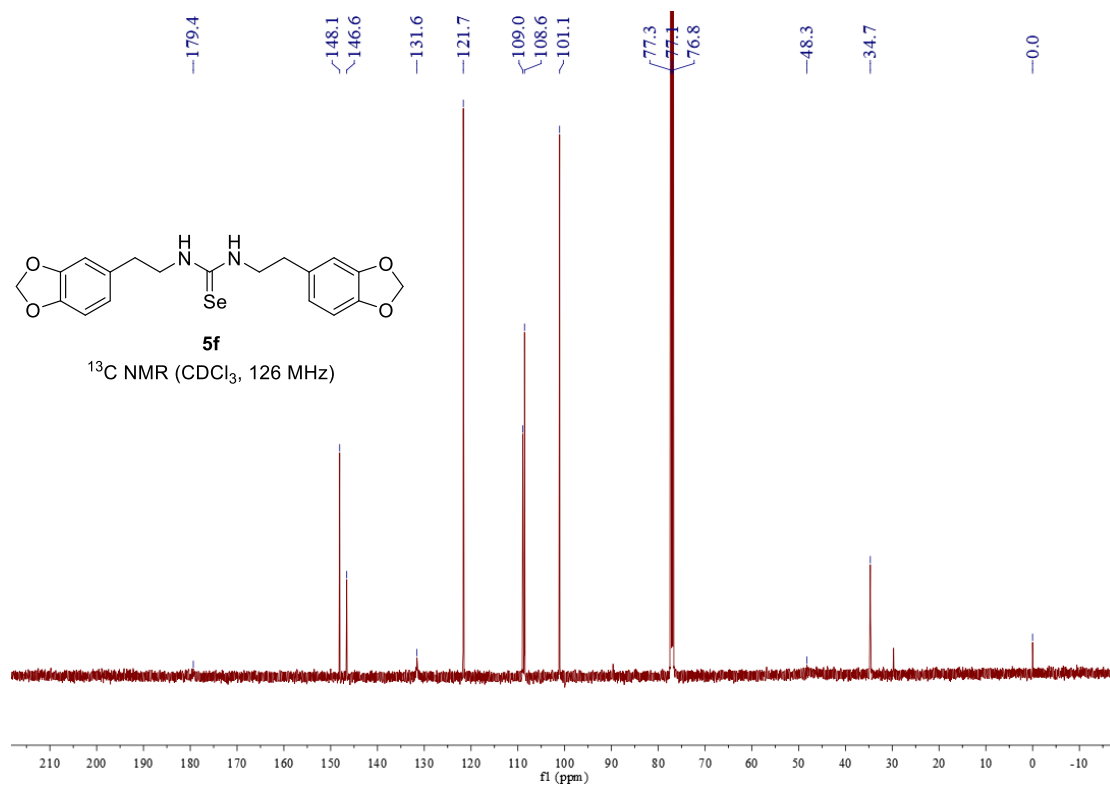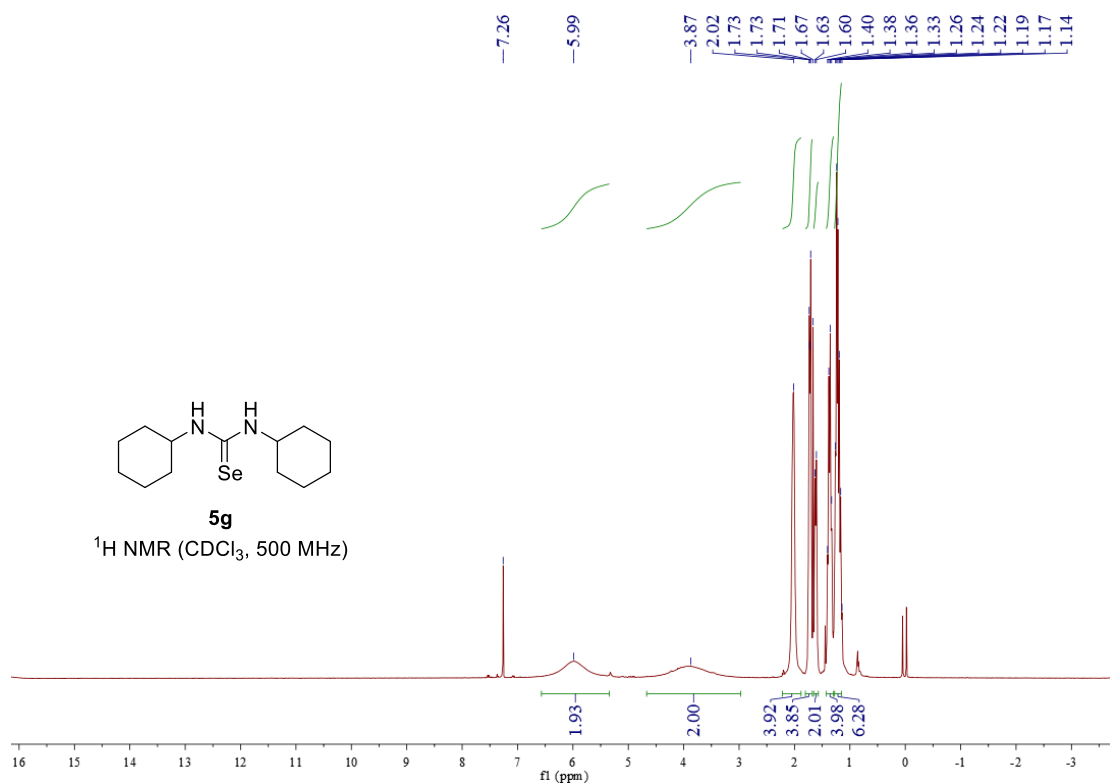

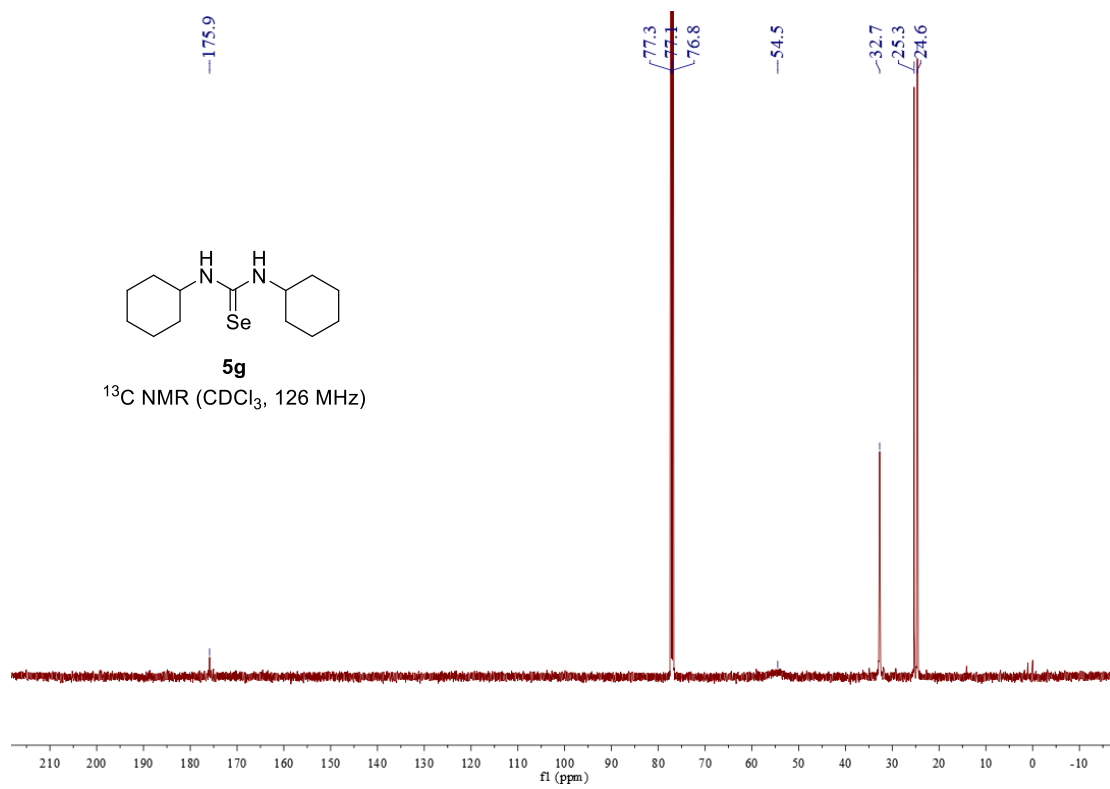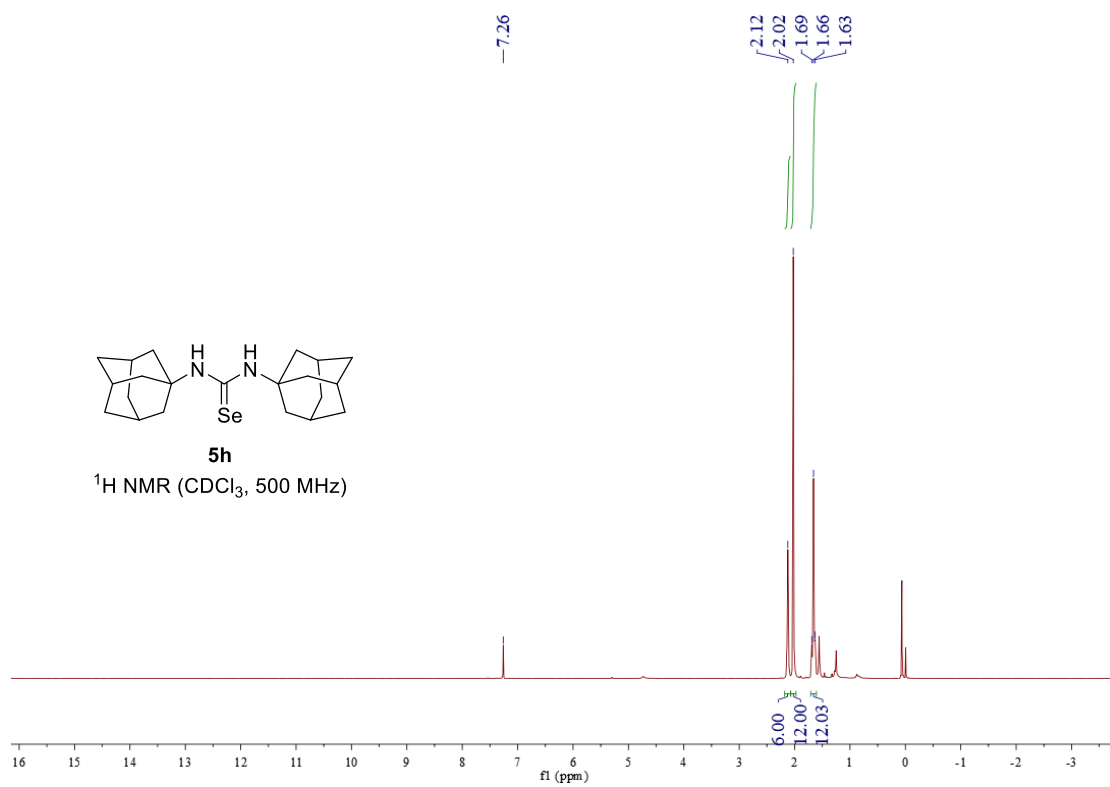



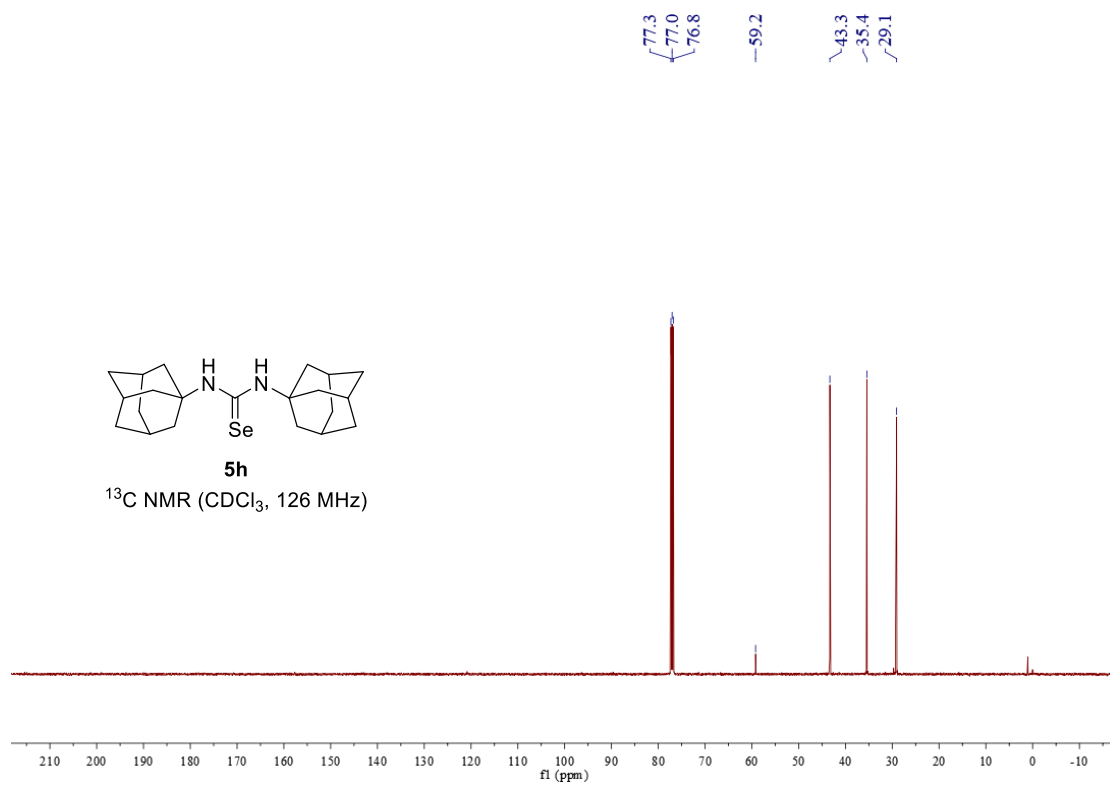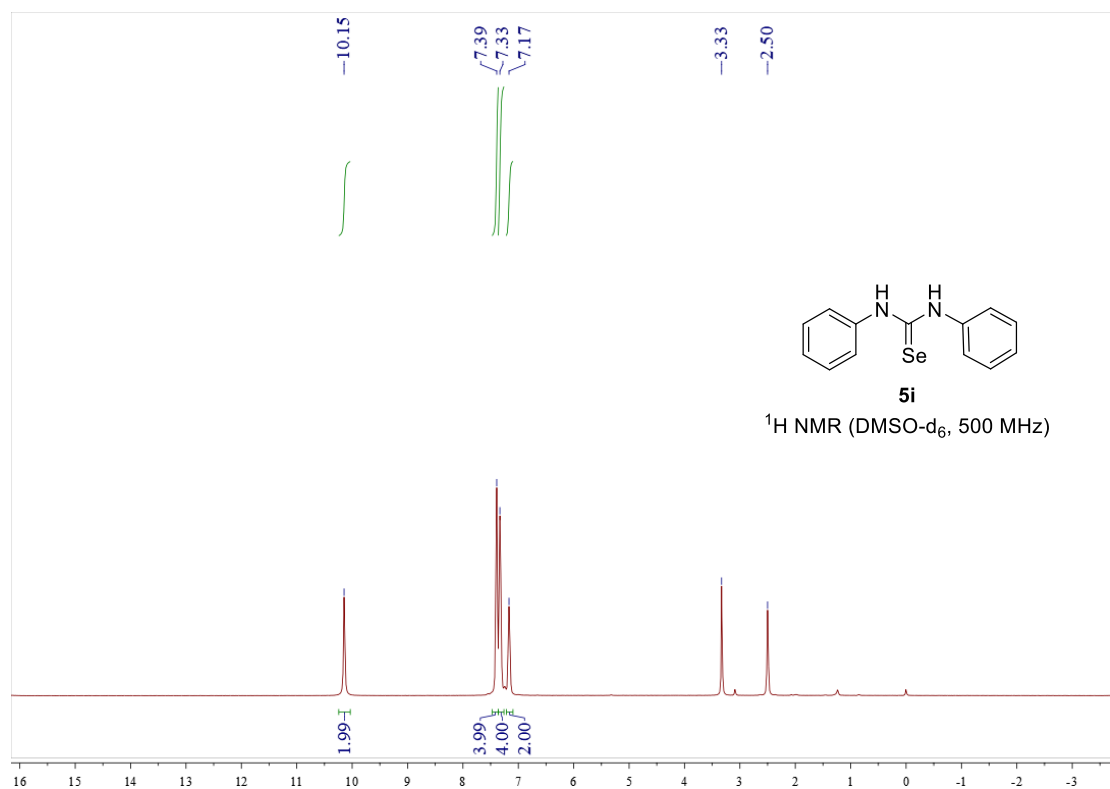

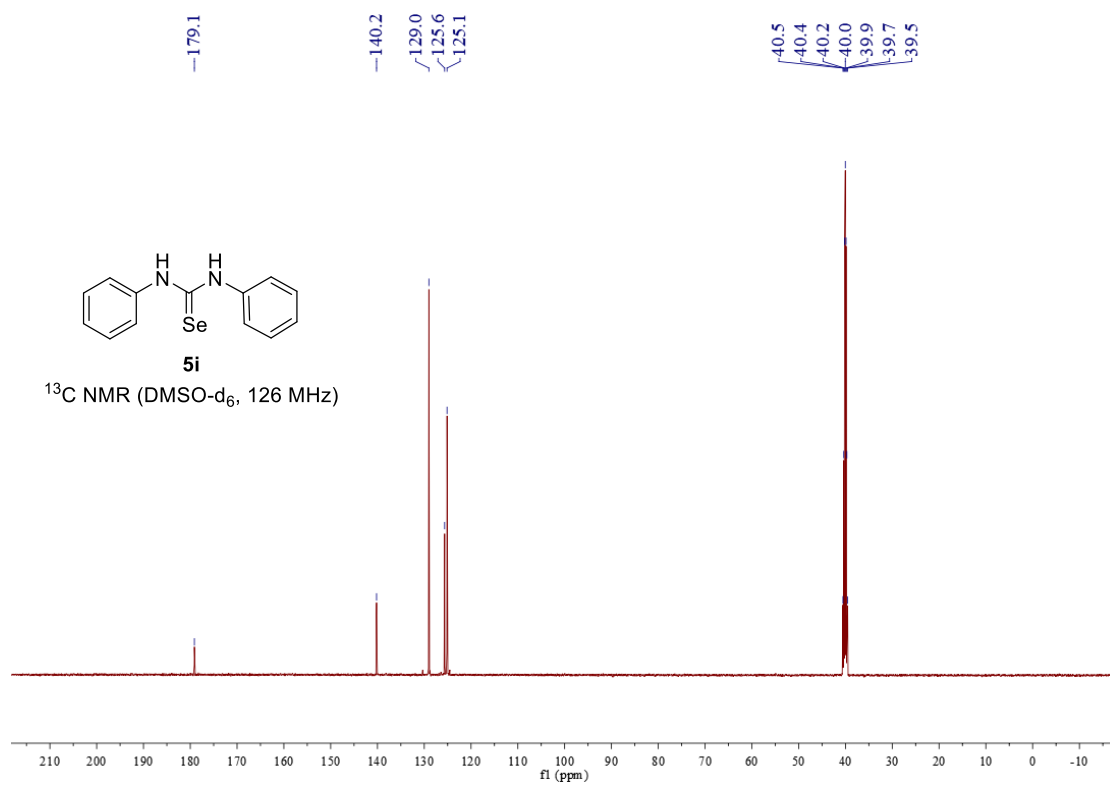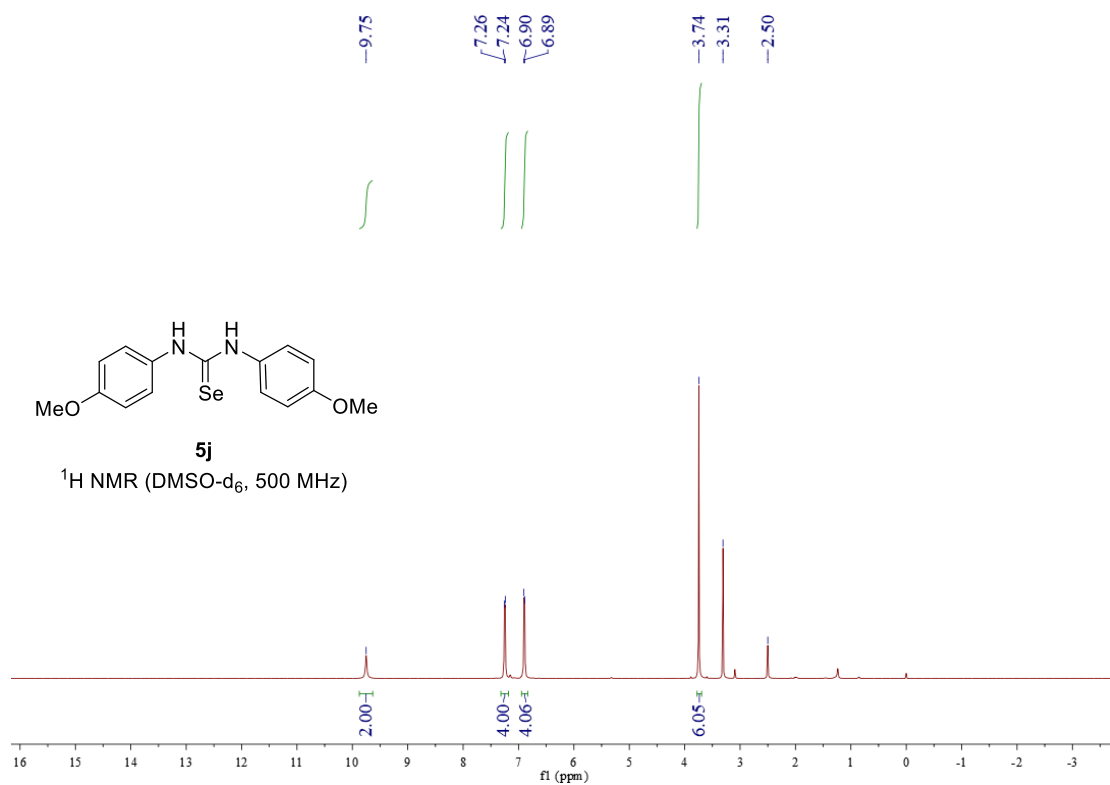

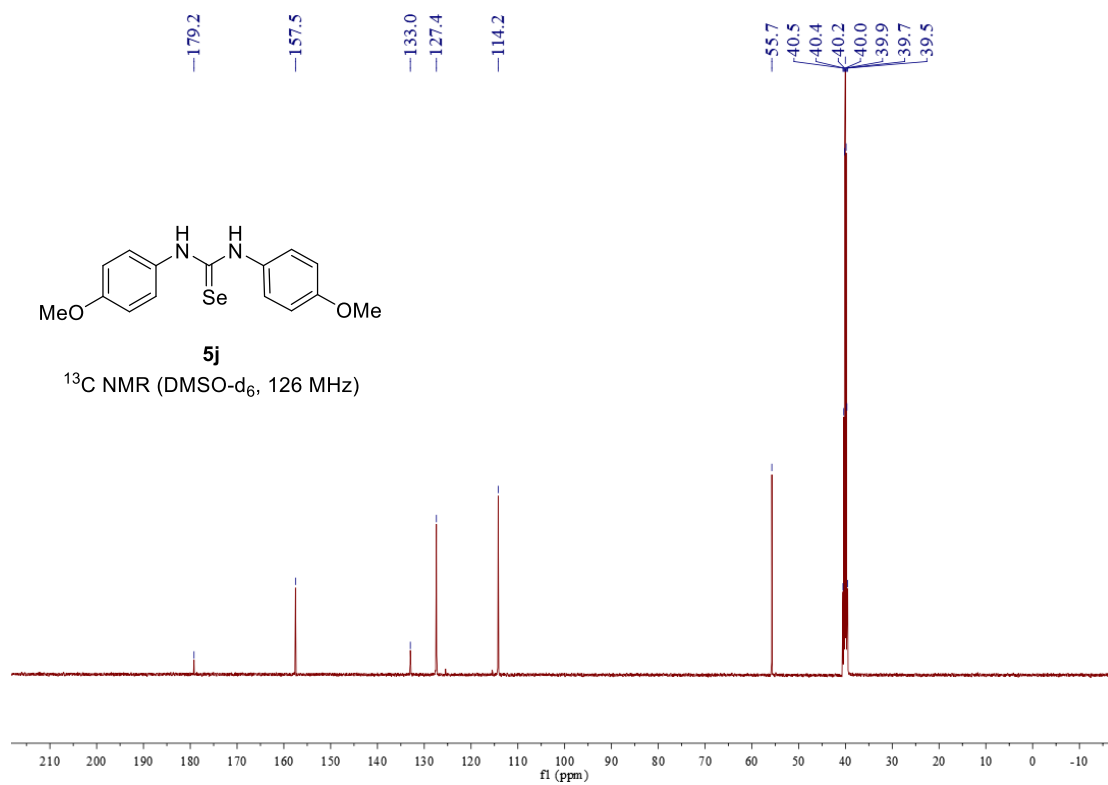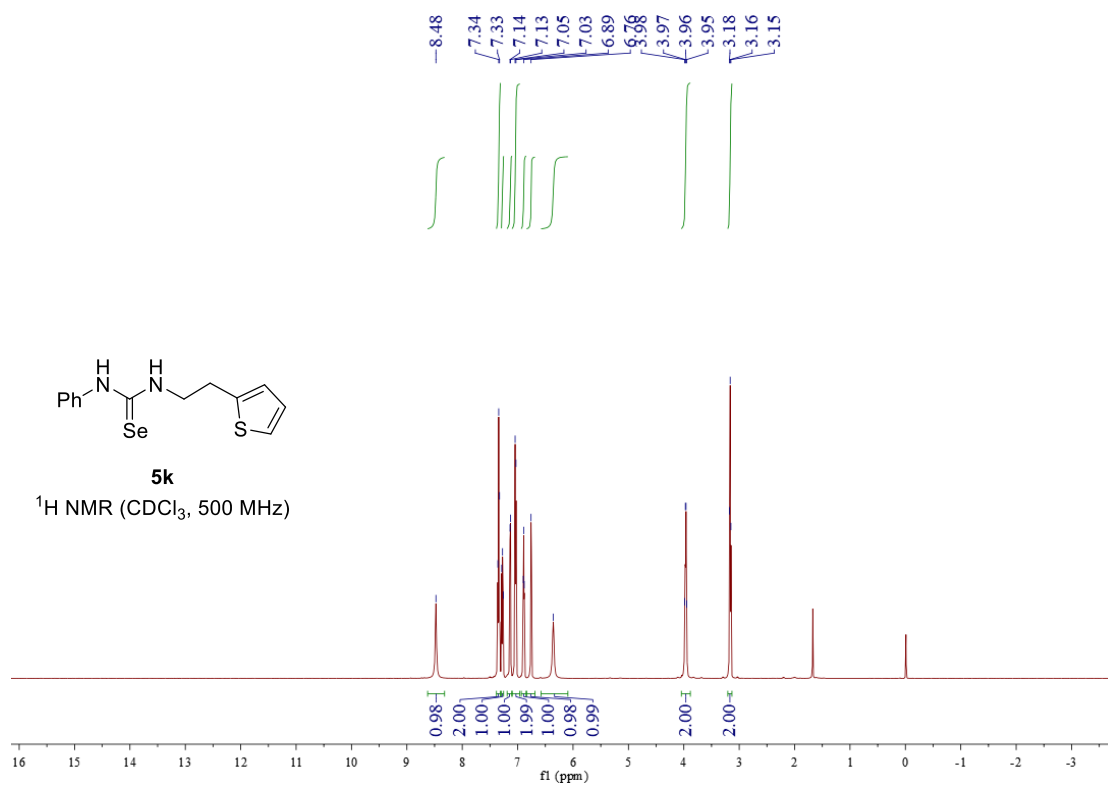

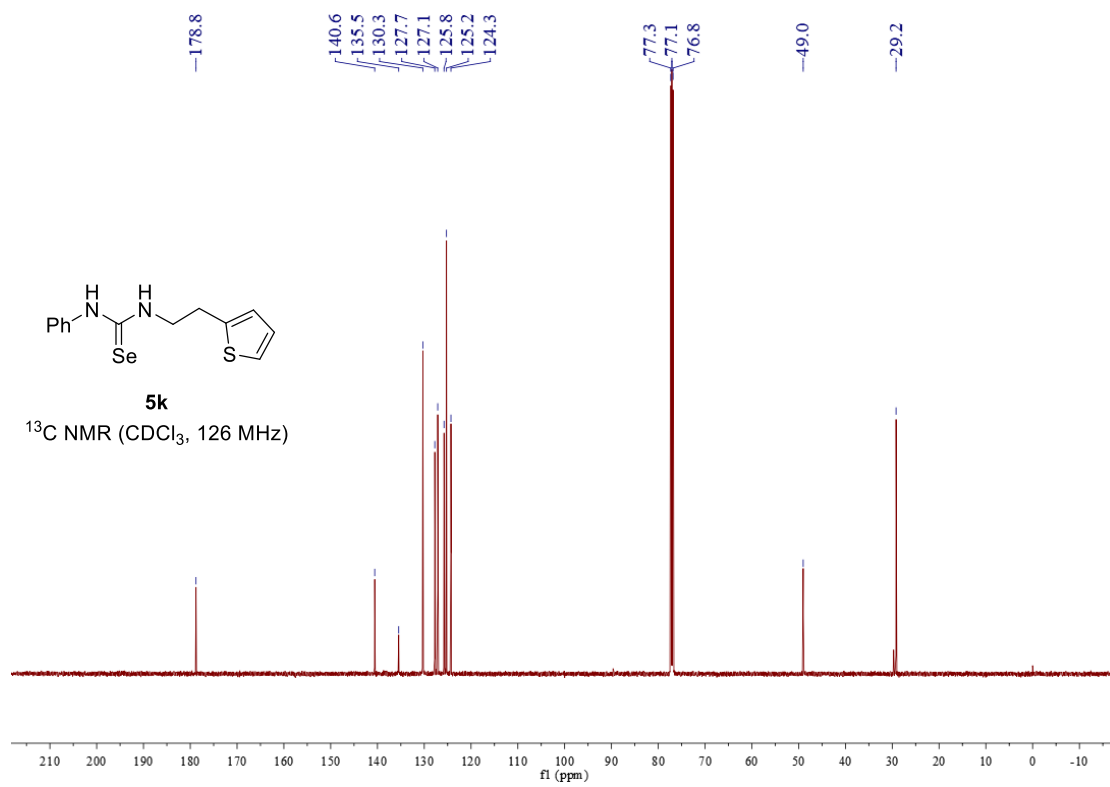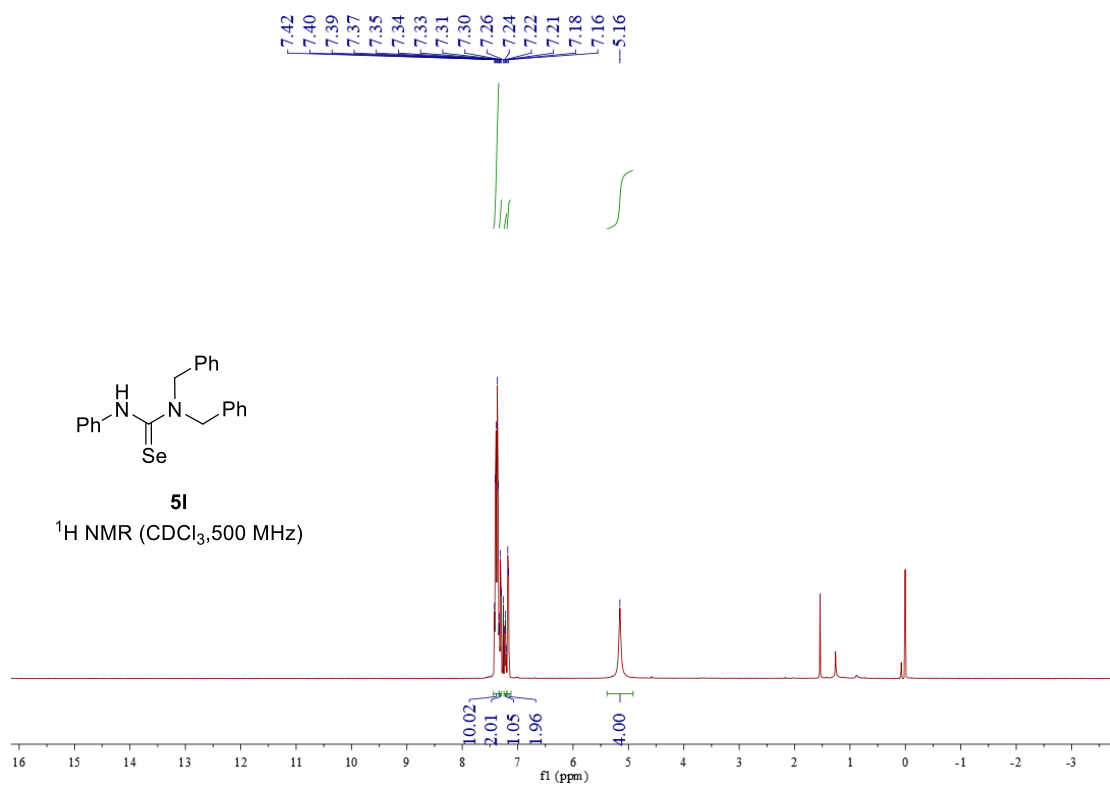

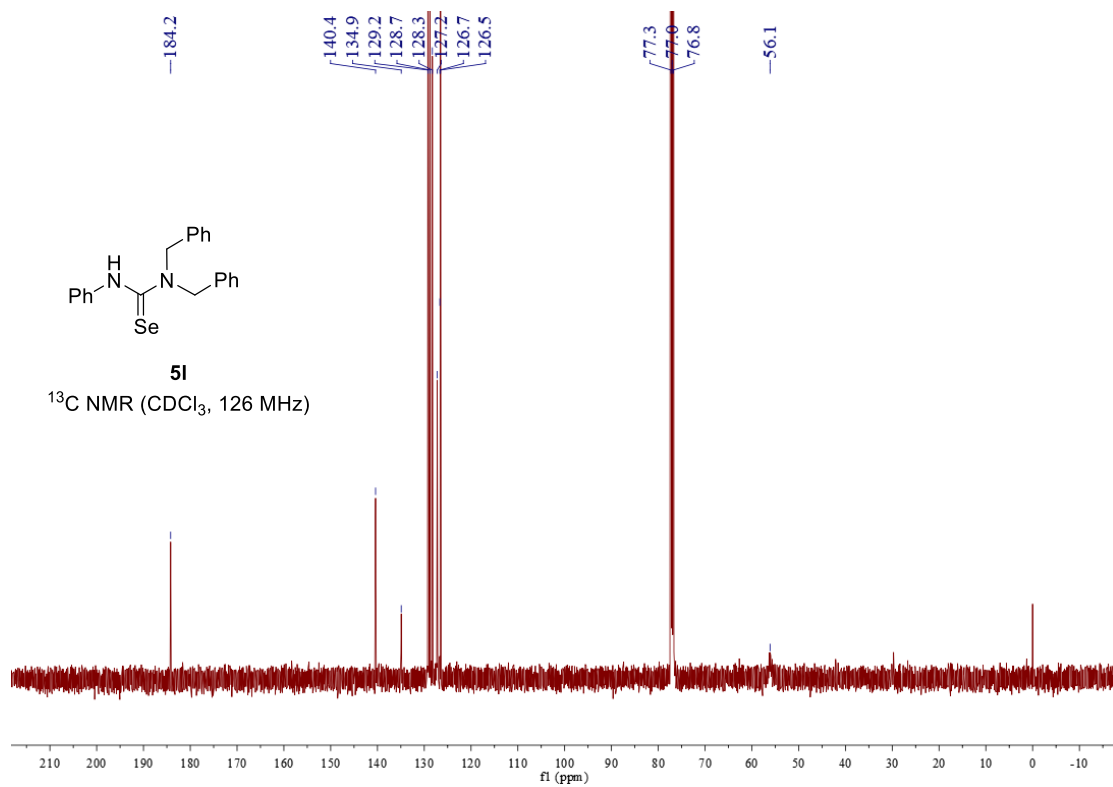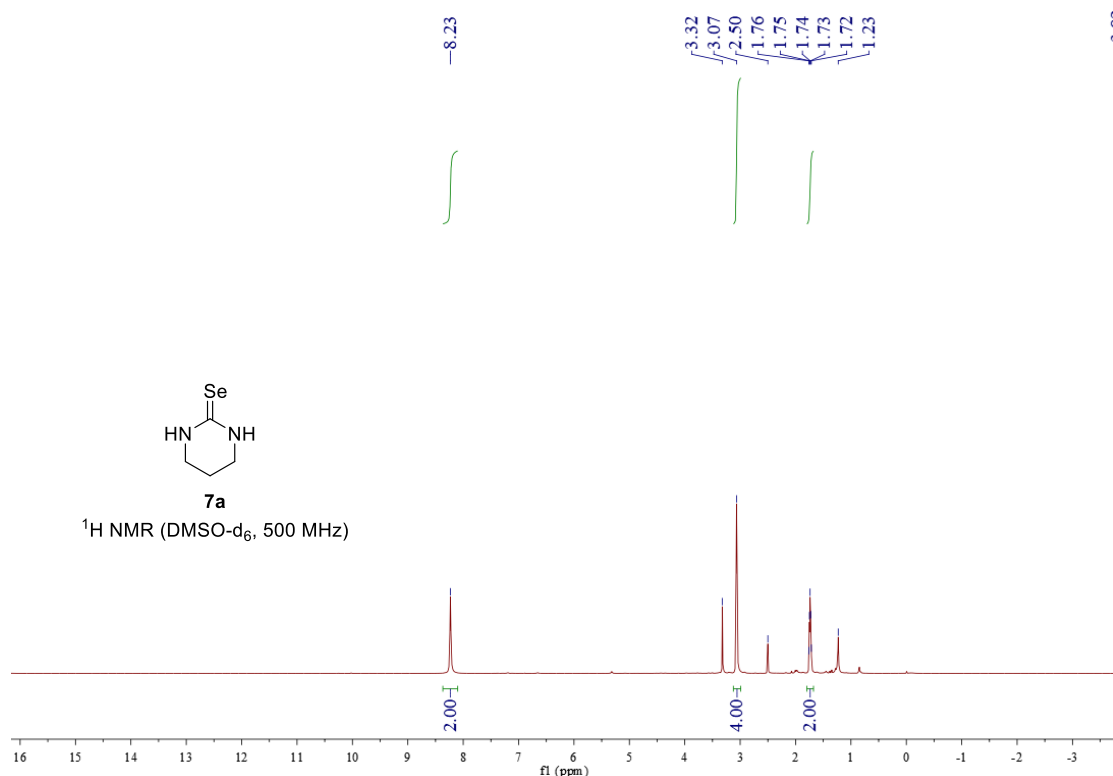

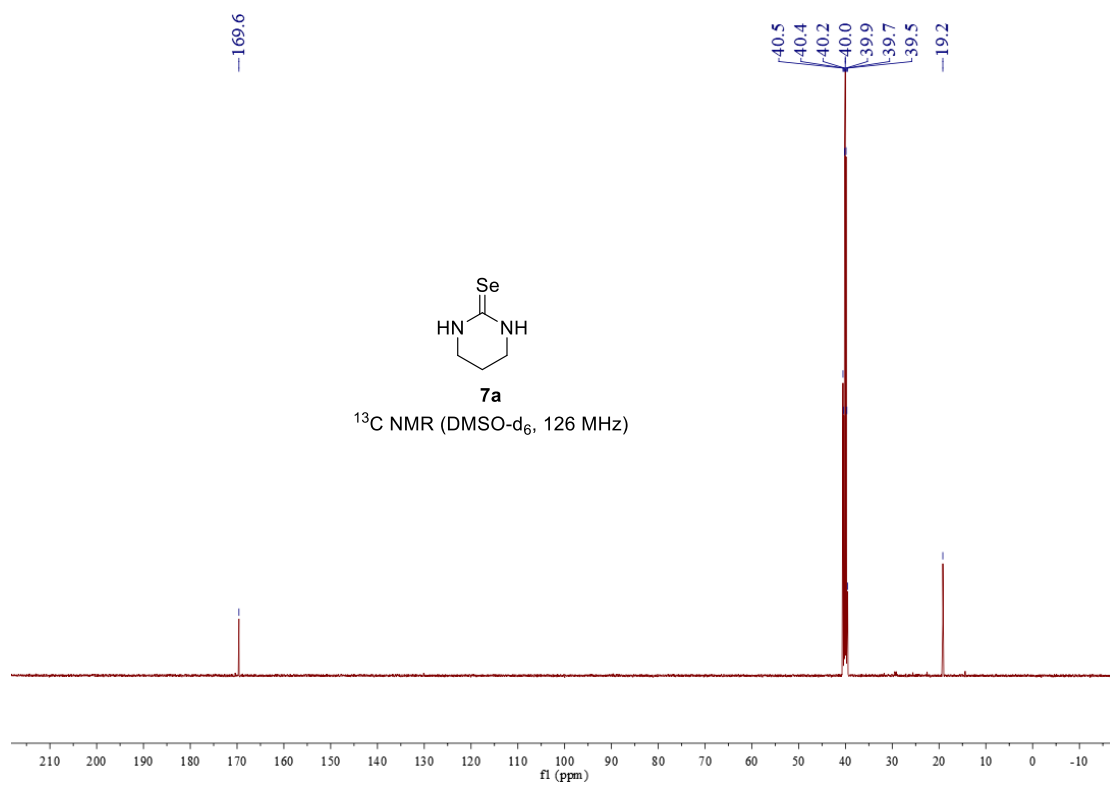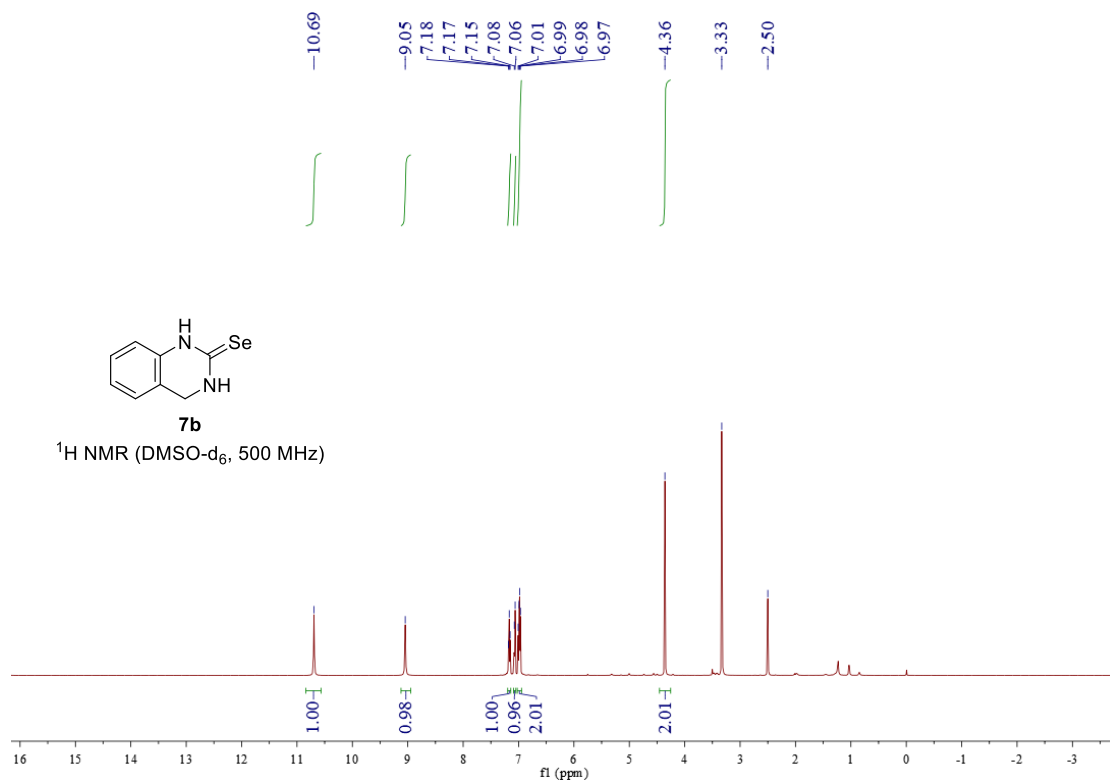

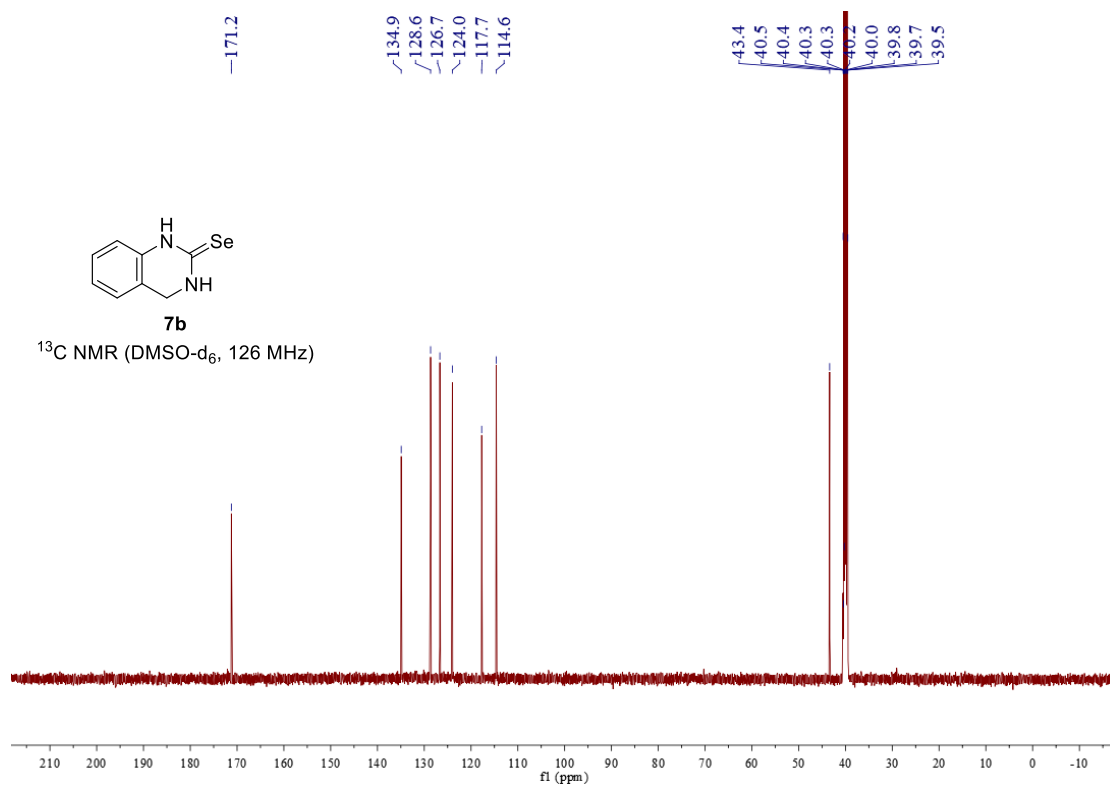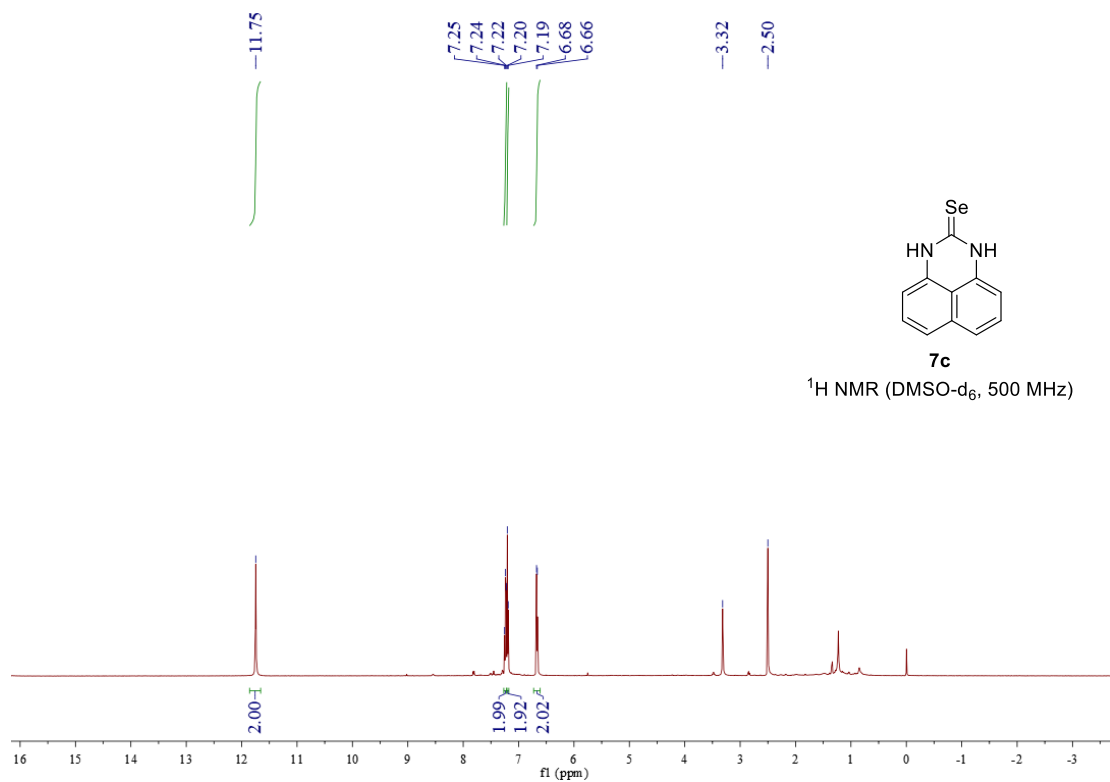

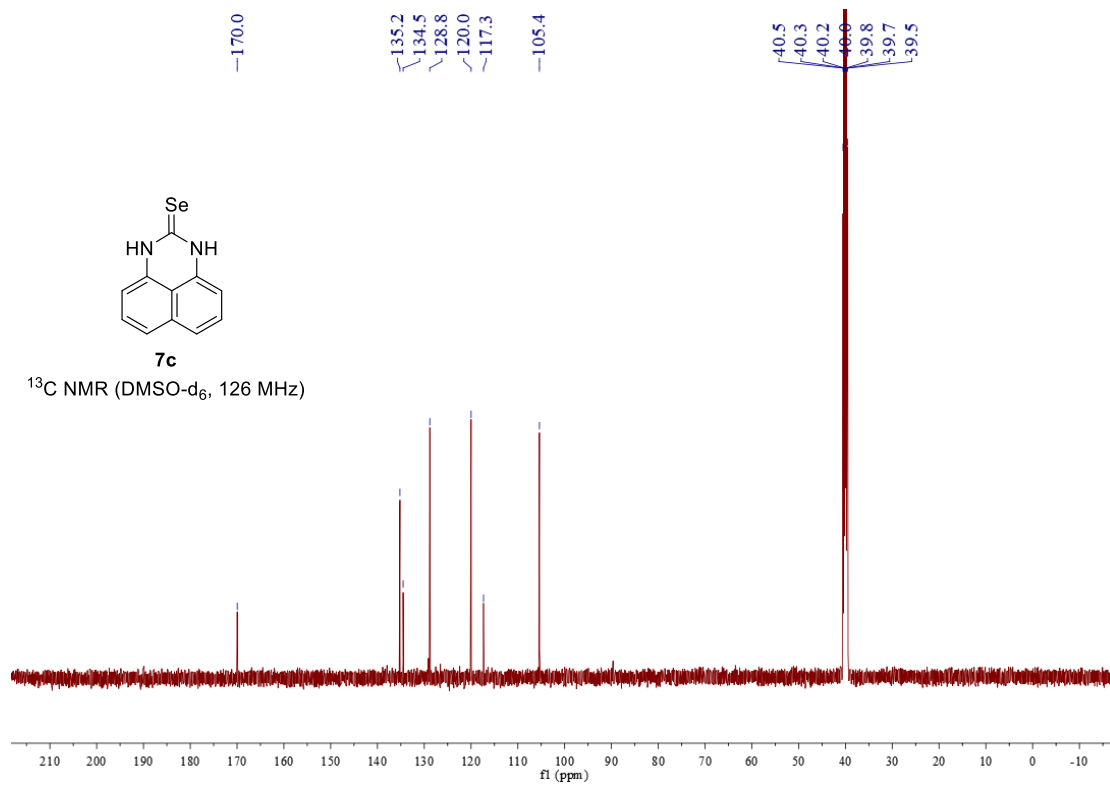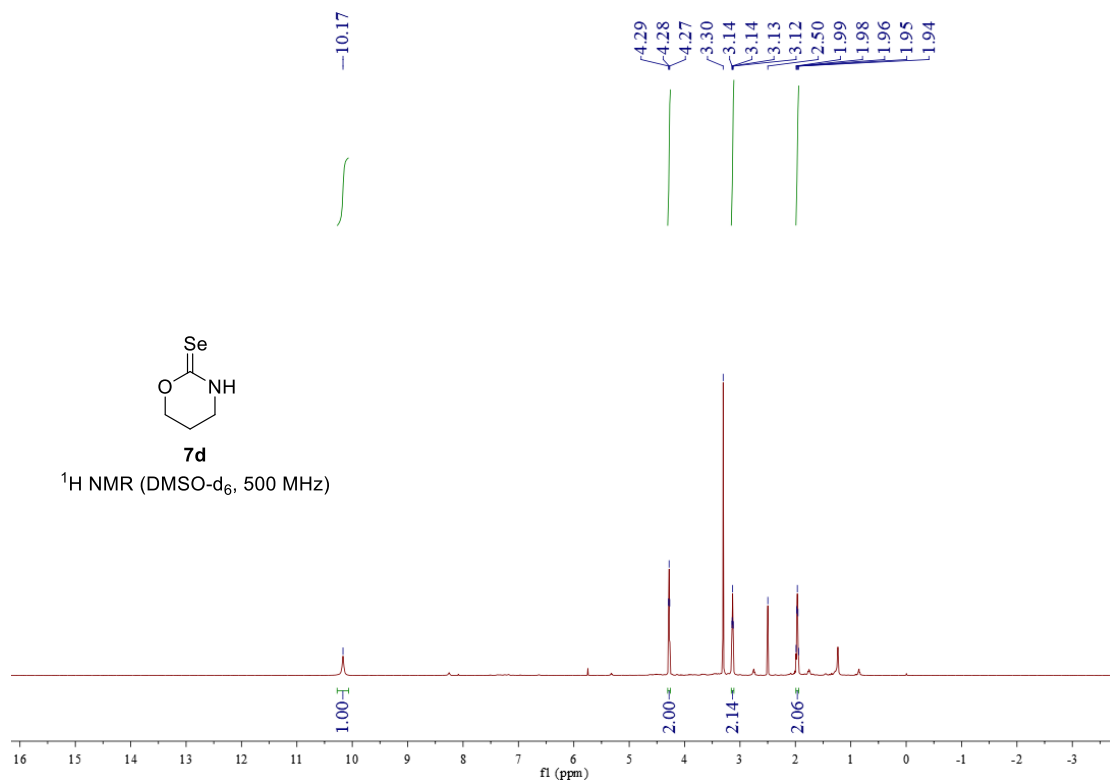



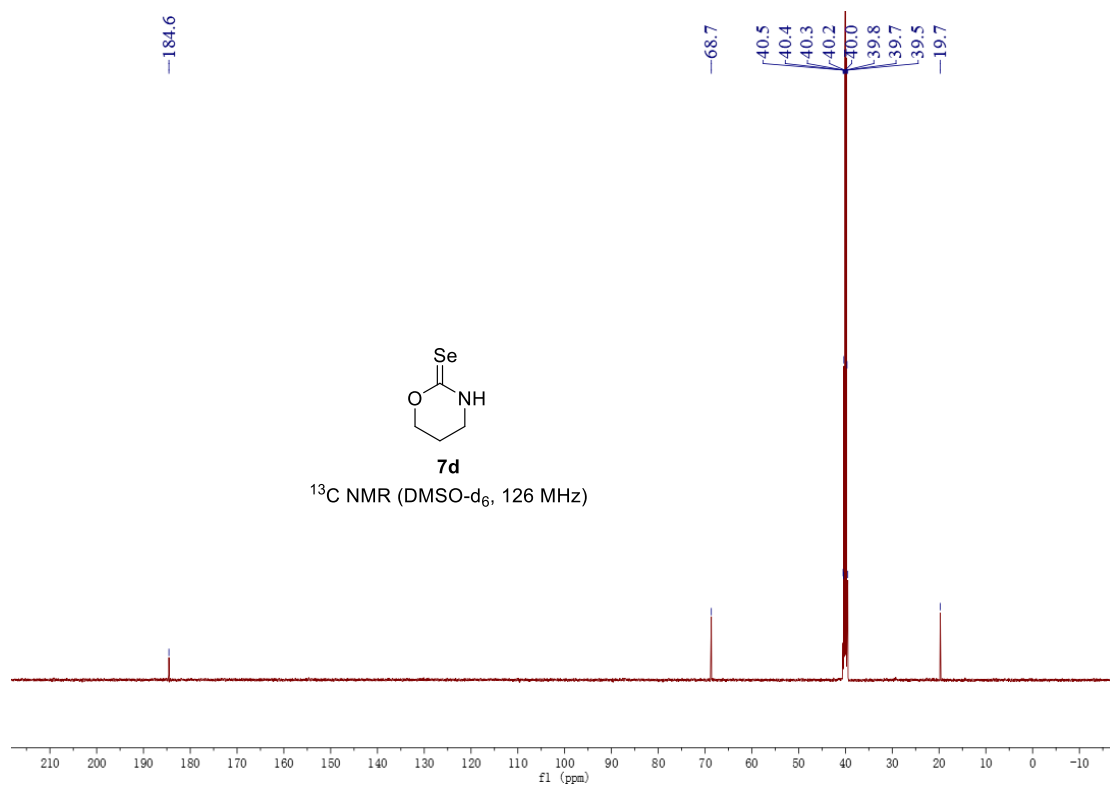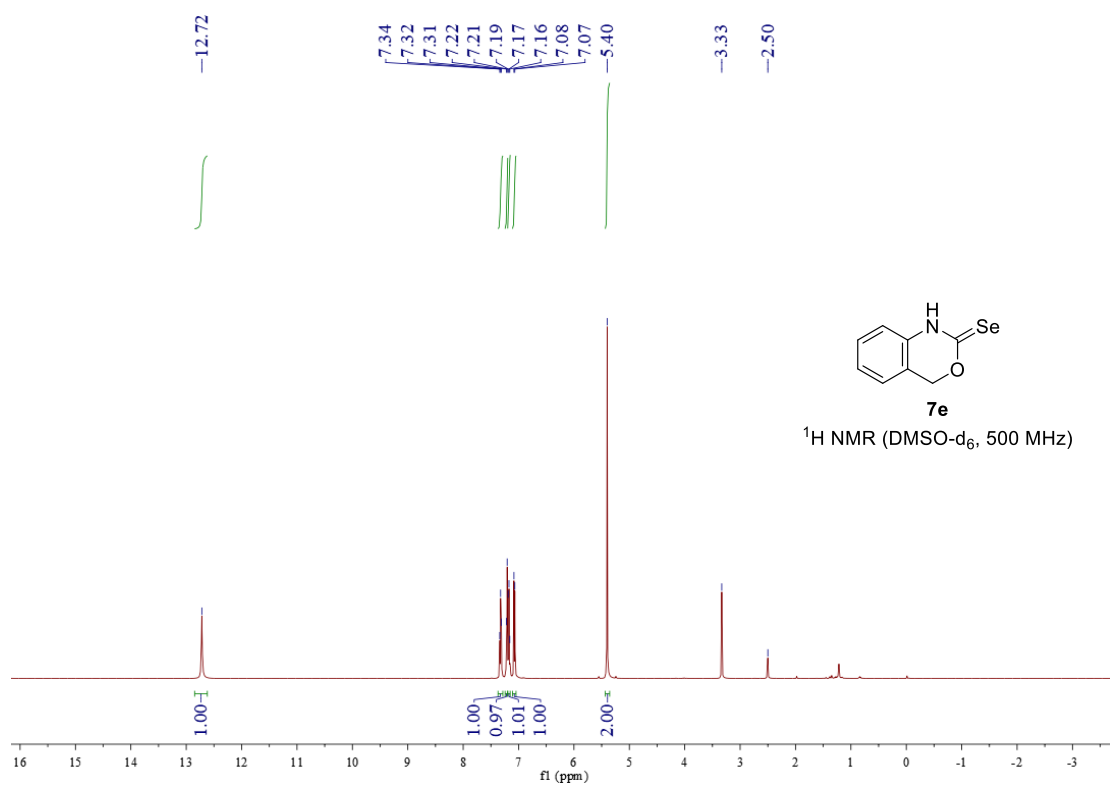

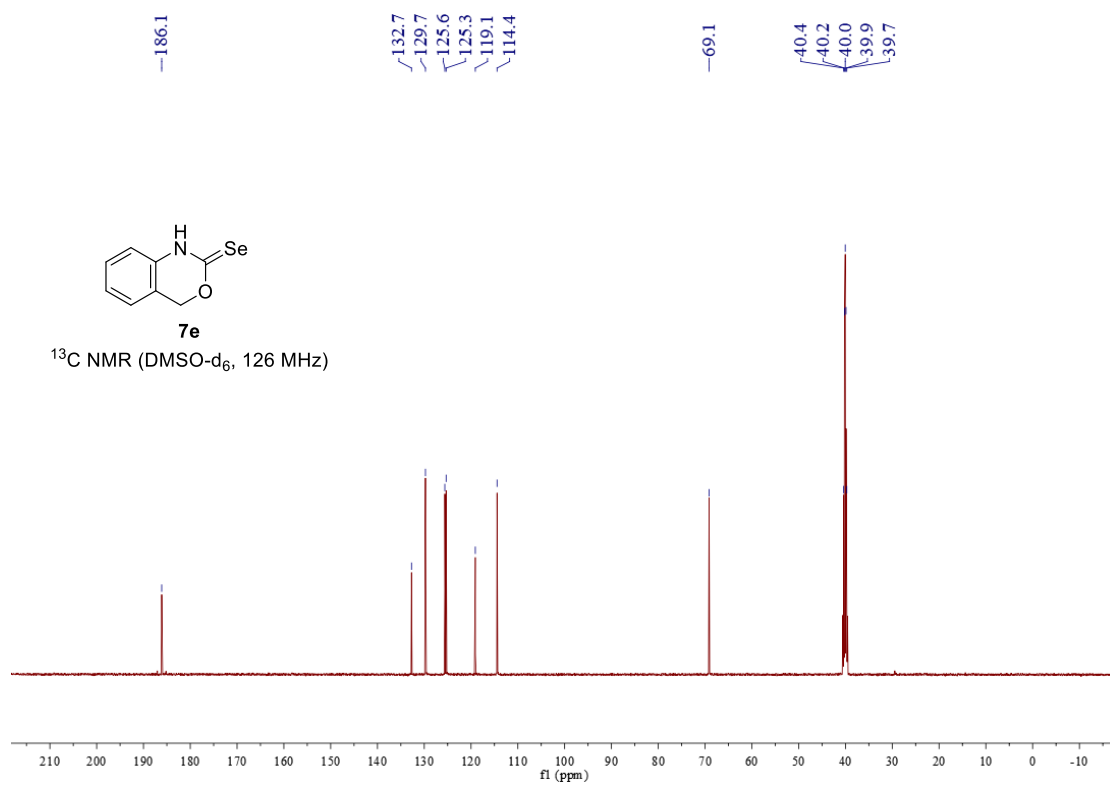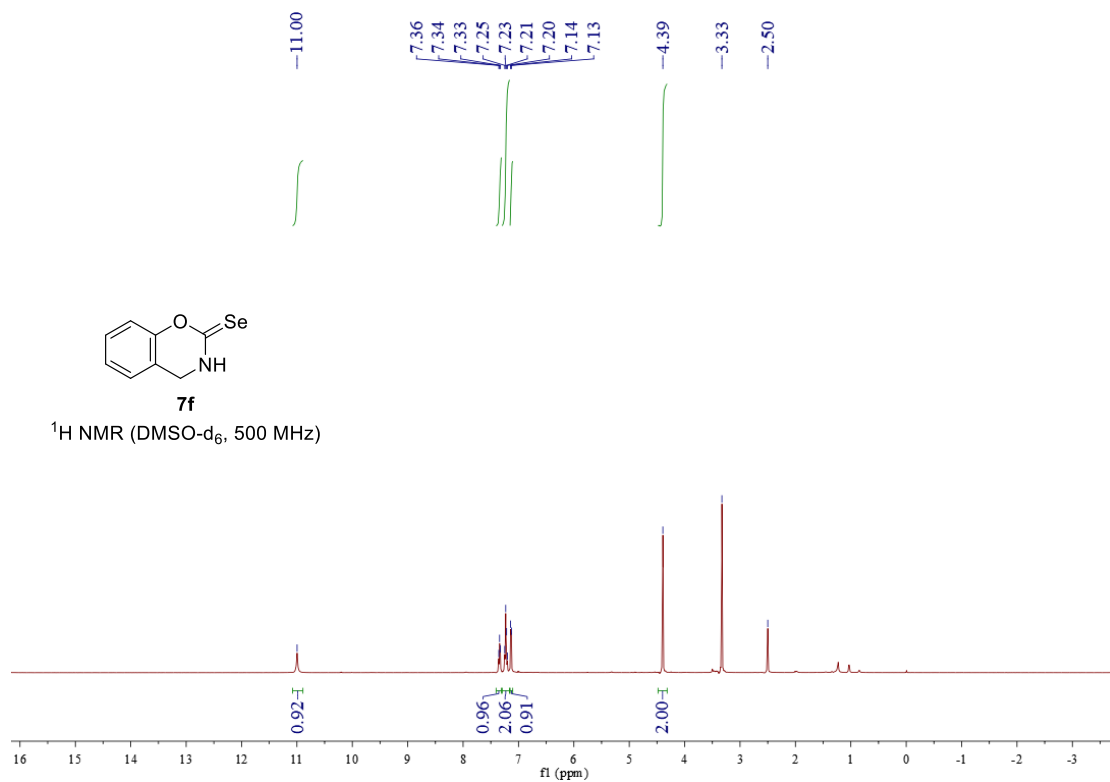

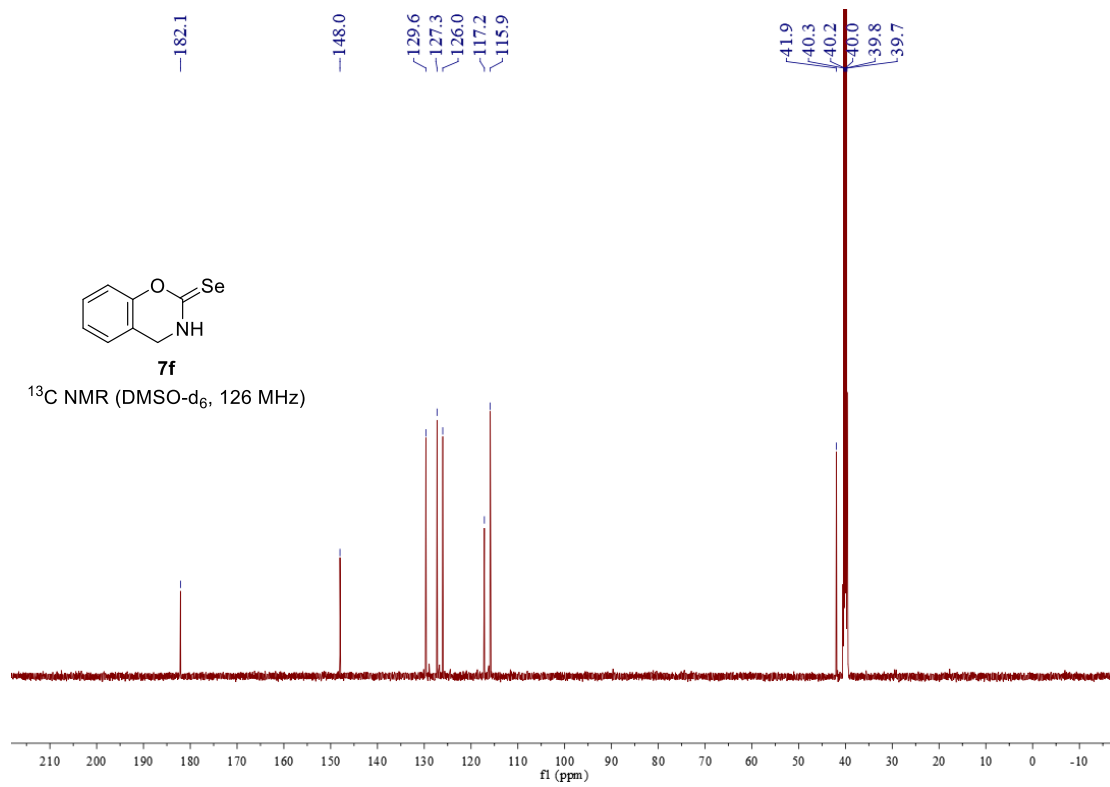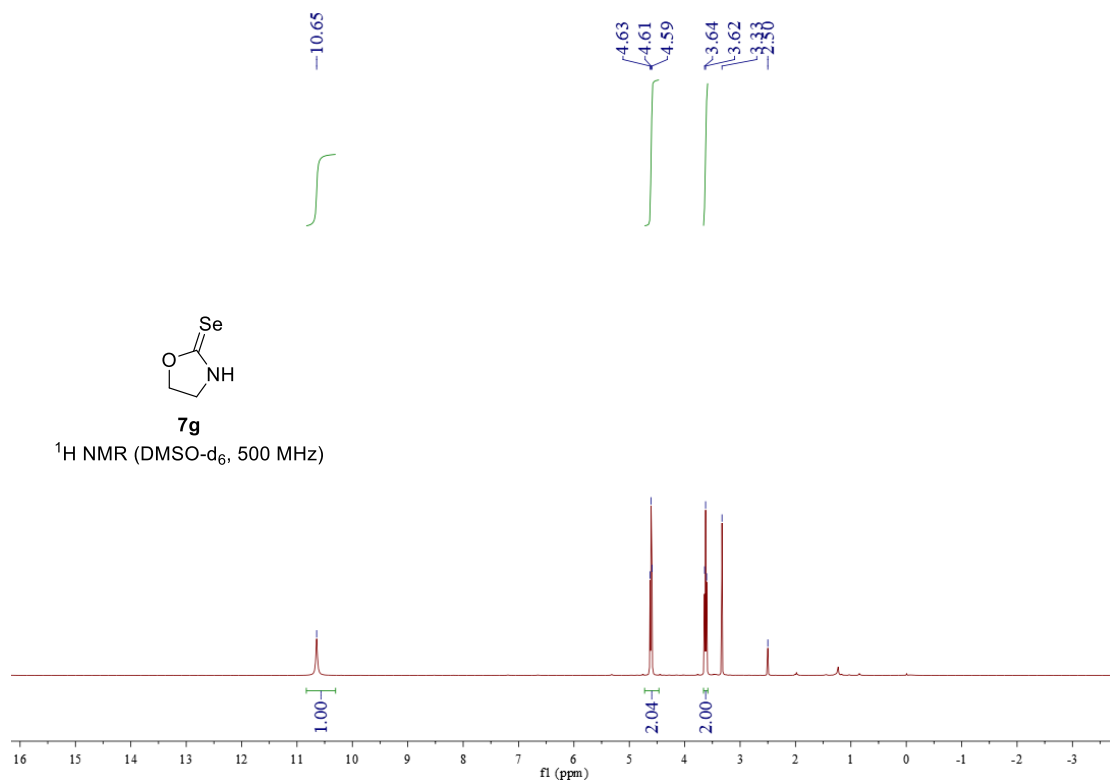

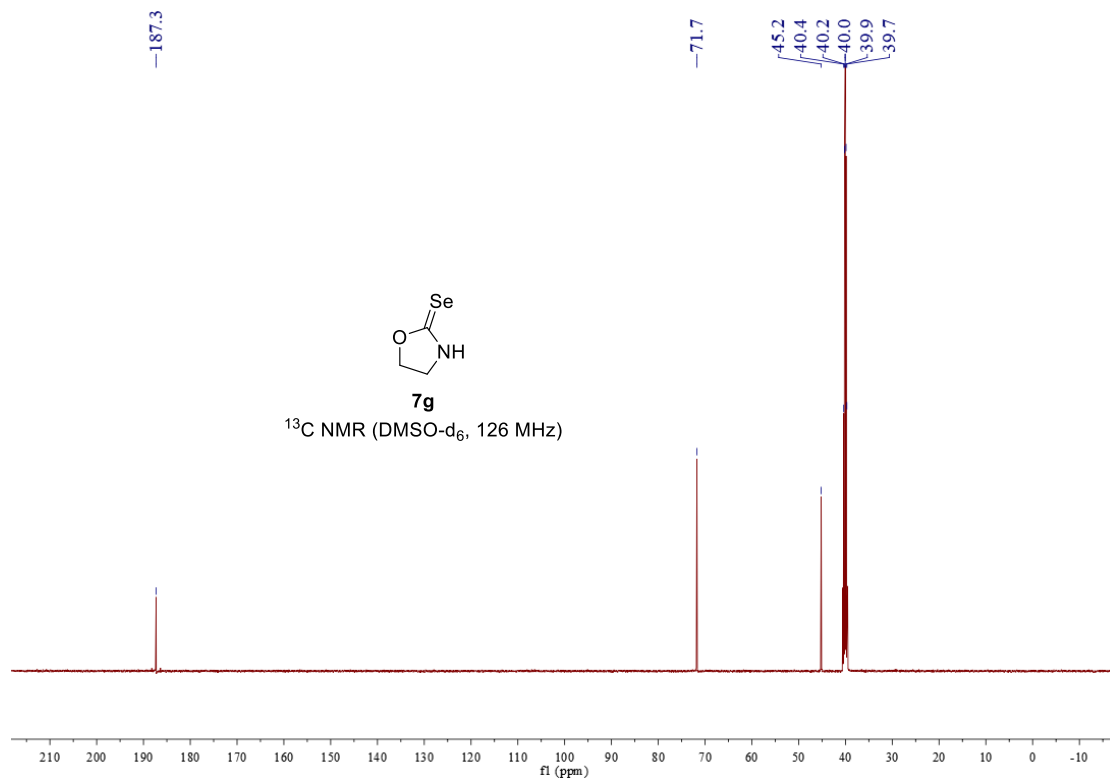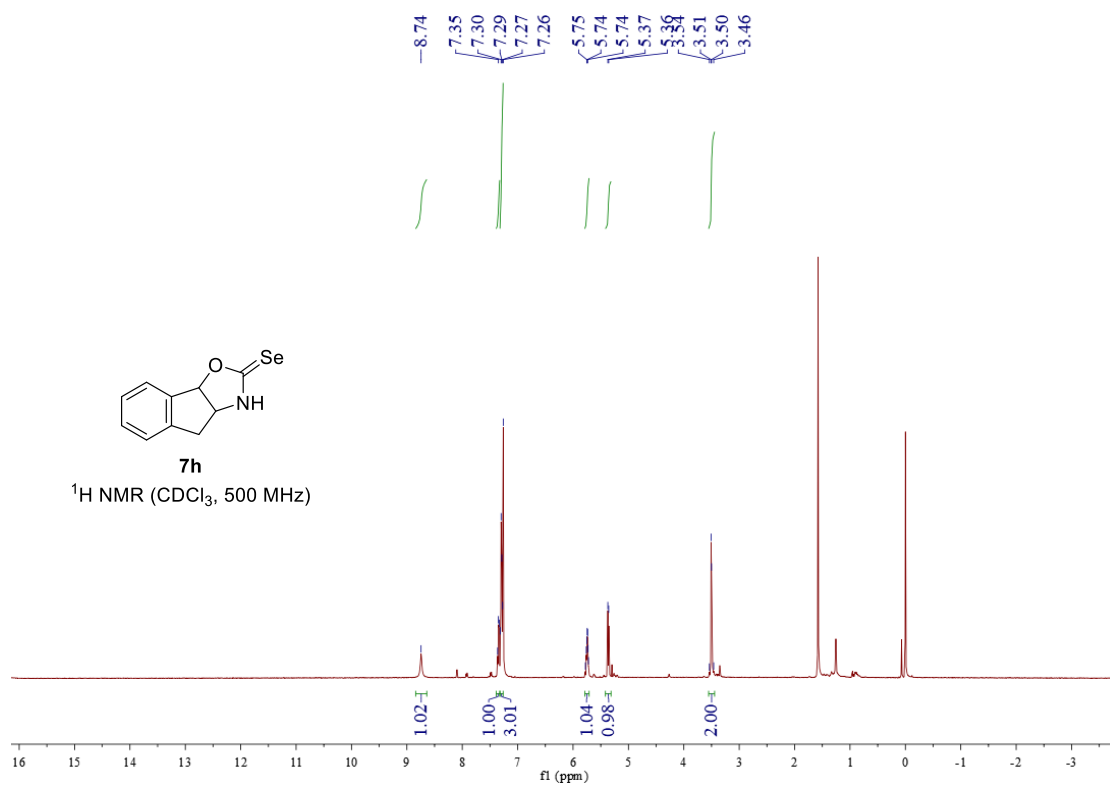

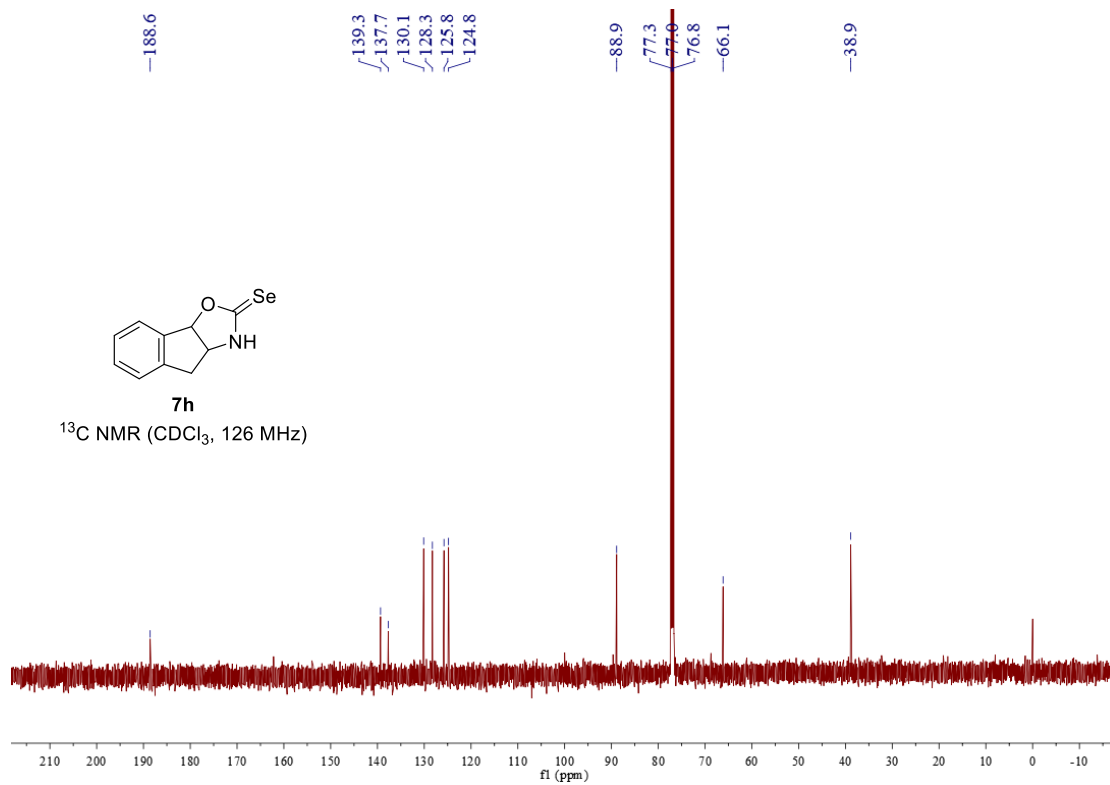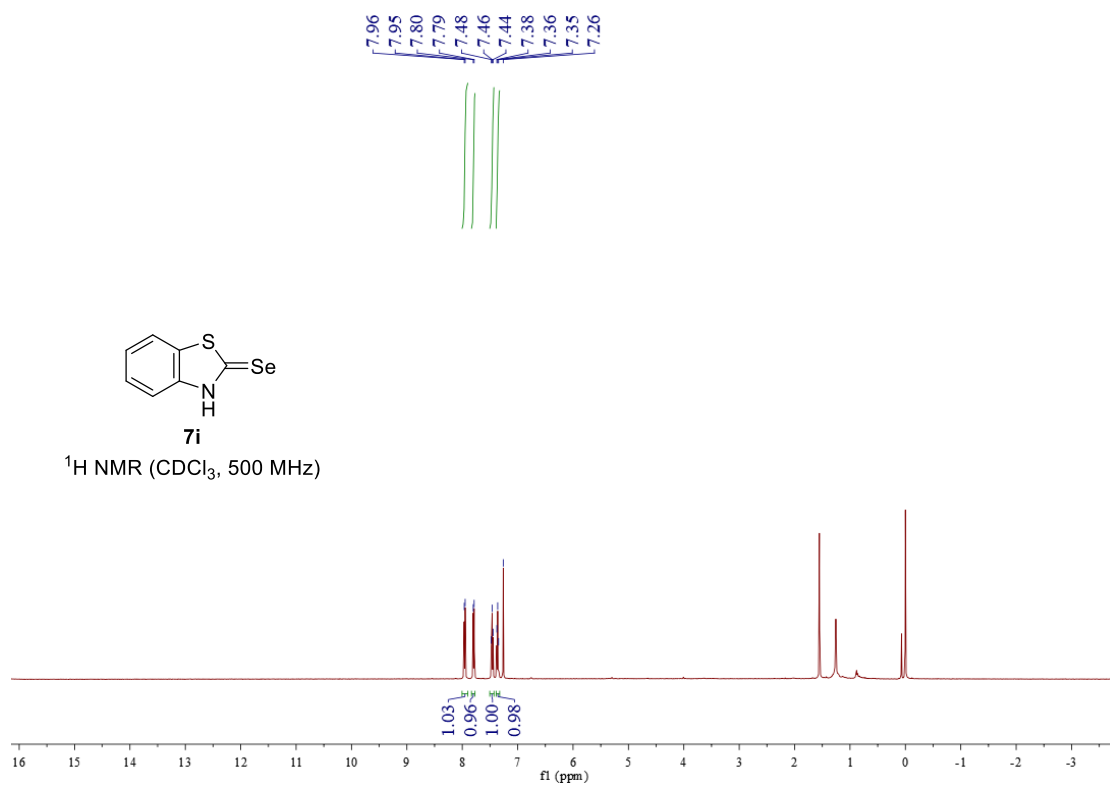

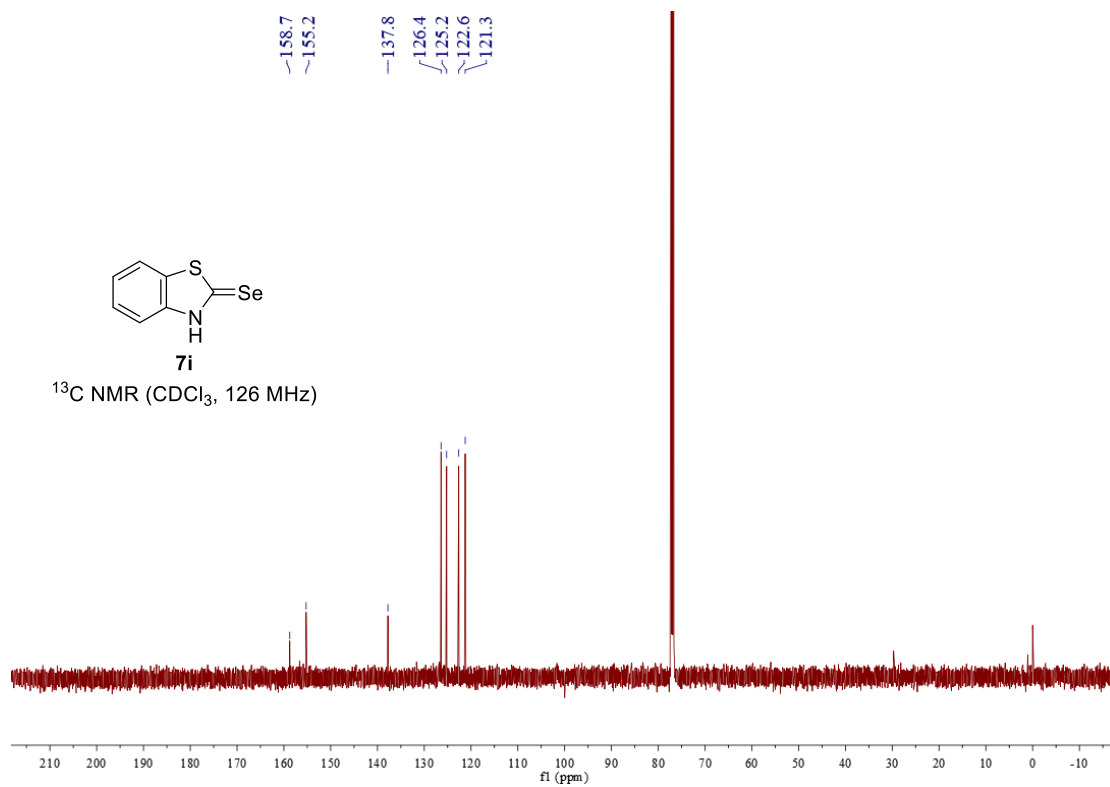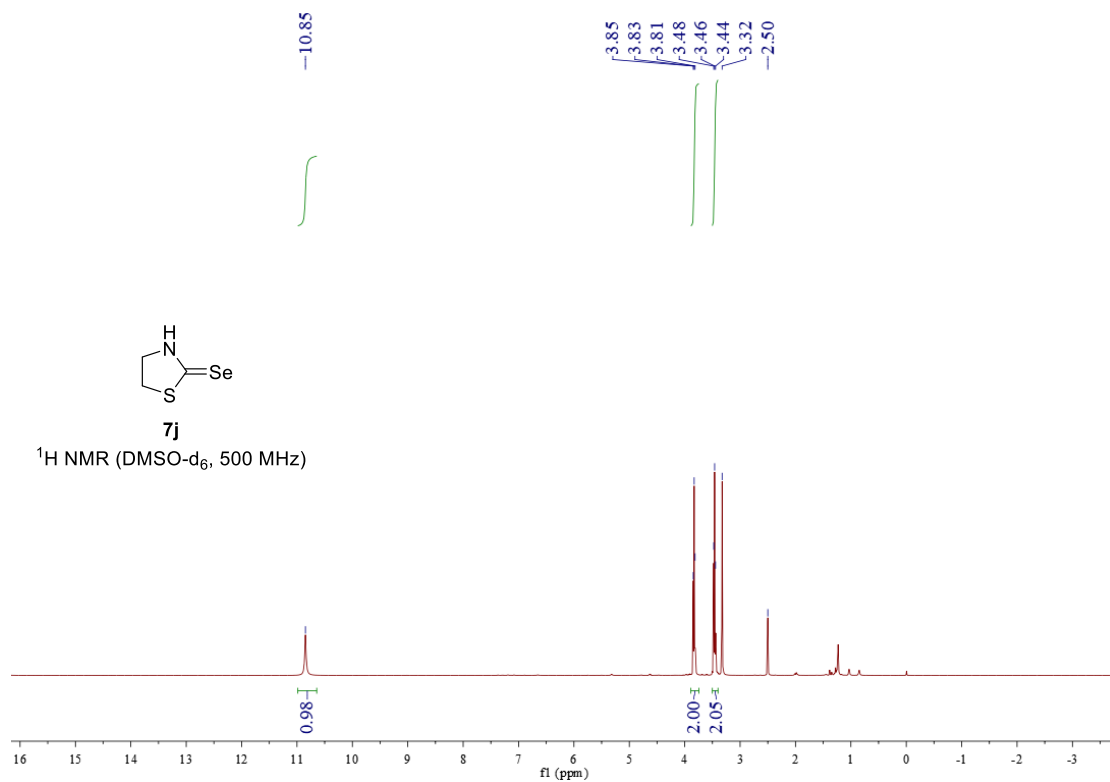

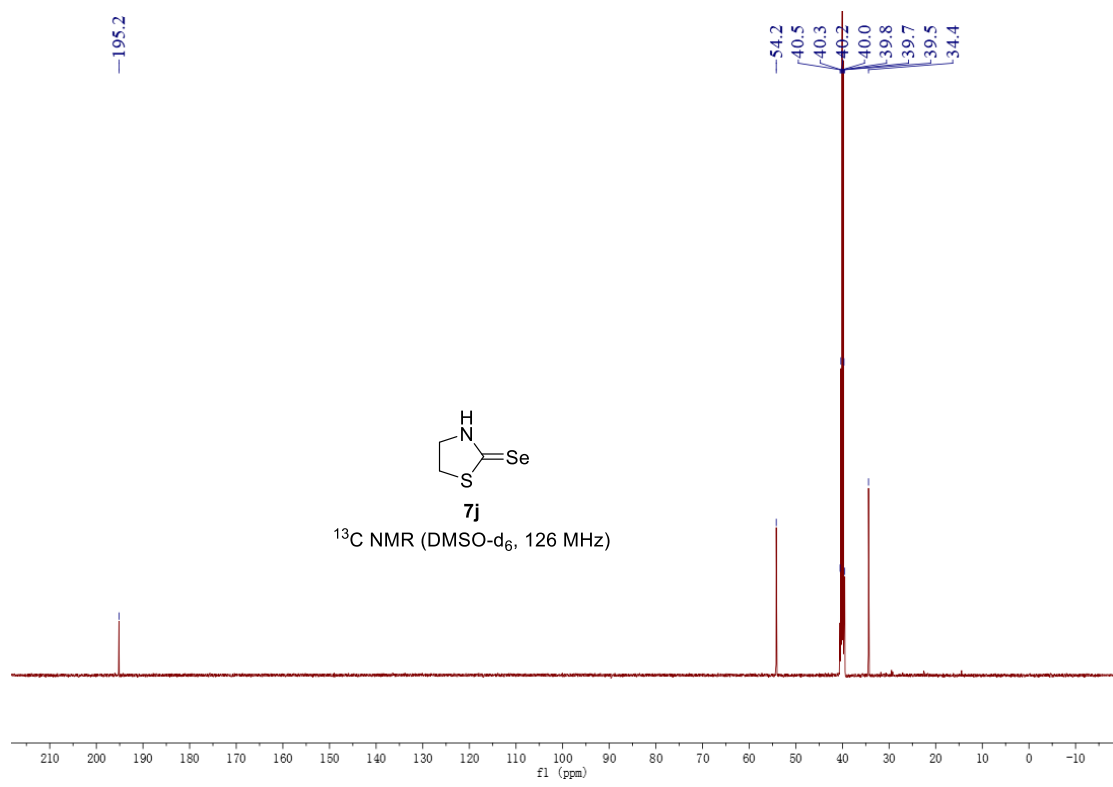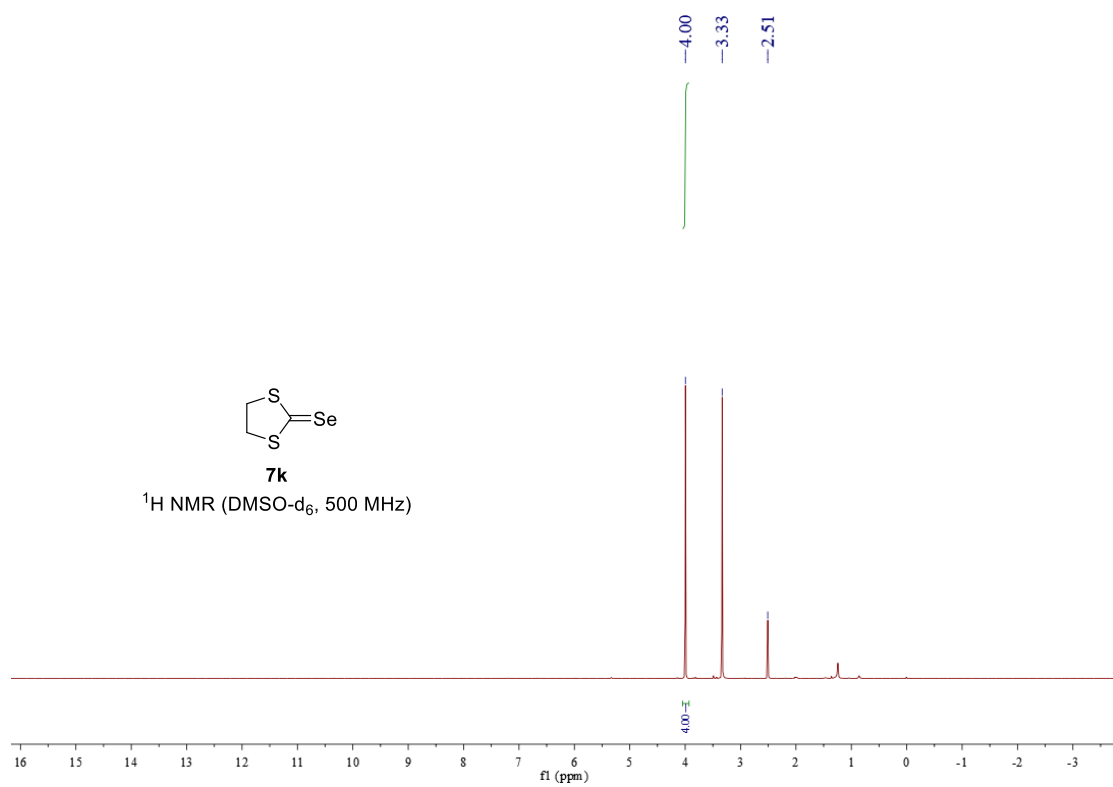

-228.2

47.1  
40.3  
40.2  
40.0  
39.8  
39.7

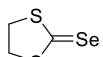

**7k**

$^{13}\text{C}$  NMR (DMSO- $d_6$ , 126 MHz)

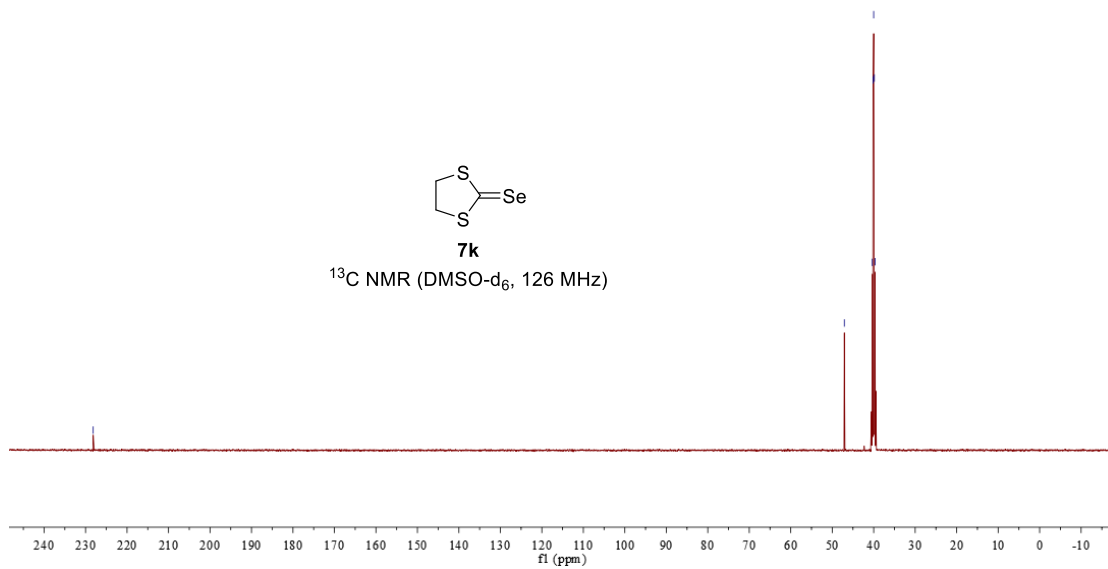

7.44  
7.43  
7.40  
7.38  
7.37  
7.35  
7.34  
7.32  
7.26  
4.66  
4.64  
4.64  
4.63  
4.48  
4.46  
4.44

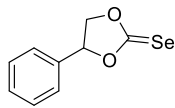

**7l**

$^1\text{H}$  NMR (CDCl $_3$ , 500 MHz)

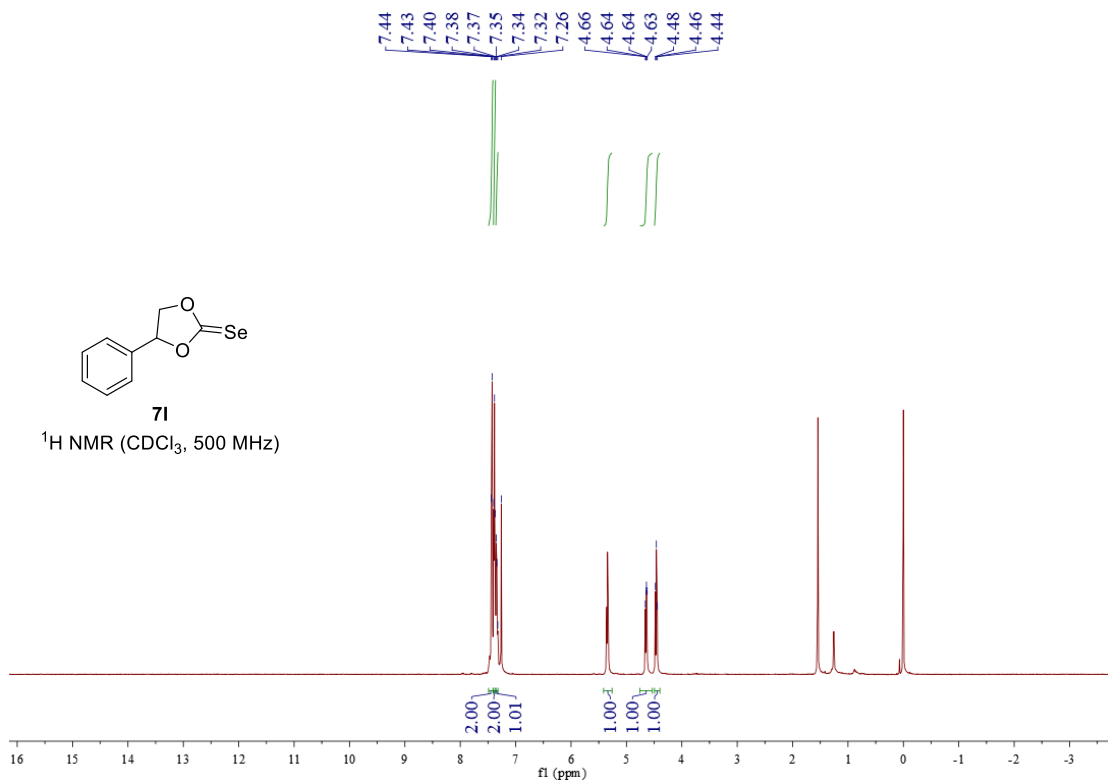



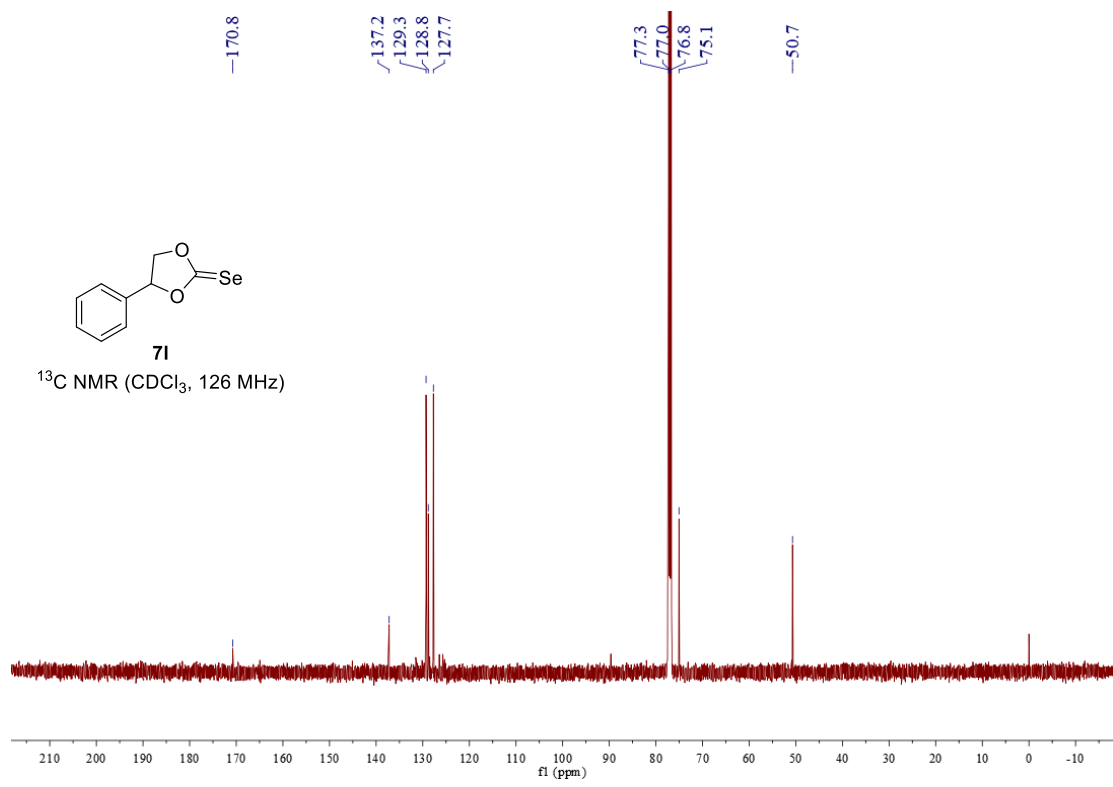

Supplement: d1qo00736j1.pdf [file d1qo00736j1.pdf]
